# Supplementary material for: Virulence and pathogenicity determinants in whole genome sequence of Fusarium udum causing wilt of pigeon pea
Source: Front Microbiol. 2023 Feb 17;14:1066096. doi: 10.3389/fmicb.2023.1066096 (PMC9981795; doi:10.3389/fmicb.2023.1066096)
Supplement: Supplementary file 2 [file Table_1.XLSX]

## Sheet: Sheet1
QueryID	ProteinID (NCBI GI)	Protein_Description	ProteinID	Per_identity	Alignment_length	No.of mismatches	GOP	Query_start	Query_End	Prot_length	Query_coverage	Sub_start	Sub_end	E-value	Bit-score
1	587681187	hypothetical protein FOZG_18494 [Fusarium oxysporum Fo47]	EWZ27792.1	84.25	146	23	0	1	146	147	99.3197	1	146	6e-70	265
2	342871773	hypothetical protein FOXB_15254 [Fusarium oxysporum Fo5176]	EGU74237.1	95.86	266	11	0	1	266	266	100	10	275	1e-149	532
3	751355937	hypothetical protein FAVG1_02219 [Fusarium avenaceum]	KIL93659.1	75.81	277	63	2	1	273	274	99.635	1	277	1e-112	409
4	936410690	hypothetical protein AK830_g7257 [Neonectria ditissima]	KPM39333.1	84.5	387	60	0	1	387	392	98.7245	1	387	0	678
5	590051285	hypothetical protein FOQG_16538 [Fusarium oxysporum f. sp. raphani 54005]	EXK78809.1	83.92	454	37	2	70	487	488	85.6557	10	463	0	731
6	584146339	hypothetical protein FVEG_13575 [Fusarium verticillioides 7600]	EWG55593.1	84.63	410	63	0	39	448	448	91.5179	1	410	0	734
7	358384193	glycoside hydrolase family 67 protein [Trichoderma virens Gv29-8]	EHK21844.1	60.93	837	285	10	1	802	802	100	1	830	0	1025
8	517322736	probable maltose permease (MalP) [Fusarium fujikuroi IMI 58289]	CCT73044.1	98.23	339	6	0	54	392	392	86.4796	199	537	0	684
9	590048735	hypothetical protein FOQG_18992 [Fusarium oxysporum f. sp. raphani 54005]	EXK76259.1	87.89	413	30	1	1	393	408	96.3235	1	413	0	752
11	591458876	hypothetical protein FOIG_16231 [Fusarium oxysporum f. sp. cubense tropical race 4 54006]	EXL90547.1	82.59	586	76	2	1	560	561	99.8217	1	586	0	993
12	584146344	hypothetical protein FVEG_13580 [Fusarium verticillioides 7600]	EWG55598.1	94.29	280	16	0	1	280	281	99.6441	1	280	8e-149	529
13	517322741	uncharacterized protein FFUJ_12949 [Fusarium fujikuroi IMI 58289]	CCT73049.1	80.03	771	108	5	1	726	726	100	1	770	0	1175
14	936410717	hypothetical protein AK830_g7208 [Neonectria ditissima]	KPM39356.1	83.56	219	36	0	1	219	219	100	105	323	4e-107	390
22	587697135	hypothetical protein FOZG_04802 [Fusarium oxysporum Fo47]	EWZ43740.1	99.24	131	1	0	1	131	131	100	89	219	2e-69	263
23	590039232	hypothetical protein FOMG_04627 [Fusarium oxysporum f. sp. melonis 26406]	EXK41090.1	94.51	237	13	0	1	237	237	100	1	237	3e-115	417
24	587675336	arsenical-resistance protein [Fusarium oxysporum FOSC 3-a]	EWY97664.1	98.15	378	7	0	1	378	378	100	6	383	0	743
25	587697140	hypothetical protein FOZG_04805 [Fusarium oxysporum Fo47]	EWZ43745.1	92.4	882	25	1	1	840	840	100	1	882	0	1666
26	517314264	uncharacterized protein FFUJ_03428 [Fusarium fujikuroi IMI 58289]	CCT66402.1	97.74	1152	26	0	1	1152	1152	100	1	1152	0	2279
27	829113153	Uncharacterized protein LW93_1646 [Fusarium fujikuroi]	KLO89587.1	97.56	205	5	0	1	205	205	100	1	205	1e-114	415
28	584135166	hypothetical protein FVEG_05558 [Fusarium verticillioides 7600]	EWG44529.1	95.39	152	7	0	1	152	152	100	1	152	1e-78	294
29	517314261	related to tetracycline resistance protein (probable transport protein) [Fusarium fujikuroi IMI 58289]	CCT66399.1	89.39	528	15	1	1	487	487	100	1	528	0	940
30	584135161	hypothetical protein FVEG_05556 [Fusarium verticillioides 7600]	EWG44524.1	99.52	2284	11	0	1	2284	2284	100	1	2284	0	4715
31	584135160	nuclear distribution protein nudE like 1 [Fusarium verticillioides 7600]	EWG44523.1	89.88	573	7	2	1	522	522	100	1	573	0	961
32	584135159	hypothetical protein FVEG_05554 [Fusarium verticillioides 7600]	EWG44522.1	95.63	1672	67	3	1	1672	1672	100	1	1666	0	3191
33	584135155	hypothetical protein FVEG_05553 [Fusarium verticillioides 7600]	EWG44518.1	94.99	1218	42	1	1	1199	1199	100	1	1218	0	2116
34	517314256	uncharacterized protein FFUJ_03420 [Fusarium fujikuroi IMI 58289]	CCT66394.1	89.16	249	26	1	1	249	251	99.2032	1	248	2e-125	451
35	517314255	sulfur controller-2 protein [Fusarium fujikuroi IMI 58289]	CCT66393.1	98.01	752	14	1	1	751	751	100	1	752	0	1528
36	517314254	uncharacterized protein FFUJ_03418 [Fusarium fujikuroi IMI 58289]	CCT66392.1	98.02	101	2	0	1	101	101	100	1	101	1e-48	194
37	342877067	hypothetical protein FOXB_10899 [Fusarium oxysporum Fo5176]	EGU78579.1	95.26	591	9	2	1	572	585	97.7778	1	591	0	1161
38	342877067	hypothetical protein FOXB_10899 [Fusarium oxysporum Fo5176]	EGU78579.1	83.25	203	2	1	1	171	171	100	645	847	2e-88	327
39	517314251	probable dynactin arp1 p62 subunit RO-2 [Fusarium fujikuroi IMI 58289]	CCT66389.1	99.09	551	5	0	1	551	551	100	1	551	0	1134
40	591425885	hypothetical protein FOCG_00273 [Fusarium oxysporum f. sp. radicis-lycopersici 26381]	EXL61022.1	83.87	124	20	0	1	124	124	100	17	140	7e-55	215
41	587751262	hypothetical protein FOVG_02298 [Fusarium oxysporum f. sp. pisi HDV247]	EXA48978.1	74.61	386	62	2	1	350	351	99.7151	140	525	4e-162	574
42	829142378	Uncharacterized protein LW94_1200 [Fusarium fujikuroi]	KLP14112.1	77.72	588	110	2	1	588	588	100	487	1053	0	911
43	517314300	uncharacterized protein FFUJ_03464 [Fusarium fujikuroi IMI 58289]	CCT66435.1	98.18	165	3	0	1	165	173	95.3757	1	165	1e-87	325
44	829113117	aminopeptidase Y precursor, vacuolar [Fusarium fujikuroi]	KLO89551.1	97.56	491	7	1	1	486	486	100	1	491	0	982
45	302893206	predicted protein [Nectria haematococca mpVI 77-13-4]	XP_003045484.1	85.23	88	0	1	1	75	75	100	1	88	1e-34	148
46	829113116	putative CYS4-cystathionine beta-synthase [Fusarium fujikuroi]	KLO89550.1	99.26	407	3	0	1	407	407	100	111	517	0	829
47	584135218	hypothetical protein FVEG_05603 [Fusarium verticillioides 7600]	EWG44581.1	92.25	284	5	1	1	267	267	100	1	284	2e-140	501
48	584135220	palmitoyltransferase AKR1 [Fusarium verticillioides 7600]	EWG44583.1	99.58	718	3	0	1	718	718	100	1	718	0	1500
49	587675285	hypothetical protein FOYG_02426 [Fusarium oxysporum FOSC 3-a]	EWY97613.1	94.46	415	18	1	1	410	410	100	1	415	0	803
50	591472418	hypothetical protein FOIG_05349 [Fusarium oxysporum f. sp. cubense tropical race 4 54006]	EXM03657.1	99.07	214	2	0	1	214	214	100	1	214	5e-120	433
51	829150486	ACB 4-hydroxyacetophenone monooxygenase [Fusarium fujikuroi]	KLP19056.1	98.25	515	9	0	1	515	515	100	1	515	0	1050
52	587697080	hypothetical protein FOZG_04759 [Fusarium oxysporum Fo47]	EWZ43685.1	98.74	477	6	0	1	477	477	100	1	477	0	956
53	477517636	L-pipecolate oxidase [Fusarium oxysporum f. sp. cubense race 1]	ENH69884.1	92.81	431	7	1	1	407	407	100	1	431	0	818
54	590039174	hypothetical protein FOMG_04582 [Fusarium oxysporum f. sp. melonis 26406]	EXK41032.1	91.81	659	10	3	1	615	615	100	1	659	0	1228
55	587697075	hypothetical protein FOZG_04756 [Fusarium oxysporum Fo47]	EWZ43680.1	98.32	535	9	0	1	535	535	100	1	535	0	1056
56	829113106	uncharacterized protein LW93_1599 [Fusarium fujikuroi]	KLO89540.1	97.1	621	18	0	1	621	621	100	1	621	0	1184
58	584135233	DNA-directed RNA polymerase II subunit RPB9 [Fusarium verticillioides 7600]	EWG44596.1	100	186	0	0	1	186	186	100	1	186	4e-105	383
59	517314315	probable 50S ribosomal protein L14 [Fusarium fujikuroi IMI 58289]	CCT66744.1	100	131	0	0	1	131	131	100	1	131	2e-69	264
60	475666516	Histone-lysine N-methyltransferase SET9 [Fusarium oxysporum f. sp. cubense race 4]	EMT64307.1	98.05	668	13	0	1	668	668	100	1	668	0	1355
61	587675269	oxidoreductase [Fusarium oxysporum FOSC 3-a]	EWY97597.1	98.67	451	6	0	1	451	451	100	1	451	0	928
62	584135239	aminopeptidase Y [Fusarium verticillioides 7600]	EWG44602.1	98.82	508	6	0	1	508	508	100	1	508	0	1035
64	584135245	hypothetical protein FVEG_05621 [Fusarium verticillioides 7600]	EWG44608.1	80.51	313	59	1	1	313	326	96.0123	1	311	3e-146	521
65	517314322	related to anthranilate synthase component [Fusarium fujikuroi IMI 58289]	CCT66454.1	95.49	576	8	1	1	558	558	100	1	576	0	1127
66	517314323	uncharacterized protein FFUJ_03487 [Fusarium fujikuroi IMI 58289]	CCT66455.1	94.82	251	7	1	1	245	251	97.6096	1	251	2e-136	488
67	584135248	hypothetical protein FVEG_05624 [Fusarium verticillioides 7600]	EWG44611.1	74.53	318	35	1	1	272	272	100	1	318	1e-129	465
68	477517621	hypothetical protein FOC1_g10009373 [Fusarium oxysporum f. sp. cubense race 1]	ENH69869.1	87.28	283	36	0	1	283	283	100	1	283	3e-149	530
69	584135250	hypothetical protein FVEG_05626 [Fusarium verticillioides 7600]	EWG44613.1	71.88	288	61	2	1	269	269	100	1	287	9e-115	416
70	584135251	hypothetical protein FVEG_05627 [Fusarium verticillioides 7600]	EWG44614.1	96.75	277	9	0	1	277	277	100	1	277	3e-155	550
71	342881571	hypothetical protein FOXB_07046 [Fusarium oxysporum Fo5176]	EGU82460.1	99.42	171	1	0	1	171	171	100	1	171	1e-97	357
72	517314329	related to thioesterase superfamily member 2 [Fusarium fujikuroi IMI 58289]	CCT66461.1	96.43	168	6	0	1	168	168	100	1	168	8e-90	332
73	584135254	alcohol dehydrogenase [Fusarium verticillioides 7600]	EWG44617.1	99.01	302	3	0	1	302	302	100	55	356	3e-173	610
74	587751222	hypothetical protein FOVG_02265 [Fusarium oxysporum f. sp. pisi HDV247]	EXA48938.1	87.83	682	25	3	31	658	658	95.4407	47	724	0	1213
75	829151957	dihydroxy-acid dehydratase [Fusarium fujikuroi]	KLP19894.1	98.95	572	6	0	1	572	576	99.3056	1	572	0	1150
76	587675250	hypothetical protein FOYG_02398 [Fusarium oxysporum FOSC 3-a]	EWY97578.1	95.86	266	11	0	1	266	266	100	1	266	9e-149	529
77	829117686	uncharacterized protein Y057_6611 [Fusarium fujikuroi]	KLO93953.1	97.5	120	3	0	1	120	120	100	1	120	9e-63	241
79	902726418	hypothetical protein FOXG_02452 [Fusarium oxysporum f. sp. lycopersici 4287]	KNA97986.1	92.75	966	10	4	1	906	906	100	1	966	0	1729
80	587675245	hypothetical protein FOYG_02393 [Fusarium oxysporum FOSC 3-a]	EWY97573.1	99.22	515	4	0	1	515	515	100	1	515	0	1035
81	517314339	uncharacterized protein FFUJ_03503 [Fusarium fujikuroi IMI 58289]	CCT66469.1	74.41	254	47	2	1	236	236	100	1	254	2e-97	358
82	584135266	hypothetical protein FVEG_05641 [Fusarium verticillioides 7600]	EWG44629.1	93.9	328	20	0	1	328	328	100	1	328	0	647
83	475666546	hypothetical protein FOC4_g10010833 [Fusarium oxysporum f. sp. cubense race 4]	EMT64337.1	77.7	426	38	7	1	386	386	100	1	409	2e-159	565
84	517314342	related to alpha-aminoadipate reductase large subunit [Fusarium fujikuroi IMI 58289]	CCT66472.1	97.2	1284	7	2	1	1255	1255	100	1	1284	0	2497
85	829113074	putative lysine permease [Fusarium fujikuroi]	KLO89508.1	87.57	515	6	2	1	457	457	100	1	515	0	883
86	584135271	protein PNS1 [Fusarium verticillioides 7600]	EWG44634.1	80.04	531	43	4	1	470	470	100	1	529	0	828
87	591494892	hypothetical protein FOTG_08440 [Fusarium oxysporum f. sp. vasinfectum 25433]	EXM24433.1	95.54	1391	58	1	1	1391	1391	100	1	1387	0	2762
88	517314346	related to ZFR1 regulator of fumonisin biosynthesis [Fusarium fujikuroi IMI 58289]	CCT66476.1	98.54	751	3	2	1	743	743	100	1	751	0	1509
89	342881588	hypothetical protein FOXB_07063 [Fusarium oxysporum Fo5176]	EGU82477.1	98.53	545	5	3	1	544	544	100	1	543	0	1097
90	517314348	probable aspartic proteinase precursor [Fusarium fujikuroi IMI 58289]	CCT66478.1	90.36	560	13	1	1	519	519	100	1	560	0	1011
91	517314349	related to NmrA-like family protein [Fusarium fujikuroi IMI 58289]	CCT66479.1	97.58	330	8	0	1	330	330	100	1	330	0	663
92	517314350	uncharacterized protein FFUJ_03514 [Fusarium fujikuroi IMI 58289]	CCT66480.1	87.21	344	10	2	1	310	310	100	1	344	3e-172	607
93	829113066	thioredoxin reductase [Fusarium fujikuroi]	KLO89500.1	95.27	317	15	0	1	317	317	100	1	317	6e-174	613
94	829113065	uncharacterized protein LW93_1558 [Fusarium fujikuroi]	KLO89499.1	97.33	375	10	0	1	375	375	100	1	375	0	753
95	590039120	xaa-Pro dipeptidase [Fusarium oxysporum f. sp. melonis 26406]	EXK40978.1	99.14	463	4	0	1	463	463	100	70	532	0	956
96	591472359	hypothetical protein FOIG_05301 [Fusarium oxysporum f. sp. cubense tropical race 4 54006]	EXM03598.1	96.15	623	18	1	1	617	617	100	1	623	0	1188
97	829132778	uncharacterized protein Y057_11250 [Fusarium fujikuroi]	KLP06806.1	94.72	644	23	2	1	644	644	100	1	633	0	1115
98	517314356	related to serine-type carboxypeptidase Z precursor [Fusarium fujikuroi IMI 58289]	CCT66485.1	96.73	612	20	0	1	612	612	100	1	612	0	1239
99	342881597	hypothetical protein FOXB_07072 [Fusarium oxysporum Fo5176]	EGU82486.1	87.3	795	16	4	1	710	710	100	1	795	0	1298
101	517314359	related to GABA permease [Fusarium fujikuroi IMI 58289]	CCT66488.1	99.43	525	3	0	1	525	525	100	1	525	0	1056
102	584135291	hypothetical protein FVEG_05662 [Fusarium verticillioides 7600]	EWG44654.1	100	146	0	0	1	146	146	100	1	146	7e-78	291
104	902726453	hypothetical protein FOXG_02476 [Fusarium oxysporum f. sp. lycopersici 4287]	KNA98021.1	88.91	523	14	2	1	479	479	100	1	523	0	914
106	591494865	hypothetical protein FOTG_08421 [Fusarium oxysporum f. sp. vasinfectum 25433]	EXM24406.1	87.48	599	57	3	1	596	730	81.6438	58	641	0	971
107	584135296	hypothetical protein FVEG_05665 [Fusarium verticillioides 7600]	EWG44659.1	96.17	183	5	1	1	181	181	100	68	250	5e-75	283
108	591494863	hypothetical protein FOTG_08419 [Fusarium oxysporum f. sp. vasinfectum 25433]	EXM24404.1	88.5	661	58	3	1	643	644	99.8447	1	661	0	1154
109	584135298	UDP-glucose 4-epimerase [Fusarium verticillioides 7600]	EWG44661.1	95.76	425	18	0	1	425	425	100	1	425	0	845
110	584135299	adenosine deaminase [Fusarium verticillioides 7600]	EWG44662.1	91.58	368	31	0	1	368	370	99.4595	1	368	0	720
111	477517579	hypothetical protein FOC1_g10009330 [Fusarium oxysporum f. sp. cubense race 1]	ENH69827.1	96.07	407	16	0	1	407	407	100	1	407	0	820
112	584135301	hypothetical protein FVEG_05669 [Fusarium verticillioides 7600]	EWG44664.1	91.31	495	18	1	1	470	470	100	1	495	0	907
113	829132763	uncharacterized protein Y057_11235 [Fusarium fujikuroi]	KLP06791.1	81.17	478	67	1	5	459	460	98.913	2	479	0	811
114	517314455	related to hexose transporter protein [Fusarium fujikuroi IMI 58289]	CCT66580.1	92.35	353	27	0	1	353	409	86.3081	1	353	0	657
115	587709659	hypothetical protein FOWG_14998 [Fusarium oxysporum f. sp. lycopersici MN25]	EWZ80996.1	85.58	846	111	1	1	835	835	100	1	846	0	1508
116	517314453	uncharacterized protein FFUJ_03617 [Fusarium fujikuroi IMI 58289]	CCT66578.1	74.24	264	21	1	1	217	217	100	1	264	3e-109	397
117	517314452	related to bifunctional 4-hydroxyphenylacetate degradation enzyme [Fusarium fujikuroi IMI 58289]	CCT66577.1	80.71	280	17	1	1	243	243	100	1	280	3e-125	451
119	829112971	gamma hydroxybutyrate dehydrogenase [Fusarium fujikuroi]	KLO89405.1	91.76	267	22	0	1	267	267	100	1	267	2e-143	511
120	584135369	hypothetical protein FVEG_05730 [Fusarium verticillioides 7600]	EWG44732.1	92.73	399	29	0	1	399	400	99.75	1	399	0	725
122	475675249	hypothetical protein FOC4_g10001774 [Fusarium oxysporum f. sp. cubense race 4]	EMT72324.1	84.49	922	115	6	1	901	1085	83.0415	1	915	0	1588
123	591459683	hypothetical protein FOIG_15583 [Fusarium oxysporum f. sp. cubense tropical race 4 54006]	EXL91309.1	77.67	421	60	1	1	387	387	100	1	421	0	639
124	587675059	hypothetical protein FOYG_02235 [Fusarium oxysporum FOSC 3-a]	EWY97387.1	90.28	360	35	0	1	360	360	100	1	360	0	688
125	591459686	hypothetical protein FOIG_15586 [Fusarium oxysporum f. sp. cubense tropical race 4 54006]	EXL91312.1	83.88	583	94	0	1	583	583	100	1	583	0	1033
126	517314442	related to YPC1-alkaline ceramidase [Fusarium fujikuroi IMI 58289]	CCT66567.1	86	50	7	0	1	50	50	100	218	267	6e-20	99.4
128	587751121	hypothetical protein FOVG_02179 [Fusarium oxysporum f. sp. pisi HDV247]	EXA48837.1	91.78	596	37	2	2	585	585	99.8291	40	635	0	1124
129	829112998	uncharacterized protein LW93_1491 [Fusarium fujikuroi]	KLO89432.1	71.1	353	96	2	2	348	348	99.7126	38	390	7e-141	503
130	587735580	hypothetical protein FOVG_15376 [Fusarium oxysporum f. sp. pisi HDV247]	EXA33296.1	93.46	428	11	1	1	411	421	97.6247	1	428	0	812
131	590025408	hypothetical protein FOMG_16088 [Fusarium oxysporum f. sp. melonis 26406]	EXK27266.1	88.17	634	75	0	13	646	647	97.9907	74	707	0	1169
132	587709616	D-lactate dehydrogenase (cytochrome) [Fusarium oxysporum f. sp. lycopersici MN25]	EWZ80953.1	89.86	503	26	1	1	478	478	100	66	568	0	938
133	591438086	hypothetical protein FOPG_13394 [Fusarium oxysporum f. sp. conglutinans race 2 54008]	EXL70845.1	87.68	276	34	0	1	276	276	100	1	276	4e-137	490
134	902726527	hypothetical protein FOXG_02528 [Fusarium oxysporum f. sp. lycopersici 4287]	KNA98095.1	91.41	256	21	1	1	255	255	100	286	541	3e-134	481
135	477520108	hypothetical protein FOC1_g10004481 [Fusarium oxysporum f. sp. cubense race 1]	ENH72244.1	94.76	267	14	0	1	267	267	100	1	267	5e-149	530
136	477520109	Aspartate aminotransferase, mitochondrial [Fusarium oxysporum f. sp. cubense race 1]	ENH72245.1	75.97	412	54	3	1	386	386	100	1	393	0	643
137	517311907	TY3B-TY3B protein [Fusarium fujikuroi IMI 58289]	CCT63216.1	74.76	103	26	0	1	103	103	100	820	922	1e-41	171
138	590025418	2,4-dihydroxyhept-2-ene-1,7-dioic acid aldolase [Fusarium oxysporum f. sp. melonis 26406]	EXK27276.1	96.63	178	6	0	1	178	179	99.4413	1	178	5e-92	339
139	584135354	hypothetical protein FVEG_05715 [Fusarium verticillioides 7600]	EWG44717.1	91.25	80	7	0	1	80	87	91.954	1	80	2e-35	150
140	517314430	uncharacterized protein FFUJ_03594 [Fusarium fujikuroi IMI 58289]	CCT66557.1	81.13	657	54	3	6	592	592	99.1554	4	660	0	1080
143	584135357	hypothetical protein FVEG_05718 [Fusarium verticillioides 7600]	EWG44720.1	98.54	481	7	0	1	481	481	100	1	481	0	975
144	584135358	hypothetical protein FVEG_05719 [Fusarium verticillioides 7600]	EWG44721.1	95.22	439	10	1	1	428	429	99.7669	1	439	0	866
145	584135359	hypothetical protein FVEG_15710 [Fusarium verticillioides 7600]	EWG44722.1	93.77	706	38	3	1	701	701	100	1	705	0	1362
146	829130311	uncharacterized protein Y057_6553 [Fusarium fujikuroi]	KLP04800.1	60	355	125	1	22	376	376	94.4149	1	338	1e-115	420
147	342884494	hypothetical protein FOXB_04776 [Fusarium oxysporum Fo5176]	EGU84706.1	83.15	2018	169	8	47	1899	1901	97.475	73	2084	0	3382
150	829113001	uncharacterized protein LW93_1494 [Fusarium fujikuroi]	KLO89435.1	79.39	757	103	6	1	708	708	100	1	753	0	1211
151	902726506	hypothetical protein FOXG_02515 [Fusarium oxysporum f. sp. lycopersici 4287]	KNA98074.1	67.85	311	100	0	1	311	312	99.6795	1	311	2e-118	429
152	475675288	Aminopeptidase 2 [Fusarium oxysporum f. sp. cubense race 4]	EMT72363.1	75.66	871	159	4	1	818	818	100	1	871	0	1329
153	475675289	Disease resistance protein RFL1 [Fusarium oxysporum f. sp. cubense race 4]	EMT72364.1	80.35	789	95	6	1	764	764	100	223	976	0	1267
154	591425755	hypothetical protein FOCG_00163 [Fusarium oxysporum f. sp. radicis-lycopersici 26381]	EXL60892.1	78.22	574	95	4	1	544	545	99.8165	1	574	0	922
157	584135342	hypothetical protein FVEG_05701 [Fusarium verticillioides 7600]	EWG44705.1	90.04	261	26	0	1	261	261	100	1	261	1e-135	485
158	475666610	Putative pectin lyase C [Fusarium oxysporum f. sp. cubense race 4]	EMT64401.1	93.03	373	5	1	1	352	352	100	1	373	0	708
159	591425760	hypothetical protein FOCG_00168 [Fusarium oxysporum f. sp. radicis-lycopersici 26381]	EXL60897.1	84.16	486	77	0	1	486	486	100	1	486	0	841
160	477517552	Putative amidohydrolase ytcJ [Fusarium oxysporum f. sp. cubense race 1]	ENH69800.1	94.7	661	35	0	1	661	661	100	1	661	0	1295
161	829113018	Uncharacterized protein LW93_1511 [Fusarium fujikuroi]	KLO89452.1	94.82	502	12	1	1	488	488	100	1	502	0	940
162	587696970	murein transglycosylase [Fusarium oxysporum Fo47]	EWZ43575.1	90.11	435	13	1	1	405	421	96.1995	1	435	0	762
163	587751140	hypothetical protein FOVG_02195 [Fusarium oxysporum f. sp. pisi HDV247]	EXA48856.1	94.29	490	28	0	1	490	490	100	1	490	0	967
164	829113021	nicotinamide mononucleotide permease [Fusarium fujikuroi]	KLO89455.1	97.7	565	13	0	1	565	565	100	1	565	0	1145
165	829113022	uncharacterized protein LW93_1515 [Fusarium fujikuroi]	KLO89456.1	94.65	486	5	1	1	465	465	100	1	486	0	909
166	517314394	related to dis1-suppressing protein kinase dsk1 [Fusarium fujikuroi IMI 58289]	CCT66522.1	72.54	448	97	5	4	450	450	99.3333	3	425	0	648
168	475666600	hypothetical protein FOC4_g10010890 [Fusarium oxysporum f. sp. cubense race 4]	EMT64391.1	97.92	240	5	0	1	240	240	100	1	240	1e-137	492
169	342877330	hypothetical protein FOXB_10667 [Fusarium oxysporum Fo5176]	EGU78799.1	98.55	346	5	0	1	346	346	100	1	346	0	701
170	477517562	Esterase [Fusarium oxysporum f. sp. cubense race 1]	ENH69810.1	89.37	301	17	1	1	286	288	99.3056	1	301	1e-154	548
171	829113027	sugar transporter [Fusarium fujikuroi]	KLO89461.1	94.97	517	3	1	1	494	494	100	1	517	0	986
172	517314389	related to alpha-L-arabinofuranosidase A precursor [Fusarium fujikuroi IMI 58289]	CCT66517.1	88.64	660	14	2	1	599	599	100	1	660	0	1175
175	584135324	hypothetical protein FVEG_15703 [Fusarium verticillioides 7600]	EWG44687.1	95.65	69	3	0	1	69	70	98.5714	1	69	3e-19	97.1
176	902726483	hypothetical protein FOXG_02498 [Fusarium oxysporum f. sp. lycopersici 4287]	KNA98051.1	80.89	518	40	2	1	459	459	100	57	574	0	842
177	584135321	hypothetical protein FVEG_05686 [Fusarium verticillioides 7600]	EWG44684.1	95.3	404	19	0	1	404	404	100	1	404	0	712
178	342877337	hypothetical protein FOXB_10674 [Fusarium oxysporum Fo5176]	EGU78806.1	81.95	781	122	5	1	763	763	100	1	780	0	1222
179	751346029	hypothetical protein FAVG1_13027 [Fusarium avenaceum]	KIL83751.1	64.19	310	86	7	1	290	290	100	1	305	1e-100	369
180	584135318	alcohol dehydrogenase [Fusarium verticillioides 7600]	EWG44681.1	92.16	306	24	0	1	306	308	99.3506	1	306	1e-163	578
181	591404721	hypothetical protein FOCG_17525 [Fusarium oxysporum f. sp. radicis-lycopersici 26381]	EXL39858.1	98.94	472	5	0	1	472	472	100	1	472	0	954
182	342886648	hypothetical protein FOXB_03073 [Fusarium oxysporum Fo5176]	EGU86411.1	77.4	146	30	1	1	143	144	99.3056	207	352	3e-62	239
183	591431409	hypothetical protein FOPG_18498 [Fusarium oxysporum f. sp. conglutinans race 2 54008]	EXL65266.1	91.25	160	14	0	1	160	160	100	1	160	3e-83	309
189	591404729	hypothetical protein FOCG_17533 [Fusarium oxysporum f. sp. radicis-lycopersici 26381]	EXL39866.1	98.49	397	6	0	1	397	397	100	1	397	0	810
190	591404730	hypothetical protein FOCG_17534 [Fusarium oxysporum f. sp. radicis-lycopersici 26381]	EXL39867.1	98.63	291	4	0	1	291	291	100	1	291	1e-169	598
192	591404732	hypothetical protein FOCG_17536 [Fusarium oxysporum f. sp. radicis-lycopersici 26381]	EXL39869.1	98.81	84	1	0	1	84	97	86.5979	1	84	3e-40	166
193	591404733	hypothetical protein FOCG_17537 [Fusarium oxysporum f. sp. radicis-lycopersici 26381]	EXL39870.1	100	96	0	0	1	96	96	100	1	96	2e-48	194
194	591404734	hypothetical protein FOCG_17538 [Fusarium oxysporum f. sp. radicis-lycopersici 26381]	EXL39871.1	94.16	257	12	1	1	254	255	99.6078	1	257	3e-135	484
195	591404735	hypothetical protein FOCG_17539 [Fusarium oxysporum f. sp. radicis-lycopersici 26381]	EXL39872.1	97.95	195	4	0	1	195	195	100	1	195	5e-110	399
198	591404738	hypothetical protein FOCG_17542 [Fusarium oxysporum f. sp. radicis-lycopersici 26381]	EXL39875.1	91.95	87	6	1	1	86	86	100	482	568	2e-40	167
199	591404738	hypothetical protein FOCG_17542 [Fusarium oxysporum f. sp. radicis-lycopersici 26381]	EXL39875.1	83.17	398	20	1	1	351	351	100	1	398	2e-179	632
200	591404739	hypothetical protein FOCG_17543 [Fusarium oxysporum f. sp. radicis-lycopersici 26381]	EXL39876.1	98.42	190	3	0	1	190	190	100	1	190	3e-101	370
201	591404740	hypothetical protein FOCG_17544 [Fusarium oxysporum f. sp. radicis-lycopersici 26381]	EXL39877.1	89.84	433	24	3	1	413	413	100	1	433	0	750
205	591404744	hypothetical protein FOCG_17548 [Fusarium oxysporum f. sp. radicis-lycopersici 26381]	EXL39881.1	97.77	179	4	0	1	179	179	100	1	179	1e-97	358
206	591404745	hypothetical protein FOCG_17549 [Fusarium oxysporum f. sp. radicis-lycopersici 26381]	EXL39882.1	88.91	568	56	3	23	590	605	93.8843	1	561	0	1028
207	591435335	hypothetical protein FOPG_15651 [Fusarium oxysporum f. sp. conglutinans race 2 54008]	EXL68292.1	78.35	194	30	1	1	182	182	100	1	194	1e-83	311
212	591461966	hypothetical protein FOIG_13642 [Fusarium oxysporum f. sp. cubense tropical race 4 54006]	EXL93509.1	85.38	301	44	0	1	301	331	90.9366	1	301	4e-150	534
213	591403895	hypothetical protein FOCG_18347 [Fusarium oxysporum f. sp. radicis-lycopersici 26381]	EXL39032.1	83.81	488	79	0	1	488	488	100	1	488	0	868
215	927749475	het-protein, partial [Fusarium langsethiae]	KPA35268.1	81.03	564	107	0	1	564	582	96.9072	1	564	0	922
216	591404605	hypothetical protein FOCG_17653 [Fusarium oxysporum f. sp. radicis-lycopersici 26381]	EXL39742.1	92.12	622	24	1	22	618	619	96.4459	1	622	0	1107
217	477520160	hypothetical protein FOC1_g10004535 [Fusarium oxysporum f. sp. cubense race 1]	ENH72296.1	98.33	359	6	0	1	359	359	100	1	359	0	727
218	517314482	uncharacterized protein FFUJ_03647 [Fusarium fujikuroi IMI 58289]	CCT66605.1	99.27	274	2	0	1	274	274	100	1	274	3e-157	557
219	829112947	tetracycline resistance protein [Fusarium fujikuroi]	KLO89381.1	92.68	164	12	0	1	164	176	93.1818	1	164	8e-85	315
220	591488206	hypothetical protein FOTG_13920 [Fusarium oxysporum f. sp. vasinfectum 25433]	EXM17950.1	89.81	206	18	1	1	203	203	100	215	420	2e-104	381
221	342873185	hypothetical protein FOXB_14079 [Fusarium oxysporum Fo5176]	EGU75404.1	86.92	390	2	2	1	341	341	100	1	390	0	637
222	590025479	hypothetical protein FOMG_16152 [Fusarium oxysporum f. sp. melonis 26406]	EXK27337.1	85.52	449	62	1	1	446	448	99.5536	1	449	0	788
223	829112934	beta-mannosidase [Fusarium fujikuroi]	KLO89368.1	91.9	864	70	0	1	864	864	100	1	864	0	1680
224	584135402	hypothetical protein FVEG_05756 [Fusarium verticillioides 7600]	EWG44765.1	93.75	496	16	1	1	481	481	100	1	496	0	935
225	584135403	hypothetical protein FVEG_15720 [Fusarium verticillioides 7600]	EWG44766.1	88.21	619	40	1	3	588	588	99.6599	16	634	0	1093
226	584135404	hypothetical protein FVEG_05759 [Fusarium verticillioides 7600]	EWG44767.1	98.32	358	6	0	1	358	361	99.169	1	358	0	739
227	584135405	hypothetical protein FVEG_05760 [Fusarium verticillioides 7600]	EWG44768.1	87.29	118	15	0	2	119	121	97.5207	53	170	8e-57	221
228	591459625	hypothetical protein FOIG_15538 [Fusarium oxysporum f. sp. cubense tropical race 4 54006]	EXL91251.1	72.84	475	102	3	1	475	475	100	1	448	0	689
229	584135409	hypothetical protein FVEG_05763 [Fusarium verticillioides 7600]	EWG44772.1	83.5	394	28	2	6	364	366	98.0874	20	411	0	648
230	829112941	amidase family protein [Fusarium fujikuroi]	KLO89375.1	88.01	634	43	1	1	601	603	99.6683	1	634	0	1094
231	371942485	tryptophan-2-monooxygenase [Fusarium proliferatum]	AEX60886.1	96.09	588	23	0	6	593	593	99.1568	36	623	0	1162
232	584135412	hypothetical protein FVEG_05766 [Fusarium verticillioides 7600]	EWG44775.1	90.81	272	6	1	1	253	253	100	100	371	7e-140	499
233	517314486	uncharacterized protein FFUJ_03651 [Fusarium fujikuroi IMI 58289]	CCT66609.1	92.19	589	45	1	1	588	588	100	1	589	0	1107
234	517314499	uncharacterized protein FFUJ_03663 [Fusarium fujikuroi IMI 58289]	CCT66621.1	76.77	254	59	0	37	290	290	87.5862	162	415	6e-109	397
235	475675195	Hyaluronan synthase [Fusarium oxysporum f. sp. cubense race 4]	EMT72270.1	92.89	492	35	0	1	492	492	100	1	492	0	949
236	829112931	hard surface induced protein 3 [Fusarium fujikuroi]	KLO89365.1	92.07	429	34	0	1	429	429	100	1	429	0	809
237	584135418	hypothetical protein FVEG_05771 [Fusarium verticillioides 7600]	EWG44781.1	76.77	254	27	1	1	222	222	100	1	254	3e-110	400
238	584135419	hypothetical protein FVEG_05772 [Fusarium verticillioides 7600]	EWG44782.1	98.04	255	5	0	1	255	255	100	1	255	5e-145	516
239	587735687	hypothetical protein FOVG_15470 [Fusarium oxysporum f. sp. pisi HDV247]	EXA33403.1	95.2	479	22	1	1	478	478	100	26	504	0	947
240	584135421	hypothetical protein FVEG_05774 [Fusarium verticillioides 7600]	EWG44784.1	94.17	223	13	0	1	223	223	100	1	223	6e-121	436
241	584135422	hypothetical protein FVEG_05775 [Fusarium verticillioides 7600]	EWG44785.1	89.62	530	55	0	1	530	532	99.6241	1	530	0	951
242	587674988	hypothetical protein FOYG_02176 [Fusarium oxysporum FOSC 3-a]	EWY97316.1	98.92	556	6	0	1	556	556	100	1	556	0	1134
243	477520188	Glucosamine-6-phosphate deaminase [Fusarium oxysporum f. sp. cubense race 1]	ENH72324.1	97.75	311	7	0	1	311	311	100	1	311	2e-179	631
244	584135426	hypothetical protein FVEG_05778 [Fusarium verticillioides 7600]	EWG44789.1	92.24	554	18	1	1	529	529	100	1	554	0	1031
245	477520190	Lactose permease [Fusarium oxysporum f. sp. cubense race 1]	ENH72326.1	98.28	523	9	0	1	523	523	100	1	523	0	1043
246	584135429	beta-galactosidase [Fusarium verticillioides 7600]	EWG44792.1	90.43	1024	65	2	1	993	993	100	5	1026	0	1910
247	587709730	hypothetical protein FOWG_15055 [Fusarium oxysporum f. sp. lycopersici MN25]	EWZ81067.1	89.51	324	31	1	1	321	321	100	1	324	2e-171	605
248	591425627	hypothetical protein FOCG_00055 [Fusarium oxysporum f. sp. radicis-lycopersici 26381]	EXL60764.1	90.72	97	9	0	2	98	98	98.9796	47	143	3e-44	180
249	475675178	Endoglucanase [Fusarium oxysporum f. sp. cubense race 4]	EMT72253.1	93.57	140	9	0	34	173	173	80.9249	285	424	7e-74	279
250	587674981	2,3-bisphosphoglycerate-dependent phosphoglycerate mutase [Fusarium oxysporum FOSC 3-a]	EWY97309.1	91.74	218	18	0	1	218	220	99.0909	1	218	2e-115	418
251	587709733	hypothetical protein FOWG_15058 [Fusarium oxysporum f. sp. lycopersici MN25]	EWZ81070.1	88.75	311	35	0	1	311	311	100	1	311	7e-167	589
253	587735704	hypothetical protein FOVG_15484 [Fusarium oxysporum f. sp. pisi HDV247]	EXA33420.1	93.75	224	10	1	1	220	220	100	1	224	9e-118	426
255	587735707	hypothetical protein FOVG_15487 [Fusarium oxysporum f. sp. pisi HDV247]	EXA33423.1	89.17	674	73	0	1	674	674	100	1	674	0	1244
256	591425618	hypothetical protein FOCG_00047 [Fusarium oxysporum f. sp. radicis-lycopersici 26381]	EXL60755.1	88.37	473	55	0	1	473	473	100	1	473	0	869
257	584135437	hypothetical protein FVEG_05788 [Fusarium verticillioides 7600]	EWG44800.1	91.74	218	18	0	1	218	218	100	1	218	6e-117	423
258	591410189	hypothetical protein FOCG_12723 [Fusarium oxysporum f. sp. radicis-lycopersici 26381]	EXL45326.1	77	700	130	6	10	679	770	87.013	44	742	0	1100
259	590023066	hypothetical protein FOMG_18384 [Fusarium oxysporum f. sp. melonis 26406]	EXK24924.1	82.77	441	75	1	1	440	440	100	1	441	0	783
260	590023064	hypothetical protein FOMG_18382 [Fusarium oxysporum f. sp. melonis 26406]	EXK24922.1	82.23	619	105	1	1	619	619	100	1	614	0	1055
261	587714406	hypothetical protein FOWG_10839 [Fusarium oxysporum f. sp. lycopersici MN25]	EWZ85743.1	85.62	292	42	0	1	292	292	100	1	292	9e-149	529
262	587686251	hypothetical protein FOZG_14372 [Fusarium oxysporum Fo47]	EWZ32856.1	81.56	553	66	3	1	517	517	100	1	553	0	922
263	587709742	salicylate hydroxylase [Fusarium oxysporum f. sp. lycopersici MN25]	EWZ81079.1	90.09	454	24	2	1	433	433	100	1	454	0	845
264	587708654	hypothetical protein FOWG_16011 [Fusarium oxysporum f. sp. lycopersici MN25]	EWZ79991.1	94.89	587	30	0	1	587	610	96.2295	1	587	0	1157
266	829112907	3-octaprenyl-4-hydroxybenzoate carboxy-lyase [Fusarium fujikuroi]	KLO89341.1	95.21	543	26	0	1	543	543	100	1	543	0	1058
267	829112906	putative PAD1-phenylacrylic acid decarboxylase [Fusarium fujikuroi]	KLO89340.1	92.19	269	21	0	2	270	270	99.6296	3	271	4e-142	507
268	584135444	hypothetical protein FVEG_05793 [Fusarium verticillioides 7600]	EWG44807.1	87.05	610	41	1	84	655	655	87.3282	156	765	0	1065
269	584135445	NAD-dependent aldehyde dehydrogenase [Fusarium verticillioides 7600]	EWG44808.1	96.6	500	17	0	1	500	500	100	1	500	0	1013
270	584135446	hypothetical protein FVEG_05795 [Fusarium verticillioides 7600]	EWG44809.1	87.86	618	26	2	1	590	590	100	1	597	0	1100
271	517314532	related to dimethylaniline monooxygenase [Fusarium fujikuroi IMI 58289]	CCT66652.1	92.49	559	22	1	1	539	539	100	1	559	0	1072
272	517314533	related to D-arabinitol 2-dehydrogenase [Fusarium fujikuroi IMI 58289]	CCT66653.1	96.73	275	9	0	1	275	275	100	1	275	1e-157	558
273	584135449	carboxymethylenebutenolidase [Fusarium verticillioides 7600]	EWG44812.1	93.95	347	21	0	1	347	347	100	65	411	0	687
274	829112899	putative MFS transporter [Fusarium fujikuroi]	KLO89333.1	94.24	521	30	0	1	521	521	100	1	521	0	1020
277	587657419	hypothetical protein FOYG_17104 [Fusarium oxysporum FOSC 3-a]	EWY79816.1	87.85	214	26	0	1	214	217	98.6175	1	214	3e-91	337
278	587732652	hypothetical protein FOVG_18240 [Fusarium oxysporum f. sp. pisi HDV247]	EXA30368.1	88.79	107	12	0	1	107	107	100	1	107	1e-51	204
279	590048598	hypothetical protein FOQG_19119 [Fusarium oxysporum f. sp. raphani 54005]	EXK76122.1	84.62	117	15	1	14	130	130	90	14	127	5e-52	206
281	584144714	hypothetical protein FVEG_12309 [Fusarium verticillioides 7600]	EWG53994.1	61.22	312	54	6	50	294	294	83.3333	1	312	5e-90	334
282	829125014	Uncharacterized protein LW94_1317 [Fusarium fujikuroi]	KLP00407.1	97.9	428	9	0	1	428	428	100	1	428	0	857
283	829105628	Uncharacterized protein LW93_9494 [Fusarium fujikuroi]	KLO82302.1	82.96	270	46	0	1	270	270	100	1	270	4e-132	474
284	587739095	hypothetical protein FOVG_12692 [Fusarium oxysporum f. sp. pisi HDV247]	EXA36811.1	84.02	219	35	0	1	219	219	100	213	431	5e-103	376
285	829153622	Uncharacterized protein LW94_13149 [Fusarium fujikuroi]	KLP20904.1	90.28	144	14	0	1	144	145	99.3103	1	144	7e-72	271
286	829126909	Uncharacterized protein Y057_2882 [Fusarium fujikuroi]	KLP01999.1	84.11	107	17	0	11	117	117	91.453	281	387	7e-45	182
287	591432296	hypothetical protein FOPG_17949 [Fusarium oxysporum f. sp. conglutinans race 2 54008]	EXL65846.1	70.62	337	72	1	1	310	310	100	1	337	1e-133	479
288	829126911	Uncharacterized protein Y057_2884 [Fusarium fujikuroi]	KLP02001.1	98.96	386	4	0	1	386	386	100	1	386	0	785
289	587707114	hypothetical protein FOWG_17315 [Fusarium oxysporum f. sp. lycopersici MN25]	EWZ78451.1	77.58	165	30	1	1	158	158	100	1	165	4e-71	269
290	902746299	hypothetical protein FOXG_22080 [Fusarium oxysporum f. sp. lycopersici 4287]	KNB17866.1	90.38	260	25	0	1	260	260	100	1	260	1e-135	486
291	902746300	hypothetical protein FOXG_15591 [Fusarium oxysporum f. sp. lycopersici 4287]	KNB17867.1	84.99	686	97	4	1	680	681	99.8532	1	686	0	1195
292	587682707	hypothetical protein FOZG_17174 [Fusarium oxysporum Fo47]	EWZ29312.1	74.38	121	31	0	1	121	121	100	1	121	2e-42	174
293	591404673	hypothetical protein FOCG_17612 [Fusarium oxysporum f. sp. radicis-lycopersici 26381]	EXL39810.1	67	397	131	0	1	397	397	100	4	400	6e-149	530
294	902746303	hypothetical protein FOXG_22082 [Fusarium oxysporum f. sp. lycopersici 4287]	KNB17870.1	88.15	540	46	1	1	540	540	100	1	522	0	956
295	902746812	hypothetical protein FOXG_16052 [Fusarium oxysporum f. sp. lycopersici 4287]	KNB18379.1	84.87	152	22	1	8	158	160	94.375	1	152	5e-64	245
296	590025577	hypothetical protein FOMG_15988 [Fusarium oxysporum f. sp. melonis 26406]	EXK27435.1	83.5	497	82	0	3	499	499	99.5992	30	526	0	881
299	342885751	hypothetical protein FOXB_03765 [Fusarium oxysporum Fo5176]	EGU85718.1	86.34	322	44	0	1	322	325	99.0769	1	322	2e-169	598
303	584133163	hypothetical protein FVEG_04312 [Fusarium verticillioides 7600]	EWG42536.1	83.11	752	71	3	1	723	723	100	1	725	0	1193
304	590024465	hypothetical protein FOMG_17068 [Fusarium oxysporum f. sp. melonis 26406]	EXK26323.1	89.47	655	68	1	1	655	655	100	1	654	0	1234
305	584133160	acid phosphatase [Fusarium verticillioides 7600]	EWG42533.1	88.03	493	29	3	10	472	472	98.0932	1	493	0	876
306	584133159	hypothetical protein FVEG_04309 [Fusarium verticillioides 7600]	EWG42532.1	67.73	722	95	7	1	590	590	100	1	716	0	915
307	584133158	hypothetical protein FVEG_04308 [Fusarium verticillioides 7600]	EWG42531.1	93.5	554	36	0	1	554	554	100	1	554	0	1098
308	584133157	hypothetical protein FVEG_04307 [Fusarium verticillioides 7600]	EWG42530.1	84.84	488	72	1	1	488	488	100	1	486	0	867
309	829152106	Uncharacterized protein LW94_13376 [Fusarium fujikuroi]	KLP19970.1	83.58	481	61	2	1	463	464	99.7845	1	481	0	825
311	342888895	hypothetical protein FOXB_01372 [Fusarium oxysporum Fo5176]	EGU88110.1	94.99	599	30	0	1	599	599	100	1	599	0	1203
312	584133152	hypothetical protein FVEG_04303 [Fusarium verticillioides 7600]	EWG42525.1	81.44	776	143	1	43	817	817	94.8592	1	776	0	1299
313	587680513	hypothetical protein FOYG_02053 [Fusarium oxysporum FOSC 3-a]	EWZ02831.1	91.48	317	26	1	1	316	316	100	1	317	7e-173	609
314	829104636	Uncharacterized protein LW93_8073 [Fusarium fujikuroi]	KLO81364.1	97.17	318	9	0	1	318	318	100	1	318	0	652
315	475677486	hypothetical protein FOC4_g10000956 [Fusarium oxysporum f. sp. cubense race 4]	EMT74494.1	78.25	662	127	4	1	645	645	100	1	662	0	1048
316	829104638	Uncharacterized protein LW93_8075 [Fusarium fujikuroi]	KLO81366.1	86.87	335	38	2	1	330	330	100	1	334	3e-151	538
317	584133175	hypothetical protein FVEG_04323 [Fusarium verticillioides 7600]	EWG42548.1	98.46	520	8	0	1	520	520	100	1	520	0	1048
318	475677483	L-sorbosone dehydrogenase [Fusarium oxysporum f. sp. cubense race 4]	EMT74491.1	88.75	480	53	1	1	479	479	100	1	480	0	860
319	591483120	hypothetical protein FOTG_18223 [Fusarium oxysporum f. sp. vasinfectum 25433]	EXM13323.1	80.81	1428	254	4	3	1412	1476	95.5285	8	1433	0	2417
321	751346270	alternative mitochondrial [Fusarium avenaceum]	KIL83992.1	79.93	279	55	1	2	280	280	99.6429	75	352	2e-136	488
322	829104641	Uncharacterized protein LW93_8078 [Fusarium fujikuroi]	KLO81369.1	95.73	539	23	0	45	583	583	92.4528	1	539	0	1080
323	829152116	Uncharacterized protein LW94_13386 [Fusarium fujikuroi]	KLP19980.1	86.59	164	22	0	1	164	164	100	1	164	2e-83	310
326	342890365	hypothetical protein FOXB_00282 [Fusarium oxysporum Fo5176]	EGU89188.1	76.13	243	15	1	1	200	200	100	1	243	5e-99	363
327	587702299	hypothetical protein FOZG_04375 [Fusarium oxysporum Fo47]	EWZ48904.1	78.64	412	36	4	1	360	360	100	1	412	0	648
328	591486146	hypothetical protein FOTG_15702 [Fusarium oxysporum f. sp. vasinfectum 25433]	EXM15987.1	96.74	491	16	0	1	491	494	99.3927	1	491	0	981
329	591461654	hypothetical protein FOIG_13851 [Fusarium oxysporum f. sp. cubense tropical race 4 54006]	EXL93206.1	71.68	279	67	3	1	273	274	99.635	1	273	4e-88	328
330	584133187	hypothetical protein FVEG_04329 [Fusarium verticillioides 7600]	EWG42560.1	91.82	489	40	0	1	489	489	100	1	489	0	926
331	475677469	hypothetical protein FOC4_g10000939, partial [Fusarium oxysporum f. sp. cubense race 4]	EMT74477.1	86.16	289	38	1	1	287	287	100	5	293	6e-141	503
332	829136860	Uncharacterized protein Y057_2661 [Fusarium fujikuroi]	KLP10182.1	90.58	382	36	0	1	382	382	100	1	382	0	723
333	829136859	Uncharacterized protein Y057_2660 [Fusarium fujikuroi]	KLP10181.1	93.44	244	16	0	1	244	245	99.5918	1	244	7e-134	479
334	475677651	Protein PLANT CADMIUM RESISTANCE 3 [Fusarium oxysporum f. sp. cubense race 4]	EMT74632.1	99.22	128	1	0	1	128	129	99.2248	1	128	2e-69	264
335	902749229	hypothetical protein FOXG_17709 [Fusarium oxysporum f. sp. lycopersici 4287]	KNB20796.1	94.21	518	24	1	1	512	521	98.2726	1	518	0	1021
336	591416476	hypothetical protein FOCG_07445 [Fusarium oxysporum f. sp. radicis-lycopersici 26381]	EXL51613.1	86.1	439	55	2	1	433	438	98.8584	1	439	0	790
337	584133198	hypothetical protein FVEG_04337 [Fusarium verticillioides 7600]	EWG42571.1	89.47	323	18	1	1	307	307	100	1	323	5e-165	583
338	591461678	hypothetical protein FOIG_13875 [Fusarium oxysporum f. sp. cubense tropical race 4 54006]	EXL93230.1	80.73	301	42	1	1	285	286	99.6503	1	301	1e-141	506
340	408392604	hypothetical protein FPSE_07809 [Fusarium pseudograminearum CS3096]	EKJ71955.1	64.2	500	178	1	1	500	524	95.4198	620	1118	0	642
343	829148750	Uncharacterized protein LW94_1124 [Fusarium fujikuroi]	KLP18045.1	94.27	524	12	1	1	506	506	100	1	524	0	1005
344	584133200	hypothetical protein FVEG_04339 [Fusarium verticillioides 7600]	EWG42573.1	95.35	258	8	1	1	258	258	100	1	254	2e-141	504
346	902733473	hypothetical protein FOXG_19481 [Fusarium oxysporum f. sp. lycopersici 4287]	KNB05042.1	91.88	714	41	1	1	697	697	100	1	714	0	1325
349	829136851	Uncharacterized protein Y057_2652 [Fusarium fujikuroi]	KLP10173.1	75.71	387	94	0	1	387	389	99.4859	1	387	5e-170	600
350	477519651	hypothetical protein FOC1_g10004068 [Fusarium oxysporum f. sp. cubense race 1]	ENH71821.1	84.73	262	40	0	1	262	262	100	1	262	8e-123	442
351	591435596	hypothetical protein FOPG_15413 [Fusarium oxysporum f. sp. conglutinans race 2 54008]	EXL68526.1	94.2	362	21	0	1	362	362	100	1	362	0	697
352	590044394	hypothetical protein FOMG_04458 [Fusarium oxysporum f. sp. melonis 26406]	EXK46252.1	94.43	341	19	0	1	341	341	100	1	341	0	683
353	584133207	hypothetical protein FVEG_04345 [Fusarium verticillioides 7600]	EWG42580.1	96.7	546	18	0	1	546	546	100	1	546	0	1110
354	829153872	Uncharacterized protein LW94_9578 [Fusarium fujikuroi]	KLP21052.1	98.15	486	9	0	1	486	486	100	1	486	0	987
356	584133213	hypothetical protein FVEG_04350 [Fusarium verticillioides 7600]	EWG42586.1	84.45	566	73	2	1	565	565	100	1	552	0	962
357	902733482	hypothetical protein FOXG_07418 [Fusarium oxysporum f. sp. lycopersici 4287]	KNB05051.1	67.36	671	203	2	1	656	709	92.5247	1	670	0	930
358	587680466	hypothetical protein FOYG_02008 [Fusarium oxysporum FOSC 3-a]	EWZ02784.1	80.26	841	159	4	1	836	836	100	1	839	0	1294
359	584133220	tyrosyl-tRNA synthetase [Fusarium verticillioides 7600]	EWG42593.1	85.14	370	55	0	1	370	374	98.9305	1	370	0	655
360	584133221	hypothetical protein FVEG_04357 [Fusarium verticillioides 7600]	EWG42594.1	93.68	190	12	0	1	190	190	100	1	190	4e-101	370
361	166797275	putative maltase MLT1 [Fusarium verticillioides]	ABY89282.1	92.58	593	44	0	1	593	593	100	51	643	0	1167
362	584133223	hypothetical protein FVEG_04359 [Fusarium verticillioides 7600]	EWG42596.1	83.6	445	40	1	1	412	412	100	1	445	0	764
364	584133224	hypothetical protein FVEG_04360 [Fusarium verticillioides 7600]	EWG42597.1	75.87	286	50	2	16	282	282	94.6809	2	287	2e-120	435
365	590044368	NAD-dependent aldehyde dehydrogenase [Fusarium oxysporum f. sp. melonis 26406]	EXK46226.1	95.18	415	20	0	1	415	416	99.7596	1	415	0	828
366	902734673	hypothetical protein FOXG_07018 [Fusarium oxysporum f. sp. lycopersici 4287]	KNB06242.1	85.85	318	25	1	1	298	298	100	83	400	1e-156	555
367	342872936	hypothetical protein FOXB_14302 [Fusarium oxysporum Fo5176]	EGU75205.1	92.26	297	23	0	1	297	297	100	1	297	1e-165	585
368	587702254	hypothetical protein FOZG_04331 [Fusarium oxysporum Fo47]	EWZ48859.1	82.44	262	20	2	1	236	237	99.5781	77	338	9e-123	442
369	475670551	hypothetical protein FOC4_g10012300 [Fusarium oxysporum f. sp. cubense race 4]	EMT67904.1	86.32	95	13	0	1	95	101	94.0594	1	95	7e-43	175
370	829104684	Uncharacterized protein LW93_8121 [Fusarium fujikuroi]	KLO81412.1	93.33	285	19	0	1	285	285	100	155	439	1e-150	535
371	591438798	hypothetical protein FOPG_12745 [Fusarium oxysporum f. sp. conglutinans race 2 54008]	EXL71521.1	93.18	132	9	0	1	132	133	99.2481	1	132	5e-67	256
372	584133233	hypothetical protein FVEG_04366 [Fusarium verticillioides 7600]	EWG42606.1	83.82	204	33	0	1	204	205	99.5122	1	204	4e-97	356
373	591458618	hypothetical protein FOIG_16433 [Fusarium oxysporum f. sp. cubense tropical race 4 54006]	EXL90313.1	86.53	995	133	1	1	994	1013	98.1244	1	995	0	1709
374	584133235	hypothetical protein FVEG_04368 [Fusarium verticillioides 7600]	EWG42608.1	90.53	771	28	2	1	726	727	99.8624	1	771	0	1417
375	584133236	hypothetical protein FVEG_04369 [Fusarium verticillioides 7600]	EWG42609.1	90.62	629	59	0	1	629	629	100	1	629	0	1154
376	829136820	Uncharacterized protein Y057_2620 [Fusarium fujikuroi]	KLP10142.1	99.72	356	1	0	1	356	356	100	199	554	0	743
377	829104692	Uncharacterized protein LW93_8130 [Fusarium fujikuroi]	KLO81420.1	92.86	224	16	0	1	224	224	100	1	224	1e-116	422
378	584133242	hypothetical protein FVEG_04374 [Fusarium verticillioides 7600]	EWG42615.1	97.02	369	11	0	1	369	369	100	1	369	0	753
379	587680445	hypothetical protein FOYG_01986 [Fusarium oxysporum FOSC 3-a]	EWZ02763.1	64.38	612	164	6	1	558	573	97.3822	1	612	0	739
380	829136817	Uncharacterized protein Y057_2617 [Fusarium fujikuroi]	KLP10139.1	87.29	354	43	1	1	354	354	100	1	352	0	641
383	829104698	Uncharacterized protein LW93_8136 [Fusarium fujikuroi]	KLO81426.1	89.08	357	39	0	1	357	358	99.7207	1	357	0	676
384	829136814	Uncharacterized protein Y057_2614 [Fusarium fujikuroi]	KLP10136.1	81.74	597	74	3	50	611	611	91.9804	2	598	0	989
385	477519618	hypothetical protein FOC1_g10004035 [Fusarium oxysporum f. sp. cubense race 1]	ENH71788.1	79.08	239	49	1	7	244	245	97.1429	2	240	9e-108	392
388	584133258	hypothetical protein FVEG_15470 [Fusarium verticillioides 7600]	EWG42631.1	79.89	358	45	1	1	331	331	100	1	358	9e-165	583
390	587722573	hypothetical protein FOWG_06552 [Fusarium oxysporum f. sp. lycopersici MN25]	EWZ93910.1	95.33	750	35	0	1	750	750	100	1	750	0	1475
391	829136803	Uncharacterized protein Y057_2603 [Fusarium fujikuroi]	KLP10125.1	98.04	510	10	0	1	510	510	100	1	510	0	1017
392	587680438	hypothetical protein FOYG_01980 [Fusarium oxysporum FOSC 3-a]	EWZ02756.1	96	500	8	1	1	488	488	100	1	500	0	983
393	584133257	hypothetical protein FVEG_15469 [Fusarium verticillioides 7600]	EWG42630.1	83.17	808	114	2	1	789	789	100	1	805	0	1376
396	584133250	hypothetical protein FVEG_04382 [Fusarium verticillioides 7600]	EWG42623.1	88.92	812	89	1	1	811	811	100	1	812	0	1447
397	475670573	6-hydroxy-D-nicotine oxidase [Fusarium oxysporum f. sp. cubense race 4]	EMT67926.1	86.67	465	46	2	1	449	449	100	1	465	0	828
398	584133262	hypothetical protein FVEG_04390 [Fusarium verticillioides 7600]	EWG42635.1	82.86	420	49	1	1	397	398	99.7487	1	420	0	696
399	590069087	hypothetical protein FOQG_02054 [Fusarium oxysporum f. sp. raphani 54005]	EXK96611.1	64.71	666	178	2	1	609	609	100	1	666	0	848
400	342872528	hypothetical protein FOXB_14597 [Fusarium oxysporum Fo5176]	EGU74887.1	90.51	706	50	1	1	689	689	100	1	706	0	1335
401	342872527	hypothetical protein FOXB_14596 [Fusarium oxysporum Fo5176]	EGU74886.1	90.91	220	20	0	1	220	220	100	510	729	9e-115	416
402	584133268	aldehyde dehydrogenase (NAD+) [Fusarium verticillioides 7600]	EWG42641.1	97.16	493	14	0	1	493	493	100	1	493	0	996
403	587680429	copper amine oxidase 1 [Fusarium oxysporum FOSC 3-a]	EWZ02747.1	91.22	672	17	1	1	630	630	100	1	672	0	1260
404	584133266	hypothetical protein FVEG_04393 [Fusarium verticillioides 7600]	EWG42639.1	95.84	529	22	0	1	529	529	100	1	529	0	1017
405	584133265	hypothetical protein FVEG_04392 [Fusarium verticillioides 7600]	EWG42638.1	92.38	709	21	2	1	676	676	100	1	709	0	1347
406	584133264	seryl-tRNA synthetase [Fusarium verticillioides 7600]	EWG42637.1	76.27	413	66	2	2	386	393	97.9644	35	443	1e-177	626
407	584133271	hypothetical protein FVEG_04399 [Fusarium verticillioides 7600]	EWG42644.1	97.26	365	10	0	1	365	365	100	1	365	0	726
408	902733540	hypothetical protein FOXG_07469 [Fusarium oxysporum f. sp. lycopersici 4287]	KNB05109.1	95.23	398	19	0	1	398	398	100	1	398	0	760
409	829136787	Uncharacterized protein Y057_2587 [Fusarium fujikuroi]	KLP10109.1	90.11	263	9	2	1	246	246	100	1	263	2e-132	474
410	829104741	putative SERINE-TYPE CARBOXYPEPTIDASE F PRECURSOR [Fusarium fujikuroi]	KLO81469.1	96.87	575	17	1	1	574	574	100	1	575	0	1150
411	587706265	hypothetical protein FOWG_18003 [Fusarium oxysporum f. sp. lycopersici MN25]	EWZ77602.1	61.74	677	253	4	1	677	687	98.5444	1	671	0	880
414	590048977	hypothetical protein FOQG_18758 [Fusarium oxysporum f. sp. raphani 54005]	EXK76501.1	94.67	300	16	0	1	300	300	100	1	300	2e-166	588
415	342874956	hypothetical protein FOXB_12639 [Fusarium oxysporum Fo5176]	EGU76858.1	74.06	979	172	16	37	949	949	96.2065	563	1525	0	1359
416	829104736	Uncharacterized protein LW93_8174 [Fusarium fujikuroi]	KLO81464.1	93.52	525	21	1	1	512	513	99.8051	1	525	0	1020
417	477507366	Origin recognition complex subunit 3 [Fusarium oxysporum f. sp. cubense race 1]	ENH60660.1	96.29	701	26	0	1	701	701	100	1	701	0	1381
418	584128527	hypothetical protein FVEG_01339 [Fusarium verticillioides 7600]	EWG37946.1	93.58	576	20	1	1	559	559	100	1	576	0	967
419	587755868	hypothetical protein FOVG_01345 [Fusarium oxysporum f. sp. pisi HDV247]	EXA53584.1	97.08	2195	33	2	1	2164	2172	99.6317	1	2195	0	4279
420	342876152	hypothetical protein FOXB_11674 [Fusarium oxysporum Fo5176]	EGU77810.1	97.29	516	14	0	1	516	516	100	1	516	0	977
421	587755865	replication factor C subunit 2 [Fusarium oxysporum f. sp. pisi HDV247]	EXA53581.1	93.19	382	8	1	1	364	364	100	1	382	0	722
422	587702198	CMGC/SRPK protein kinase [Fusarium oxysporum Fo47]	EWZ48803.1	77.59	415	74	2	1	396	396	100	1	415	0	665
423	475677313	hypothetical protein FOC4_g10002424 [Fusarium oxysporum f. sp. cubense race 4]	EMT74323.1	91.6	393	33	0	33	425	426	92.2535	2	394	0	762
424	590024521	hypothetical protein FOMG_17054 [Fusarium oxysporum f. sp. melonis 26406]	EXK26379.1	82.22	540	74	2	1	518	518	100	1	540	0	891
425	590055379	hypothetical protein FOQG_12736 [Fusarium oxysporum f. sp. raphani 54005]	EXK82903.1	85.66	565	58	2	1	543	543	100	1	564	0	1005
427	591487291	hypothetical protein FOTG_14700 [Fusarium oxysporum f. sp. vasinfectum 25433]	EXM17068.1	83.39	277	46	0	1	277	277	100	1	277	2e-139	498
428	587686438	hypothetical protein FOZG_14540 [Fusarium oxysporum Fo47]	EWZ33043.1	93.66	268	17	0	1	268	274	97.8102	1	268	3e-149	530
430	587734017	hypothetical protein FOVG_16972 [Fusarium oxysporum f. sp. pisi HDV247]	EXA31733.1	85.61	278	40	0	1	278	282	98.5816	1	278	2e-139	498
431	591409995	hypothetical protein FOCG_12544 [Fusarium oxysporum f. sp. radicis-lycopersici 26381]	EXL45132.1	71.28	188	54	0	1	188	193	97.4093	326	513	5e-72	273
432	902733557	hypothetical protein FOXG_07484 [Fusarium oxysporum f. sp. lycopersici 4287]	KNB05126.1	69.4	464	106	5	8	440	540	80.1852	5	463	1e-173	613
433	587680403	malate dehydrogenase, NAD-dependent [Fusarium oxysporum FOSC 3-a]	EWZ02721.1	86.28	328	42	1	1	328	328	100	1	325	7e-161	570
434	829146676	putative hydroxyacid dehydrogenase [Fusarium fujikuroi]	KLP16808.1	88.93	244	27	0	5	248	248	98.3871	106	349	2e-119	431
435	475670603	Glyoxylate reductase 1 [Fusarium oxysporum f. sp. cubense race 4]	EMT67956.1	83.08	65	11	0	1	65	72	90.2778	1	65	6e-26	119
437	584133289	fumarylacetoacetase [Fusarium verticillioides 7600]	EWG42662.1	98.37	429	7	0	1	429	429	100	1	429	0	875
438	584133290	hypothetical protein FVEG_04415 [Fusarium verticillioides 7600]	EWG42663.1	100	106	0	0	1	106	106	100	1	106	7e-57	221
439	584133291	hypothetical protein FVEG_04416 [Fusarium verticillioides 7600]	EWG42664.1	97.26	621	16	1	1	620	627	98.8836	1	621	0	1234
440	517314801	related to O-methylsterigmatocystin oxidoreductase [Fusarium fujikuroi IMI 58289]	CCT66799.1	98.46	519	8	0	1	519	519	100	1	519	0	1063
442	587722522	hypothetical protein FOWG_06504 [Fusarium oxysporum f. sp. lycopersici MN25]	EWZ93859.1	80.4	643	103	3	1	620	620	100	1	643	0	1058
443	829104750	putative beta-glucanase [Fusarium fujikuroi]	KLO81478.1	99.19	491	4	0	1	491	491	100	1	491	0	1011
444	584133297	hypothetical protein FVEG_04422 [Fusarium verticillioides 7600]	EWG42670.1	89.89	465	25	2	1	443	443	100	1	465	0	837
445	829120773	novobiocin biosynthesis protein novR [Fusarium fujikuroi]	KLO96841.1	98	300	4	1	1	298	298	100	1	300	2e-174	614
446	584133299	hypothetical protein FVEG_04424 [Fusarium verticillioides 7600]	EWG42672.1	87.88	619	59	2	1	607	607	100	1	615	0	1129
447	584133300	hypothetical protein FVEG_04425 [Fusarium verticillioides 7600]	EWG42673.1	86.09	338	35	1	1	326	326	100	1	338	7e-170	600
448	587735077	hypothetical protein FOVG_15943 [Fusarium oxysporum f. sp. pisi HDV247]	EXA32793.1	67.11	599	174	8	6	585	585	99.1453	2	596	0	776
449	591476189	hypothetical protein FOIG_03892 [Fusarium oxysporum f. sp. cubense tropical race 4 54006]	EXM07361.1	86.28	481	23	2	1	438	438	100	1495	1975	0	850
450	591476189	hypothetical protein FOIG_03892 [Fusarium oxysporum f. sp. cubense tropical race 4 54006]	EXM07361.1	61.95	1490	399	21	26	1369	1370	98.1022	1	1468	0	1644
451	584133304	hypothetical protein FVEG_15478 [Fusarium verticillioides 7600]	EWG42677.1	78.54	769	165	0	1	769	769	100	1	769	0	1253
452	584133308	hypothetical protein FVEG_04431 [Fusarium verticillioides 7600]	EWG42681.1	93.31	284	19	0	1	284	284	100	1	284	4e-158	560
455	584133313	hypothetical protein FVEG_04435 [Fusarium verticillioides 7600]	EWG42686.1	95.83	384	16	0	1	384	384	100	1	384	0	757
456	829104764	uncharacterized protein LW93_8202 [Fusarium fujikuroi]	KLO81492.1	87.92	149	18	0	1	149	153	97.3856	126	274	7e-71	268
457	829104764	uncharacterized protein LW93_8202 [Fusarium fujikuroi]	KLO81492.1	89.66	87	9	0	1	87	87	100	1	87	9e-41	168
458	591476179	hypothetical protein FOIG_03882 [Fusarium oxysporum f. sp. cubense tropical race 4 54006]	EXM07351.1	73.74	358	87	3	5	358	358	98.8827	4	358	1e-155	553
459	751355961	alpha-n-arabinofuranosidase 2 [Fusarium avenaceum]	KIL93683.1	60.67	328	74	4	20	293	293	93.5154	22	348	3e-108	394
460	829144647	uncharacterized protein LW94_5275 [Fusarium fujikuroi]	KLP15503.1	92.65	245	15	1	1	245	246	99.5935	1	242	3e-100	367
461	584133318	hypothetical protein FVEG_04440 [Fusarium verticillioides 7600]	EWG42691.1	96.63	415	14	0	1	415	415	100	1	415	0	828
462	829122382	ankyrin 1 [Fusarium fujikuroi]	KLO98299.1	77.96	1792	321	7	1	1724	1724	100	1	1786	0	2906
463	517314824	uncharacterized protein FFUJ_12988 [Fusarium fujikuroi IMI 58289]	CCT66822.1	93.1	290	20	0	3	292	293	98.9761	4	293	5e-149	530
464	517314825	related to microbial serine proteinase [Fusarium fujikuroi IMI 58289]	CCT66823.1	96.41	1004	36	0	1	1004	1004	100	1	1004	0	2005
465	342884861	hypothetical protein FOXB_04460 [Fusarium oxysporum Fo5176]	EGU85040.1	78.04	378	80	1	1	375	396	94.697	1	378	4e-175	617
466	517314827	probable sugar transport protein STL1 [Fusarium fujikuroi IMI 58289]	CCT66825.1	99.07	540	5	0	1	540	540	100	1	540	0	1105
467	587680364	hypothetical protein FOYG_01911 [Fusarium oxysporum FOSC 3-a]	EWZ02682.1	64.07	270	83	4	21	284	284	92.9577	21	282	2e-94	348
470	584133327	hypothetical protein FVEG_15481 [Fusarium verticillioides 7600]	EWG42700.1	97.17	106	3	0	1	106	106	100	1	106	6e-55	215
471	591476168	hypothetical protein FOIG_03871 [Fusarium oxysporum f. sp. cubense tropical race 4 54006]	EXM07340.1	90.53	454	35	3	1	446	460	96.9565	1	454	0	825
472	342884865	hypothetical protein FOXB_04464 [Fusarium oxysporum Fo5176]	EGU85044.1	93.09	391	0	1	1	364	364	100	1	391	0	734
473	584133329	glucose-6-phosphate isomerase [Fusarium verticillioides 7600]	EWG42702.1	98.91	552	6	0	1	552	552	100	1	552	0	1129
474	342884867	hypothetical protein FOXB_04466 [Fusarium oxysporum Fo5176]	EGU85046.1	95.75	635	2	1	1	610	610	100	1	635	0	1253
475	584133333	hypothetical protein FVEG_04454 [Fusarium verticillioides 7600]	EWG42706.1	96.48	824	8	1	1	803	820	97.9268	1	824	0	1592
479	584133340	murein transglycosylase [Fusarium verticillioides 7600]	EWG42713.1	97.6	250	6	0	1	250	250	100	1	250	4e-139	497
480	591504933	hypothetical protein FOTG_02662 [Fusarium oxysporum f. sp. vasinfectum 25433]	EXM34256.1	96.48	341	12	0	1	341	341	100	1	341	0	645
481	591504932	hypothetical protein FOTG_02661 [Fusarium oxysporum f. sp. vasinfectum 25433]	EXM34255.1	92.6	311	23	0	1	311	314	99.0446	1	311	1e-163	579
482	587680342	hypothetical protein FOYG_01890 [Fusarium oxysporum FOSC 3-a]	EWZ02660.1	82.63	357	62	0	1	357	357	100	1	357	6e-174	613
483	829104790	uncharacterized protein LW93_8229 [Fusarium fujikuroi]	KLO81518.1	76.31	363	40	2	1	317	317	100	1	363	4e-151	537
485	829104792	Uncharacterized protein LW93_8231 [Fusarium fujikuroi]	KLO81520.1	67.82	693	164	4	6	642	642	99.2212	6	695	0	952
486	587702125	hypothetical protein FOZG_04211 [Fusarium oxysporum Fo47]	EWZ48730.1	98.8	250	3	0	1	250	252	99.2063	1	250	4e-138	493
487	584133349	hypothetical protein FVEG_04466 [Fusarium verticillioides 7600]	EWG42722.1	90.31	320	2	2	1	291	291	100	1	320	3e-151	537
488	584133346	GTP cyclohydrolase I [Fusarium verticillioides 7600]	EWG42719.1	89.21	315	5	1	1	286	286	100	1	315	3e-137	491
489	902733623	histone demethylase JARID1 [Fusarium oxysporum f. sp. lycopersici 4287]	KNB05192.1	90.97	1738	39	4	1	1620	1620	100	1	1738	0	3140
491	584133354	hypothetical protein FVEG_04472 [Fusarium verticillioides 7600]	EWG42727.1	94.41	501	11	1	1	484	484	100	1	501	0	953
492	342884727	hypothetical protein FOXB_04498 [Fusarium oxysporum Fo5176]	EGU84917.1	95.52	402	0	1	1	384	384	100	1	402	0	787
493	584133356	hypothetical protein FVEG_15485 [Fusarium verticillioides 7600]	EWG42729.1	84.67	137	14	1	1	130	130	100	1	137	1e-60	234
494	584133357	hypothetical protein FVEG_04474 [Fusarium verticillioides 7600]	EWG42730.1	92.73	495	11	1	1	470	470	100	35	529	0	910
495	584133358	hypothetical protein FVEG_04475 [Fusarium verticillioides 7600]	EWG42731.1	75.34	653	132	4	1	643	643	100	1	634	0	996
496	342884731	hypothetical protein FOXB_04502 [Fusarium oxysporum Fo5176]	EGU84921.1	99.31	291	2	0	1	291	293	99.3174	1	291	9e-168	592
497	342884731	hypothetical protein FOXB_04502 [Fusarium oxysporum Fo5176]	EGU84921.1	99.53	212	1	0	1	212	212	100	318	529	5e-121	436
498	584133361	preprotein translocase subunit YidC [Fusarium verticillioides 7600]	EWG42734.1	84.09	484	20	2	1	427	427	100	1	484	0	813
499	517314863	related to Mitochondrial import protein 1 [Fusarium fujikuroi IMI 58289]	CCT66858.1	99.19	123	1	0	1	123	123	100	1	123	2e-64	247
500	342884734	hypothetical protein FOXB_04505 [Fusarium oxysporum Fo5176]	EGU84924.1	97.31	409	9	1	1	409	409	100	1	407	0	722
501	342884735	hypothetical protein FOXB_04506 [Fusarium oxysporum Fo5176]	EGU84925.1	99.16	356	3	0	1	356	356	100	1	356	0	731
502	829104810	uncharacterized protein LW93_8249 [Fusarium fujikuroi]	KLO81538.1	90.6	926	80	1	1	926	926	100	1	919	0	1740
503	829104811	uncharacterized protein LW93_8250 [Fusarium fujikuroi]	KLO81539.1	92.43	581	44	0	1	581	581	100	1	581	0	1130
504	517314868	uncharacterized protein FFUJ_13031 [Fusarium fujikuroi IMI 58289]	CCT66863.1	97.62	42	1	0	1	42	43	97.6744	1	42	5e-15	82.8
505	517314869	related to cercosporin resistance protein [Fusarium fujikuroi IMI 58289]	CCT66864.1	89.88	603	11	1	1	553	553	100	1	603	0	1073
506	517314870	related to retinol dehydrogenase 13 [Fusarium fujikuroi IMI 58289]	CCT66865.1	98.6	358	5	0	1	358	359	99.7214	1	358	0	740
507	342884741	hypothetical protein FOXB_04512 [Fusarium oxysporum Fo5176]	EGU84931.1	93.13	626	9	1	1	592	592	100	1	626	0	1162
508	517314872	related to enoyl-CoA hydratase [Fusarium fujikuroi IMI 58289]	CCT66867.1	96.72	274	9	0	1	274	274	100	1	274	1e-154	549
509	342884743	hypothetical protein FOXB_04514 [Fusarium oxysporum Fo5176]	EGU84933.1	92.71	768	10	3	1	726	726	100	1	764	0	1379
510	829133347	uncharacterized protein Y057_14620 [Fusarium fujikuroi]	KLP07263.1	93.08	260	14	1	1	260	260	100	1	256	1e-136	488
511	517314875	uncharacterized protein FFUJ_13038 [Fusarium fujikuroi IMI 58289]	CCT66870.1	96.49	741	22	1	1	737	737	100	1	741	0	1398
513	584133376	hypothetical protein FVEG_04490 [Fusarium verticillioides 7600]	EWG42749.1	74.42	387	96	2	1	386	395	97.7215	1	385	9e-144	513
514	584133377	hypothetical protein FVEG_15488 [Fusarium verticillioides 7600]	EWG42750.1	60.67	178	68	2	1	177	177	100	1	177	9e-52	205
515	584133378	hypothetical protein FVEG_04491 [Fusarium verticillioides 7600]	EWG42751.1	72.86	140	27	1	1	129	157	82.1656	1	140	5e-50	199
518	584133380	hypothetical protein FVEG_04492 [Fusarium verticillioides 7600]	EWG42753.1	79.59	147	30	0	1	147	148	99.3243	1	147	6e-62	238
521	829130353	uncharacterized protein LW94_12798 [Fusarium fujikuroi]	KLP04825.1	64.29	266	92	3	7	271	279	94.9821	33	296	3e-84	315
522	829104827	uncharacterized protein LW93_8266 [Fusarium fujikuroi]	KLO81555.1	84.19	215	31	1	2	213	215	98.6047	61	275	1e-99	365
523	517314885	uncharacterized protein FFUJ_13048 [Fusarium fujikuroi IMI 58289]	CCT66880.1	84.33	217	30	1	1	217	217	100	1	213	6e-100	366
524	587722421	hypothetical protein FOWG_06418 [Fusarium oxysporum f. sp. lycopersici MN25]	EWZ93758.1	67.67	600	143	2	1	551	551	100	1	598	0	756
525	584133384	hypothetical protein FVEG_04496 [Fusarium verticillioides 7600]	EWG42757.1	72.02	747	130	4	4	677	677	99.5569	3	743	0	1085
526	584133385	hypothetical protein FVEG_04497 [Fusarium verticillioides 7600]	EWG42758.1	83.37	427	70	1	1	427	427	100	1	426	0	728
529	829133332	uncharacterized protein Y057_14605 [Fusarium fujikuroi]	KLP07248.1	84.64	690	106	0	1	690	692	99.711	1	690	0	1259
531	584133389	hypothetical protein FVEG_04500 [Fusarium verticillioides 7600]	EWG42762.1	99.66	297	1	0	1	297	297	100	1	297	5e-173	610
532	584133391	hypothetical protein FVEG_04501 [Fusarium verticillioides 7600]	EWG42764.1	99.34	301	2	0	1	301	301	100	1	301	3e-173	611
533	517314894	uncharacterized protein FFUJ_13057 [Fusarium fujikuroi IMI 58289]	CCT66889.1	97.58	289	7	0	1	289	289	100	1	289	5e-149	530
534	829120513	uncharacterized protein LW93_13711 [Fusarium fujikuroi]	KLO96612.1	98.84	601	7	0	1	601	601	100	1	601	0	1207
535	584133403	hypothetical protein FVEG_15492 [Fusarium verticillioides 7600]	EWG42776.1	97.19	855	24	0	1	855	855	100	1	855	0	1588
537	584133400	hypothetical protein FVEG_04509 [Fusarium verticillioides 7600]	EWG42773.1	95.68	672	19	1	1	662	662	100	1	672	0	1298
538	584133398	hypothetical protein FVEG_04507 [Fusarium verticillioides 7600]	EWG42771.1	98.31	767	13	0	1	767	767	100	1	767	0	1569
539	587680279	poly [ADP-ribose] polymerase [Fusarium oxysporum FOSC 3-a]	EWZ02597.1	89.71	748	46	4	1	719	719	100	1	746	0	1220
540	584133395	hypothetical protein FVEG_04505 [Fusarium verticillioides 7600]	EWG42768.1	95.84	505	19	2	1	504	504	100	1	504	0	971
541	584133393	hypothetical protein FVEG_04504 [Fusarium verticillioides 7600]	EWG42766.1	99.43	1755	10	0	1	1755	1755	100	1	1755	0	3610
542	62953152	hypothetical protein [Fusarium fujikuroi]	CAG28683.1	98.73	79	1	0	1	79	79	100	1	79	2e-38	160
543	591418863	hypothetical protein FOCG_07102 [Fusarium oxysporum f. sp. radicis-lycopersici 26381]	EXL54000.1	96.58	146	5	0	1	146	146	100	1	146	2e-68	260
544	584133406	hypothetical protein FVEG_04514 [Fusarium verticillioides 7600]	EWG42779.1	86.43	501	3	2	1	436	436	100	2	502	0	865
546	584133409	hypothetical protein FVEG_15494 [Fusarium verticillioides 7600]	EWG42782.1	87.43	334	42	0	1	334	334	100	1	334	1e-176	622
547	584133410	oxidoreductase [Fusarium verticillioides 7600]	EWG42783.1	98.86	350	4	0	1	350	350	100	1	350	0	704
548	475670723	hypothetical protein FOC4_g10012481 [Fusarium oxysporum f. sp. cubense race 4]	EMT68076.1	98.11	424	8	0	1	424	424	100	1	424	0	855
549	517314911	uncharacterized protein FFUJ_13074 [Fusarium fujikuroi IMI 58289]	CCT67512.1	97.3	74	2	0	1	74	74	100	1	74	5e-36	152
550	517314912	probable ribosomal protein L38 [Fusarium fujikuroi IMI 58289]	CCT66906.1	100	78	0	0	1	78	79	98.7342	1	78	8e-37	155
551	342884774	hypothetical protein FOXB_04545 [Fusarium oxysporum Fo5176]	EGU84964.1	92.34	209	16	0	1	209	209	100	1	209	1e-111	405
552	477516545	hypothetical protein FOC1_g10014616 [Fusarium oxysporum f. sp. cubense race 1]	ENH68826.1	94.96	139	7	0	1	139	139	100	1	139	7e-72	271
553	584133416	mevalonate kinase [Fusarium verticillioides 7600]	EWG42789.1	91.93	508	6	2	1	473	473	100	1	508	0	937
554	302910049	hypothetical protein NECHADRAFT_49141 [Nectria haematococca mpVI 77-13-4]	XP_003050206.1	75.3	506	60	4	1	444	449	98.8864	1	503	0	769
555	584133421	hypothetical protein FVEG_04523 [Fusarium verticillioides 7600]	EWG42794.1	99.41	169	1	0	1	169	169	100	1	169	1e-95	351
556	587722382	hypothetical protein FOWG_06385 [Fusarium oxysporum f. sp. lycopersici MN25]	EWZ93719.1	89.61	664	65	2	1	660	660	100	1	664	0	1251
557	475670735	N-acetyltransferase 9-like protein [Fusarium oxysporum f. sp. cubense race 4]	EMT68088.1	96.46	226	8	0	1	226	226	100	1	226	2e-126	454
558	587722380	acid phosphatase [Fusarium oxysporum f. sp. lycopersici MN25]	EWZ93717.1	96.23	478	18	0	1	478	478	100	1	478	0	956
559	829152491	RBTMx2 protein [Fusarium fujikuroi]	KLP20211.1	91.42	793	20	1	1	745	745	100	1	793	0	1485
560	587680245	hypothetical protein FOYG_01809 [Fusarium oxysporum FOSC 3-a]	EWZ02563.1	98.44	128	2	0	1	128	128	100	1	128	2e-65	250
561	517314923	probable triacylglycerol lipase precursor [Fusarium fujikuroi IMI 58289]	CCT66917.1	85.55	346	8	2	1	304	304	100	1	346	9e-168	592
562	475670740	DNA repair protein rhp7 [Fusarium oxysporum f. sp. cubense race 4]	EMT68093.1	94.14	631	36	1	5	634	634	99.3691	561	1191	0	1180
563	590044137	adenosinetriphosphatase [Fusarium oxysporum f. sp. melonis 26406]	EXK45995.1	90.12	1073	84	1	1	1051	1051	100	1	1073	0	1956
564	584133431	ornithine decarboxylase [Fusarium verticillioides 7600]	EWG42804.1	99.55	446	2	0	1	446	446	100	3	448	0	927
565	591504829	mitochondrial presequence protease [Fusarium oxysporum f. sp. vasinfectum 25433]	EXM34152.1	91.73	1004	12	3	1	933	935	99.7861	1	1004	0	1849
567	342884788	hypothetical protein FOXB_04559 [Fusarium oxysporum Fo5176]	EGU84978.1	99.32	443	3	0	1	443	443	100	1	443	0	905
568	584133434	STE24 endopeptidase [Fusarium verticillioides 7600]	EWG42807.1	99.35	463	3	0	1	463	463	100	1	463	0	935
569	591476038	hypothetical protein FOIG_03766 [Fusarium oxysporum f. sp. cubense tropical race 4 54006]	EXM07210.1	99.24	1050	8	0	1	1050	1050	100	51	1100	0	2159
570	829120550	uncharacterized protein LW93_13748 [Fusarium fujikuroi]	KLO96649.1	90.36	612	20	1	1	573	573	100	1	612	0	1122
571	829120550	uncharacterized protein LW93_13748 [Fusarium fujikuroi]	KLO96649.1	99.21	127	1	0	1	127	136	93.3824	690	816	4e-67	256
572	587680225	hypothetical protein FOYG_01799 [Fusarium oxysporum FOSC 3-a]	EWZ02543.1	90	60	6	0	1	60	62	96.7742	1	60	1e-24	115
575	590044112	phosphatidylinositol phospholipase C, gamma-1 [Fusarium oxysporum f. sp. melonis 26406]	EXK45970.1	91.47	1102	11	3	12	1030	1030	98.932	12	1113	0	2065
576	587702014	hypothetical protein FOZG_04127 [Fusarium oxysporum Fo47]	EWZ48619.1	89.24	223	6	1	1	205	205	100	1	223	9e-110	399
577	475670752	Palmitoyltransferase PFA3 [Fusarium oxysporum f. sp. cubense race 4]	EMT68105.1	99.27	546	4	0	1	546	546	100	1	546	0	1134
578	517314936	uncharacterized protein FFUJ_13099 [Fusarium fujikuroi IMI 58289]	CCT66929.1	92.06	378	25	2	15	387	387	96.3824	1	378	0	726
579	584133450	hypothetical protein FVEG_04542 [Fusarium verticillioides 7600]	EWG42823.1	87.99	608	12	3	1	552	552	100	1	603	0	1073
580	517314938	related to B56-delta regulatory subunit of protein phosphatase 2A [Fusarium fujikuroi IMI 58289]	CCT66930.1	94.69	659	5	1	1	629	629	100	1	659	0	1229
583	477516518	Putative inositol polyphosphate 5-phosphatase C9G1.10c [Fusarium oxysporum f. sp. cubense race 1]	ENH68799.1	96.87	1215	22	2	1	1199	1223	98.0376	1	1215	0	2275
584	517314942	related to PDR16 protein [Fusarium fujikuroi IMI 58289]	CCT66932.1	83.38	349	4	2	1	295	295	100	1	349	9e-162	572
585	517314943	related to human BCS1 protein [Fusarium fujikuroi IMI 58289]	CCT66933.1	98.2	611	11	0	1	611	611	100	1	611	0	1251
586	342884803	hypothetical protein FOXB_04574 [Fusarium oxysporum Fo5176]	EGU84993.1	93.21	221	2	1	1	208	208	100	696	916	7e-112	405
587	587680206	hypothetical protein FOYG_01781 [Fusarium oxysporum FOSC 3-a]	EWZ02524.1	100	103	0	0	1	103	103	100	1	103	1e-54	214
588	517314947	uncharacterized protein FFUJ_13110 [Fusarium fujikuroi IMI 58289]	CCT66937.1	97.92	385	8	0	1	385	385	100	134	518	0	756
589	584133460	hypothetical protein FVEG_04553 [Fusarium verticillioides 7600]	EWG42833.1	87.87	577	70	0	1	577	600	96.1667	1	577	0	1085
590	517314949	uncharacterized protein FFUJ_13112 [Fusarium fujikuroi IMI 58289]	CCT66939.1	70.83	144	42	0	1	144	144	100	1	144	1e-54	214
591	475670766	Cullin-associated NEDD8-dissociated protein 1 [Fusarium oxysporum f. sp. cubense race 4]	EMT68119.1	94.84	1356	32	2	1	1318	1318	100	1	1356	0	2506
592	829114648	uncharacterized protein LW93_8275 [Fusarium fujikuroi]	KLO91034.1	95.31	448	21	0	1	448	448	100	127	574	0	891
593	829114649	uncharacterized protein LW93_8276 [Fusarium fujikuroi]	KLO91035.1	87.5	80	10	0	1	80	81	98.7654	1	80	1e-34	148
594	591450212	hypothetical protein FOPG_04404 [Fusarium oxysporum f. sp. conglutinans race 2 54008]	EXL82564.1	65.84	1338	364	9	1	1301	1301	100	1	1282	0	1713
595	584133466	hypothetical protein FVEG_04557 [Fusarium verticillioides 7600]	EWG42839.1	98.26	516	9	0	1	516	516	100	1	516	0	1052
596	584133467	hypothetical protein FVEG_15501 [Fusarium verticillioides 7600]	EWG42840.1	94.23	364	21	0	1	364	375	97.0667	1	364	0	701
597	342874314	hypothetical protein FOXB_13141 [Fusarium oxysporum Fo5176]	EGU76340.1	99.75	393	1	0	1	393	393	100	1	393	0	802
600	517314960	uncharacterized protein FFUJ_13124 [Fusarium fujikuroi IMI 58289]	CCT66949.1	90.57	159	15	0	1	159	159	100	1	159	7e-81	301
601	587744138	hypothetical protein FOVG_07290 [Fusarium oxysporum f. sp. pisi HDV247]	EXA41854.1	93.38	559	12	1	1	534	534	100	1	559	0	1044
602	584133474	hypothetical protein FVEG_04562 [Fusarium verticillioides 7600]	EWG42847.1	76.15	218	19	2	1	185	185	100	1	218	2e-86	320
603	587701983	hypothetical protein FOZG_04099 [Fusarium oxysporum Fo47]	EWZ48588.1	96.28	269	10	0	1	269	269	100	1	269	2e-148	528
604	587701982	hypothetical protein FOZG_04098 [Fusarium oxysporum Fo47]	EWZ48587.1	92.79	707	19	2	1	675	675	100	1	707	0	1284
606	587744144	hypothetical protein FOVG_07296 [Fusarium oxysporum f. sp. pisi HDV247]	EXA41860.1	96.52	316	11	0	1	316	316	100	1	316	5e-179	630
607	584133490	hypothetical protein FVEG_04568 [Fusarium verticillioides 7600]	EWG42863.1	95.59	272	12	0	1	272	272	100	1	272	3e-139	498
608	477516491	Lactam utilization protein lamB [Fusarium oxysporum f. sp. cubense race 1]	ENH68772.1	92.4	263	4	1	1	247	247	100	1	263	3e-139	497
609	829126515	HOL1, putative substrate-H+ antiporter [Fusarium fujikuroi]	KLP01659.1	98.37	552	9	0	1	552	552	100	1	552	0	1112
610	590044064	hypothetical protein FOMG_04172 [Fusarium oxysporum f. sp. melonis 26406]	EXK45922.1	89.33	1237	54	3	1	1159	1159	100	1	1237	0	2230
611	590044063	hypothetical protein FOMG_04171 [Fusarium oxysporum f. sp. melonis 26406]	EXK45921.1	94.08	828	48	1	1	828	828	100	1	827	0	1611
613	517314974	related to ankyrin repeat-containing YAR1 [Fusarium fujikuroi IMI 58289]	CCT66962.1	99.47	187	1	0	1	187	187	100	1	187	1e-103	378
614	591418771	hypothetical protein FOCG_07030 [Fusarium oxysporum f. sp. radicis-lycopersici 26381]	EXL53908.1	95.17	414	20	0	1	414	414	100	1	414	0	815
615	342873689	hypothetical protein FOXB_13646 [Fusarium oxysporum Fo5176]	EGU75846.1	95.35	795	20	1	1	778	779	99.8716	1	795	0	1583
616	591418768	hypothetical protein FOCG_07027 [Fusarium oxysporum f. sp. radicis-lycopersici 26381]	EXL53905.1	94.67	469	25	0	1	469	469	100	1	469	0	892
617	342873687	hypothetical protein FOXB_13644 [Fusarium oxysporum Fo5176]	EGU75844.1	95.87	508	21	0	1	508	508	100	594	1101	0	1032
618	517314979	related to tRNA-splicing endonuclease beta chain [Fusarium fujikuroi IMI 58289]	CCT66967.1	95.86	604	22	1	1	601	602	99.8339	1	604	0	1180
620	584133503	hypothetical protein FVEG_04578 [Fusarium verticillioides 7600]	EWG42876.1	98.3	176	3	0	1	176	176	100	1	176	3e-100	366
621	829114675	ceramide glucosyltransferase [Fusarium fujikuroi]	KLO91061.1	92.78	526	36	1	1	526	526	100	1	524	0	990
622	829114676	putative guanylate kinase [Fusarium fujikuroi]	KLO91062.1	98.96	193	2	0	1	193	193	100	1	193	1e-108	394
624	829114678	cytochrome P450 7B1 [Fusarium fujikuroi]	KLO91064.1	75.8	529	43	4	1	444	444	100	1	529	0	780
625	590044049	hypothetical protein FOMG_04158 [Fusarium oxysporum f. sp. melonis 26406]	EXK45907.1	98.09	157	3	0	1	157	157	100	1	157	1e-83	311
626	517314986	uncharacterized protein FFUJ_13150 [Fusarium fujikuroi IMI 58289]	CCT66974.1	92.5	693	19	2	1	660	660	100	1	693	0	1326
627	587680157	hypothetical protein FOYG_01739 [Fusarium oxysporum FOSC 3-a]	EWZ02475.1	75.51	196	17	2	1	165	165	100	1	196	9e-73	275
628	475670805	hypothetical protein FOC4_g10012568 [Fusarium oxysporum f. sp. cubense race 4]	EMT68158.1	97.08	411	9	1	1	411	411	100	1	408	0	760
629	475670806	hypothetical protein FOC4_g10012569 [Fusarium oxysporum f. sp. cubense race 4]	EMT68159.1	98.74	477	6	0	1	477	477	100	1	477	0	960
630	587701952	cysteinyl-tRNA synthetase [Fusarium oxysporum Fo47]	EWZ48557.1	98.12	800	9	1	1	794	794	100	40	839	0	1545
631	342888749	hypothetical protein FOXB_01451 [Fusarium oxysporum Fo5176]	EGU87968.1	99	502	5	0	1	502	502	100	1	502	0	1033
632	517314992	uncharacterized protein FFUJ_13156 [Fusarium fujikuroi IMI 58289]	CCT66980.1	96	200	8	0	1	200	200	100	67	266	2e-100	368
633	477516468	Small nuclear ribonucleoprotein Sm D3 [Fusarium oxysporum f. sp. cubense race 1]	ENH68749.1	100	115	0	0	1	115	115	100	154	268	4e-62	239
634	587701948	hypothetical protein FOZG_04067 [Fusarium oxysporum Fo47]	EWZ48553.1	96.54	636	21	1	1	635	635	100	1	636	0	1193
635	829114690	putative DIM1-rRNA (adenine-N6,N6-)-dimethyltransferase [Fusarium fujikuroi]	KLO91076.1	99.12	342	3	0	1	342	342	100	1	342	0	697
636	587680146	hypothetical protein FOYG_01730 [Fusarium oxysporum FOSC 3-a]	EWZ02464.1	95.25	358	17	0	1	358	358	100	1	358	0	705
637	902733793	chitinase [Fusarium oxysporum f. sp. lycopersici 4287]	KNB05362.1	95.5	666	22	1	1	666	666	100	1	658	0	1303
638	591475953	hypothetical protein FOIG_03691 [Fusarium oxysporum f. sp. cubense tropical race 4 54006]	EXM07125.1	93.27	743	48	1	1	741	741	100	1	743	0	1417
639	829114695	uncharacterized protein LW93_8322 [Fusarium fujikuroi]	KLO91081.1	91.75	388	1	1	1	357	357	100	1	388	0	721
640	584133540	hypothetical protein FVEG_04600 [Fusarium verticillioides 7600]	EWG42913.1	97.54	203	5	0	1	203	203	100	1	203	3e-112	407
641	584133537	nucleoside-diphosphate kinase [Fusarium verticillioides 7600]	EWG42910.1	96.22	238	3	1	1	232	232	100	1	238	2e-116	421
642	584133536	alpha 1,3-glucosidase [Fusarium verticillioides 7600]	EWG42909.1	94.08	963	13	1	1	919	919	100	1	963	0	1876
643	584133532	hypothetical protein FVEG_04597 [Fusarium verticillioides 7600]	EWG42905.1	91.98	860	9	2	1	800	800	100	1	860	0	1506
644	829126551	general RNA polymerase II transcription factor TAF12 [Fusarium fujikuroi]	KLP01695.1	91.98	1621	121	4	1	1619	1631	99.2643	1	1614	0	2678
646	584133544	hypothetical protein FVEG_04603 [Fusarium verticillioides 7600]	EWG42917.1	62.12	198	36	3	1	198	198	100	1	159	3e-56	221
647	342888763	hypothetical protein FOXB_01465 [Fusarium oxysporum Fo5176]	EGU87982.1	100	165	0	0	1	165	165	100	1	165	3e-93	342
648	587680133	hypothetical protein FOYG_01717 [Fusarium oxysporum FOSC 3-a]	EWZ02451.1	86.86	898	44	5	1	824	824	100	1	898	0	1389
649	584133547	hypothetical protein FVEG_04606 [Fusarium verticillioides 7600]	EWG42920.1	92.04	540	6	3	1	505	505	100	1	538	0	956
650	591475941	hypothetical protein FOIG_03680 [Fusarium oxysporum f. sp. cubense tropical race 4 54006]	EXM07113.1	98.15	867	16	0	1	867	867	100	2	868	0	1698
651	584133550	hypothetical protein FVEG_04608 [Fusarium verticillioides 7600]	EWG42923.1	98.32	297	5	0	1	297	297	100	1	297	4e-168	593
652	517315011	uncharacterized protein FFUJ_13175 [Fusarium fujikuroi IMI 58289]	CCT66998.1	97.74	177	4	0	1	177	177	100	1	177	2e-98	360
653	829114707	cellobiose dehydrogenase [Fusarium fujikuroi]	KLO91093.1	98.71	544	7	0	1	544	544	100	1	544	0	1105
654	829126559	uncharacterized protein Y057_553 [Fusarium fujikuroi]	KLP01703.1	93.48	537	35	0	1	537	537	100	1	537	0	1031
655	587680122	hypothetical protein FOYG_01708 [Fusarium oxysporum FOSC 3-a]	EWZ02440.1	97.33	150	4	0	1	150	165	90.9091	1	150	1e-81	304
656	342888771	hypothetical protein FOXB_01473 [Fusarium oxysporum Fo5176]	EGU87990.1	97.21	538	1	1	1	524	524	100	1	538	0	1040
657	475670833	PRKR-interacting protein 1 [Fusarium oxysporum f. sp. cubense race 4]	EMT68186.1	82.55	212	17	2	1	192	192	100	1	212	1e-90	335
658	829114712	uncharacterized protein LW93_8340 [Fusarium fujikuroi]	KLO91098.1	99.38	483	3	0	1	483	483	100	1	483	0	1003
659	591504703	hypothetical protein FOTG_02474 [Fusarium oxysporum f. sp. vasinfectum 25433]	EXM34026.1	96.91	2072	49	2	1	2058	2058	100	1	2071	0	4100
661	587680112	hypothetical protein FOYG_01702 [Fusarium oxysporum FOSC 3-a]	EWZ02430.1	88.8	250	9	1	1	231	231	100	82	331	3e-120	434
662	517315020	probable allantoicase [Fusarium fujikuroi IMI 58289]	CCT67007.1	98.61	360	5	0	1	360	360	100	1	360	0	734
663	342888779	hypothetical protein FOXB_01481 [Fusarium oxysporum Fo5176]	EGU87998.1	99.88	814	1	0	1	814	814	100	59	872	0	1686
664	829114717	uncharacterized protein LW93_8345 [Fusarium fujikuroi]	KLO91103.1	92.93	1089	33	4	1	1045	1045	100	1	1089	0	1808
665	591504688	hypothetical protein FOTG_02468 [Fusarium oxysporum f. sp. vasinfectum 25433]	EXM34011.1	91.34	358	20	4	1	348	352	98.8636	1	357	4e-148	528
667	587701888	serine/threonine protein kinase [Fusarium oxysporum Fo47]	EWZ48493.1	95.44	2563	53	3	1	2499	2499	100	1	2563	0	4940
668	587680086	hypothetical protein FOYG_01695 [Fusarium oxysporum FOSC 3-a]	EWZ02404.1	99.61	519	2	0	1	519	519	100	1	519	0	1081
669	517315027	related to triose phosphate/3-phosphoglycerate/phosphate translocator [Fusarium fujikuroi IMI 58289]	CCT67013.1	99.51	405	2	0	1	405	405	100	1	405	0	821
670	558861959	hypothetical protein FGSG_05999 [Fusarium graminearum PH-1]	ESU12042.1	100	135	0	0	1	135	135	100	1	135	2e-73	276
671	587701881	hypothetical protein FOZG_04028 [Fusarium oxysporum Fo47]	EWZ48486.1	98.28	58	1	0	1	58	58	100	1	58	3e-24	113
672	342888786	hypothetical protein FOXB_01488 [Fusarium oxysporum Fo5176]	EGU88005.1	97.36	265	7	0	1	265	265	100	1	265	8e-149	529
673	342888787	hypothetical protein FOXB_01489 [Fusarium oxysporum Fo5176]	EGU88006.1	99.29	424	3	0	1	424	424	100	1	424	0	884
674	517315032	related to transcription factor TFIIH chain p47 [Fusarium fujikuroi IMI 58289]	CCT67017.1	84.62	468	16	3	1	412	412	100	1	468	0	792
675	517315033	related to export control protein CHS7 [Fusarium fujikuroi IMI 58289]	CCT67018.1	99.66	296	1	0	1	296	296	100	1	296	2e-169	598
677	517315034	related to sugar transport protein STP1 [Fusarium fujikuroi IMI 58289]	CCT67019.1	94.16	531	2	1	1	502	502	100	221	751	0	1012
678	584133595	hypothetical protein FVEG_04635 [Fusarium verticillioides 7600]	EWG42968.1	98.45	129	2	0	1	129	129	100	11	139	2e-70	267
679	517315036	related to regulator of mitochondrial iron homeostasis [Fusarium fujikuroi IMI 58289]	CCT67021.1	98.52	203	3	0	1	203	203	100	1	203	2e-114	414
680	342888793	hypothetical protein FOXB_01495 [Fusarium oxysporum Fo5176]	EGU88012.1	100	189	0	0	1	189	189	100	1	189	6e-106	385
681	342888794	hypothetical protein FOXB_01496 [Fusarium oxysporum Fo5176]	EGU88013.1	98.59	142	2	0	1	142	142	100	1	142	1e-75	284
682	517315039	probable leucine--tRNA ligase, cytosolic [Fusarium fujikuroi IMI 58289]	CCT67024.1	94.31	1124	19	2	1	1079	1079	100	1	1124	0	2142
685	477516418	ATP-binding cassette sub-family D member 1 [Fusarium oxysporum f. sp. cubense race 1]	ENH68699.1	99.29	709	5	0	1	709	709	100	1	709	0	1451
686	829114736	RING finger protein Dorfin [Fusarium fujikuroi]	KLO91122.1	73.61	557	104	6	101	646	646	84.5201	1	525	0	695
687	829114737	hsp70 protein [Fusarium fujikuroi]	KLO91123.1	94.35	566	32	0	1	566	568	99.6479	1	566	0	1092
688	591504647	hypothetical protein FOTG_02445 [Fusarium oxysporum f. sp. vasinfectum 25433]	EXM33970.1	98.23	2030	36	0	1	2030	2030	100	1	2030	0	4107
689	517315048	related to NPP1 domain protein [Fusarium fujikuroi IMI 58289]	CCT67033.1	98.3	235	4	0	1	235	235	100	1	235	2e-132	474
690	829114741	uncharacterized protein LW93_8369 [Fusarium fujikuroi]	KLO91127.1	88.45	277	4	1	1	249	249	100	1	277	4e-138	493
691	342888805	hypothetical protein FOXB_01507 [Fusarium oxysporum Fo5176]	EGU88024.1	100	213	0	0	1	213	213	100	1	213	8e-122	439
692	475670867	40S ribosomal protein S25 [Fusarium oxysporum f. sp. cubense race 4]	EMT68220.1	99.02	102	1	0	1	102	122	83.6066	1	102	4e-52	206
693	517315052	probable ADP, ATP carrier protein (ADP/ATP translocase) [Fusarium fujikuroi IMI 58289]	CCT67036.1	100	311	0	0	47	357	357	87.1148	1	311	6e-178	627
695	829126597	uncharacterized protein Y057_591 [Fusarium fujikuroi]	KLP01741.1	86.62	269	15	1	1	248	248	100	1	269	5e-101	370
696	829153602	DNA damage response protein [Fusarium fujikuroi]	KLP20888.1	98.51	268	4	0	1	268	268	100	1	268	1e-154	548
697	475670872	hypothetical protein FOC4_g10012638 [Fusarium oxysporum f. sp. cubense race 4]	EMT68225.1	91.62	656	17	1	1	618	618	100	1	656	0	1192
698	584133626	hypothetical protein FVEG_04656 [Fusarium verticillioides 7600]	EWG42999.1	98.72	468	6	0	1	468	468	100	1	468	0	945
699	475670874	Replication factor C subunit 3 [Fusarium oxysporum f. sp. cubense race 4]	EMT68227.1	99.49	392	2	0	1	392	392	100	1	392	0	801
700	517315059	related to sphingoid base-phosphate phosphatase [Fusarium fujikuroi IMI 58289]	CCT67043.1	99.82	567	1	0	1	567	567	100	1	567	0	1167
701	584133633	hypothetical protein FVEG_04659 [Fusarium verticillioides 7600]	EWG43006.1	97.24	254	7	0	1	254	254	100	1	254	9e-143	509
702	829114753	ubiquitin-activating enzyme UBA2 [Fusarium fujikuroi]	KLO91139.1	96.63	683	23	0	1	683	683	100	3	685	0	1329
703	584133637	hypothetical protein FVEG_04661 [Fusarium verticillioides 7600]	EWG43010.1	98.36	365	6	0	1	365	365	100	1	365	0	749
704	517315063	related to DNA polymerase delta subunit 4 [Fusarium fujikuroi IMI 58289]	CCT67047.1	95	200	10	0	1	200	200	100	1	200	8e-108	392
705	342888815	hypothetical protein FOXB_01517 [Fusarium oxysporum Fo5176]	EGU88034.1	99.06	318	3	0	1	318	318	100	1	318	0	647
706	342888816	hypothetical protein FOXB_01518 [Fusarium oxysporum Fo5176]	EGU88035.1	100	338	0	0	1	338	338	100	1	338	0	707
707	517315066	probable beta (1-3) glucanosyltransferase [Fusarium fujikuroi IMI 58289]	CCT67518.1	95.92	490	5	1	1	475	475	100	1	490	0	961
708	517315067	probable ATP citrate lyase subunit 2 [Fusarium fujikuroi IMI 58289]	CCT67050.1	100	489	0	0	1	489	489	100	1	489	0	999
709	477516393	Putative ATP-citrate synthase subunit 1 [Fusarium oxysporum f. sp. cubense race 1]	ENH68674.1	97.71	655	2	1	1	642	642	100	1	655	0	1306
710	517315069	probable ribosomal protein L30 [Fusarium fujikuroi IMI 58289]	CCT67052.1	100	83	0	0	1	83	100	83	1	83	2e-40	167
711	475670889	Chromatin modification-related protein eaf3 [Fusarium oxysporum f. sp. cubense race 4]	EMT68242.1	95.89	438	15	2	13	448	448	97.3214	13	449	0	845
712	587680020	hypothetical protein FOYG_01650 [Fusarium oxysporum FOSC 3-a]	EWZ02338.1	99.46	185	1	0	1	185	185	100	1	185	2e-101	370
713	475670892	hypothetical protein FOC4_g10012658 [Fusarium oxysporum f. sp. cubense race 4]	EMT68245.1	99.17	240	2	0	1	240	240	100	1	240	4e-140	500
714	829114765	general RNA polymerase II transcription factor TAF12 [Fusarium fujikuroi]	KLO91151.1	93.32	689	44	2	1	688	688	100	1	688	0	1043
715	475670894	Putative 26S proteasome regulatory subunit rpn3 [Fusarium oxysporum f. sp. cubense race 4]	EMT68247.1	99.48	576	3	0	1	576	576	100	1	576	0	1174
716	342880537	hypothetical protein FOXB_07861 [Fusarium oxysporum Fo5176]	EGU81625.1	85.94	683	25	2	1	612	612	100	1	683	0	1177
717	584133662	hypothetical protein FVEG_04679 [Fusarium verticillioides 7600]	EWG43035.1	94.33	653	35	1	1	651	651	100	1	653	0	1188
718	342880535	hypothetical protein FOXB_07859 [Fusarium oxysporum Fo5176]	EGU81623.1	100	146	0	0	1	146	146	100	1	146	1e-74	281
719	591504595	hypothetical protein FOTG_02410 [Fusarium oxysporum f. sp. vasinfectum 25433]	EXM33918.1	93.09	810	22	2	1	776	776	100	1	810	0	1479
720	475670899	Alpha,alpha-trehalose-phosphate synthase [UDP-forming] [Fusarium oxysporum f. sp. cubense race 4]	EMT68252.1	100	530	0	0	1	530	530	100	93	622	0	1103
721	587701797	hypothetical protein FOZG_03973 [Fusarium oxysporum Fo47]	EWZ48402.1	96.29	809	3	2	1	782	782	100	1	809	0	1505
722	751353836	hypothetical protein FAVG1_05175 [Fusarium avenaceum]	KIL91558.1	77.37	1520	275	18	1	1472	1472	100	1	1499	0	2248
723	475670903	hypothetical protein FOC4_h10017255, partial [Fusarium oxysporum f. sp. cubense race 4]	EMT68256.1	76.92	65	14	1	1	64	76	84.2105	30	94	7e-19	95.9
724	829114775	putative phosphoglyceromutase [Fusarium fujikuroi]	KLO91161.1	99.05	525	5	0	1	525	525	100	1	525	0	1077
725	584133680	hypothetical protein FVEG_04688 [Fusarium verticillioides 7600]	EWG43053.1	98.52	135	2	0	14	148	148	91.2162	14	148	2e-70	267
726	587744341	hypothetical protein FOVG_07425 [Fusarium oxysporum f. sp. pisi HDV247]	EXA42057.1	96.97	363	11	0	1	363	363	100	28	390	0	729
727	829114779	N-acetylglucosaminyl-phosphatidylinositol biosynthetic protein gpi1 [Fusarium fujikuroi]	KLO91165.1	96.46	762	12	2	1	747	747	100	1	762	0	1486
728	584133687	hypothetical protein FVEG_04691 [Fusarium verticillioides 7600]	EWG43060.1	97.56	82	2	0	1	82	82	100	1	82	5e-41	169
729	587679975	hypothetical protein FOYG_01629 [Fusarium oxysporum FOSC 3-a]	EWZ02293.1	89.73	438	36	3	1	437	437	100	1	430	2e-180	635
730	477516371	Bifunctional protein GAL10 [Fusarium oxysporum f. sp. cubense race 1]	ENH68652.1	98.82	340	4	0	1	340	340	100	1	340	0	689
731	829114783	ferric reductase FRE2 precursor [Fusarium fujikuroi]	KLO91169.1	93.86	651	5	1	1	616	616	100	1	651	0	1242
732	517315092	related to copper transport protein [Fusarium fujikuroi IMI 58289]	CCT67072.1	97.25	182	5	0	1	182	182	100	1	182	3e-101	370
733	584133692	hypothetical protein FVEG_04696 [Fusarium verticillioides 7600]	EWG43065.1	96.64	149	5	0	25	173	173	86.1272	25	173	6e-81	302
734	590043846	hypothetical protein FOMG_04038 [Fusarium oxysporum f. sp. melonis 26406]	EXK45704.1	94.12	306	18	0	1	306	306	100	1	306	9e-159	562
735	584133694	hypothetical protein FVEG_04698 [Fusarium verticillioides 7600]	EWG43067.1	92.22	90	7	0	1	90	91	98.9011	1	90	1e-43	178
736	829114788	putative DNA polymerase epsilon, calytic chain POL2 [Fusarium fujikuroi]	KLO91174.1	97.92	2211	18	1	1	2183	2183	100	1	2211	0	4440
737	584133698	DNA polymerase epsilon subunit 1 [Fusarium verticillioides 7600]	EWG43071.1	94.1	847	35	1	1	832	836	99.5215	1	847	0	1633
739	475670926	Isotrichodermin C-15 hydroxylase [Fusarium oxysporum f. sp. cubense race 4]	EMT68279.1	99.25	531	4	0	1	531	531	100	1	531	0	1103
740	517315101	related to CWH43-putative sensor/transporter protein [Fusarium fujikuroi IMI 58289]	CCT67080.1	98.54	960	14	0	1	960	960	100	1	960	0	1949
741	829126305	UTP6-U3 snoRNP protein [Fusarium fujikuroi]	KLP01491.1	96.21	396	13	1	1	394	394	100	1	396	0	778
742	584133708	hypothetical protein FVEG_04708 [Fusarium verticillioides 7600]	EWG43081.1	97.28	1066	27	2	1	1064	1064	100	1	1066	0	1969
743	584133714	hypothetical protein FVEG_04709 [Fusarium verticillioides 7600]	EWG43087.1	95.93	172	7	0	1	172	172	100	1	172	1e-93	344
744	584133715	eukaryotic translation initiation factor 3 subunit E [Fusarium verticillioides 7600]	EWG43088.1	93.83	405	2	1	3	384	384	99.4792	35	439	0	788
745	517315106	probable APC1-subunit of anaphase-promoting complex (cyclosome) [Fusarium fujikuroi IMI 58289]	CCT67085.1	97.43	1943	50	0	1	1943	1943	100	1	1943	0	3779
746	587722084	hypothetical protein FOWG_06181 [Fusarium oxysporum f. sp. lycopersici MN25]	EWZ93421.1	96.2	1026	39	0	1	1026	1188	86.3636	1	1026	0	1920
747	517315108	uncharacterized protein FFUJ_13270 [Fusarium fujikuroi IMI 58289]	CCT67087.1	82.64	265	27	2	1	246	246	100	1	265	2e-109	398
748	829114801	uncharacterized protein LW93_8431 [Fusarium fujikuroi]	KLO91187.1	92.28	479	37	0	1	479	479	100	1	479	0	915
749	590069555	aspartyl-tRNA(Asn)/glutamyl-tRNA (Gln) amidotransferase subunit B [Fusarium oxysporum f. sp. raphani 54005]	EXK97079.1	97.41	617	16	0	1	617	617	100	1	617	0	1211
750	584133723	hypothetical protein FVEG_15530 [Fusarium verticillioides 7600]	EWG43096.1	92.72	316	23	0	1	316	316	100	1	316	5e-150	534
751	342885571	hypothetical protein FOXB_03923 [Fusarium oxysporum Fo5176]	EGU85562.1	90.51	390	26	1	1	379	379	100	1	390	0	739
752	342885572	hypothetical protein FOXB_03924 [Fusarium oxysporum Fo5176]	EGU85563.1	99.26	272	2	0	1	272	272	100	1	272	1e-156	555
753	584133726	hypothetical protein FVEG_04718 [Fusarium verticillioides 7600]	EWG43099.1	100	126	0	0	1	126	126	100	1	126	5e-63	242
754	584133736	hypothetical protein FVEG_04719 [Fusarium verticillioides 7600]	EWG43109.1	96.31	651	22	1	1	651	651	100	1	649	0	1284
755	584133728	methylglutaconyl-CoA hydratase [Fusarium verticillioides 7600]	EWG43101.1	98.06	309	6	0	3	311	311	99.3569	10	318	5e-171	603
756	342871885	hypothetical protein FOXB_15169 [Fusarium oxysporum Fo5176]	EGU74318.1	85.7	1315	130	5	1	1281	1282	99.922	1	1291	0	2236
757	590043806	hypothetical protein FOMG_04007 [Fusarium oxysporum f. sp. melonis 26406]	EXK45664.1	94.41	1253	37	1	1	1220	1220	100	1	1253	0	2422
758	590043805	hypothetical protein FOMG_04006 [Fusarium oxysporum f. sp. melonis 26406]	EXK45663.1	77.37	411	39	5	1	364	364	100	1	404	4e-138	494
759	584133742	hypothetical protein FVEG_04723 [Fusarium verticillioides 7600]	EWG43115.1	88.02	167	6	1	1	153	156	98.0769	75	241	8e-82	305
760	584133745	transformation/transcription domain-associated protein [Fusarium verticillioides 7600]	EWG43118.1	96.37	3859	36	4	1	3770	4461	84.5102	1	3844	0	7595
761	584133748	hypothetical protein FVEG_15532 [Fusarium verticillioides 7600]	EWG43121.1	98.22	169	3	0	1	169	169	100	1	169	2e-90	333
762	517315126	related to anaphase control protein cut9 [Fusarium fujikuroi IMI 58289]	CCT67103.1	97.24	616	5	1	1	604	604	100	1	616	0	1240
763	342885472	hypothetical protein FOXB_03954 [Fusarium oxysporum Fo5176]	EGU85470.1	100	227	0	0	1	227	227	100	1	227	7e-130	466
764	517315128	probable glutamate N-acetyltransferase precursor [Fusarium fujikuroi IMI 58289]	CCT67105.1	99.56	452	2	0	1	452	452	100	1	452	0	922
765	584133752	translation initiation factor eIF-2B subunit delta [Fusarium verticillioides 7600]	EWG43125.1	84.55	453	25	2	1	408	408	100	1	453	0	739
766	342885475	hypothetical protein FOXB_03957 [Fusarium oxysporum Fo5176]	EGU85473.1	100	84	0	0	1	84	84	100	1	84	3e-42	173
767	517315131	related to NUO-14 NADH2 dehydrogenase (ubiquinone) 14K chain [Fusarium fujikuroi IMI 58289]	CCT67108.1	98.69	1753	23	0	1	1753	1753	100	1	1753	0	3585
768	477516330	Argininosuccinate synthase [Fusarium oxysporum f. sp. cubense race 1]	ENH68611.1	97.7	435	10	0	1	435	435	100	1	435	0	881
769	829114824	uncharacterized protein LW93_8454 [Fusarium fujikuroi]	KLO91210.1	74.13	259	56	2	1	259	259	100	1	248	3e-86	321
770	584133758	hypothetical protein FVEG_04734 [Fusarium verticillioides 7600]	EWG43131.1	97.5	320	8	0	1	320	320	100	1	320	1e-179	632
771	587679904	3-oxoacyl-[acyl-carrier protein] reductase [Fusarium oxysporum FOSC 3-a]	EWZ02222.1	91.73	254	21	0	1	254	256	99.2188	1	254	5e-137	489
772	584133762	hypothetical protein FVEG_04735 [Fusarium verticillioides 7600]	EWG43135.1	92.32	1211	39	3	1	1157	1157	100	1	1211	0	2149
773	584133763	hypothetical protein FVEG_15534 [Fusarium verticillioides 7600]	EWG43136.1	97.99	149	3	0	1	149	149	100	1	149	2e-78	293
774	517315137	related to trimethyllysine hydroxylase [Fusarium fujikuroi IMI 58289]	CCT67113.1	95.44	439	19	1	1	438	438	100	51	489	0	889
775	342885483	hypothetical protein FOXB_03965 [Fusarium oxysporum Fo5176]	EGU85481.1	92.76	290	2	1	1	271	271	100	1	290	4e-154	547
776	342885482	hypothetical protein FOXB_03964 [Fusarium oxysporum Fo5176]	EGU85480.1	99.82	566	1	0	1	566	566	100	1	566	0	1187
778	584133772	hypothetical protein FVEG_04740 [Fusarium verticillioides 7600]	EWG43145.1	95.8	381	4	1	1	369	369	100	1	381	0	732
779	584133773	hypothetical protein FVEG_04741 [Fusarium verticillioides 7600]	EWG43146.1	92.5	707	26	1	1	680	680	100	1	707	0	1349
780	517315143	uncharacterized protein FFUJ_13304 [Fusarium fujikuroi IMI 58289]	CCT67118.1	85.42	384	18	1	1	346	346	100	1	384	0	637
781	587744438	hypothetical protein FOVG_07484 [Fusarium oxysporum f. sp. pisi HDV247]	EXA42154.1	95.29	276	13	0	1	276	276	100	1	276	9e-156	552
782	517315145	related to chromosome segregation protein Cse1p [Fusarium fujikuroi IMI 58289]	CCT67120.1	99.39	489	3	0	1	489	489	100	1	489	0	997
783	342885491	hypothetical protein FOXB_03973 [Fusarium oxysporum Fo5176]	EGU85489.1	83.6	189	3	1	1	161	161	100	1	189	4e-84	313
784	517315147	related to RRP15 Essential protein involved in pre-rRNA processing [Fusarium fujikuroi IMI 58289]	CCT67122.1	95.45	286	12	1	1	286	301	95.0166	1	285	1e-138	496
785	829114839	alkaline phosphatase family protein [Fusarium fujikuroi]	KLO91225.1	97.61	627	15	0	1	627	627	100	1	627	0	1266
786	584133780	3-isopropylmalate dehydrogenase [Fusarium verticillioides 7600]	EWG43153.1	87.89	388	11	2	1	375	375	100	1	365	0	663
787	517315150	related to ERP2-p24 protein involved in membrane trafficking [Fusarium fujikuroi IMI 58289]	CCT67124.1	100	210	0	0	1	210	210	100	1	210	6e-119	429
788	584133782	SNW protein 1 [Fusarium verticillioides 7600]	EWG43155.1	99.15	585	5	0	1	585	585	100	1	585	0	1174
789	591475688	hypothetical protein FOIG_03527 [Fusarium oxysporum f. sp. cubense tropical race 4 54006]	EXM06860.1	98.96	670	7	0	1	670	670	100	1	670	0	1380
790	587701667	hypothetical protein FOZG_03892 [Fusarium oxysporum Fo47]	EWZ48272.1	96.47	170	6	0	1	170	170	100	49	218	4e-90	332
791	829126255	endo-1,3(4)-beta-glucanase [Fusarium fujikuroi]	KLP01441.1	89.68	378	21	1	1	360	360	100	1	378	0	675
792	584133786	hypothetical protein FVEG_04754 [Fusarium verticillioides 7600]	EWG43159.1	99.44	177	1	0	1	177	177	100	1	177	8e-97	355
793	829121653	uncharacterized protein LW94_13883 [Fusarium fujikuroi]	KLO97675.1	88.37	361	32	2	1	351	351	100	1	361	2e-173	611
794	475670984	Phosphatidylglycerophosphatase GEP4, mitochondrial [Fusarium oxysporum f. sp. cubense race 4]	EMT68337.1	97.22	216	6	0	1	216	216	100	1	216	8e-122	439
795	587701658	origin recognition complex subunit 2 [Fusarium oxysporum Fo47]	EWZ48263.1	97.92	577	12	0	1	577	577	100	1	577	0	1139
796	587679861	hypothetical protein FOYG_01555 [Fusarium oxysporum FOSC 3-a]	EWZ02179.1	97.53	889	22	0	1	889	889	100	1	889	0	1704
797	517315160	uncharacterized protein FFUJ_13321 [Fusarium fujikuroi IMI 58289]	CCT67134.1	96.39	527	19	0	1	527	527	100	1	527	0	812
798	902734053	hypothetical protein FOXG_07839 [Fusarium oxysporum f. sp. lycopersici 4287]	KNB05622.1	92.14	140	8	1	1	140	140	100	56	192	3e-50	200
799	587701620	hypothetical protein FOZG_03883 [Fusarium oxysporum Fo47]	EWZ48225.1	98.85	610	7	0	1	610	610	100	1	610	0	1221
800	342885507	hypothetical protein FOXB_03989 [Fusarium oxysporum Fo5176]	EGU85505.1	96.71	365	2	1	1	355	355	100	1	365	0	723
801	584133806	hypothetical protein FVEG_04762 [Fusarium verticillioides 7600]	EWG43179.1	83.97	948	54	7	1	850	850	100	1	948	0	1509
802	584133807	hypothetical protein FVEG_04763 [Fusarium verticillioides 7600]	EWG43180.1	93.55	496	29	1	1	496	496	100	1	493	0	969
803	829114856	uncharacterized protein LW93_8486 [Fusarium fujikuroi]	KLO91242.1	85.4	226	28	1	1	226	226	100	1	221	3e-101	370
804	342885511	hypothetical protein FOXB_03993 [Fusarium oxysporum Fo5176]	EGU85509.1	98.73	237	3	0	1	237	237	100	1	237	1e-136	489
805	584133813	hypothetical protein FVEG_04766 [Fusarium verticillioides 7600]	EWG43186.1	67.61	176	27	2	1	148	163	90.7975	85	258	2e-61	237
807	590069665	hypothetical protein FOQG_02468 [Fusarium oxysporum f. sp. raphani 54005]	EXK97189.1	82.42	91	16	0	1	91	91	100	1	91	5e-22	106
808	584133818	hypothetical protein FVEG_04768 [Fusarium verticillioides 7600]	EWG43191.1	87.65	170	21	0	1	170	170	100	1	170	2e-81	303
809	829114860	uncharacterized protein LW93_8490 [Fusarium fujikuroi]	KLO91246.1	89.74	497	51	0	1	497	498	99.7992	1	497	0	904
810	584133820	hypothetical protein FVEG_04770 [Fusarium verticillioides 7600]	EWG43193.1	98.21	558	10	0	1	558	558	100	1	558	0	1140
811	829114858	uncharacterized protein LW93_8488 [Fusarium fujikuroi]	KLO91244.1	79.34	271	55	1	1	270	270	100	1	271	2e-122	442
814	829114863	SYG1 protein [Fusarium fujikuroi]	KLO91249.1	97.25	981	27	0	1	981	982	99.8982	1	981	0	1984
815	342885519	hypothetical protein FOXB_04001 [Fusarium oxysporum Fo5176]	EGU85517.1	100	347	0	0	1	347	347	100	1	347	0	696
816	591475649	hypothetical protein FOIG_03497 [Fusarium oxysporum f. sp. cubense tropical race 4 54006]	EXM06821.1	94.69	622	33	0	1	622	622	100	1	622	0	1078
817	477516282	hypothetical protein FOC1_g10014348 [Fusarium oxysporum f. sp. cubense race 1]	ENH68563.1	85.23	894	73	4	1	835	901	92.6748	1	894	0	1378
818	587744501	hypothetical protein FOVG_07520 [Fusarium oxysporum f. sp. pisi HDV247]	EXA42217.1	84.71	85	13	0	1	85	85	100	1	85	5e-36	152
819	591418395	hypothetical protein FOCG_06805 [Fusarium oxysporum f. sp. radicis-lycopersici 26381]	EXL53532.1	96.25	1467	55	0	1	1467	1467	100	59	1525	0	2867
820	517315179	uncharacterized protein FFUJ_13340 [Fusarium fujikuroi IMI 58289]	CCT67152.1	97.96	538	11	0	1	538	538	100	1	538	0	1050
821	342885526	hypothetical protein FOXB_04008 [Fusarium oxysporum Fo5176]	EGU85524.1	96.63	297	2	2	1	289	289	100	1	297	6e-164	580
822	829126228	uncharacterized protein Y057_9386 [Fusarium fujikuroi]	KLP01414.1	82.33	317	56	0	2	318	319	99.373	57	373	1e-153	545
823	342885528	hypothetical protein FOXB_04010 [Fusarium oxysporum Fo5176]	EGU85526.1	99.07	431	4	0	1	431	431	100	5	435	0	868
824	584133835	hypothetical protein FVEG_04784 [Fusarium verticillioides 7600]	EWG43208.1	95.1	510	20	2	1	508	508	100	1	507	0	996
825	475671016	Cell division cycle protein cdt2 [Fusarium oxysporum f. sp. cubense race 4]	EMT68369.1	96.01	702	26	1	1	702	702	100	1	700	0	1385
826	584133837	glutamine amidotransferase [Fusarium verticillioides 7600]	EWG43210.1	94.15	479	9	1	1	460	460	100	1	479	0	936
827	584133838	hypothetical protein FVEG_04787 [Fusarium verticillioides 7600]	EWG43211.1	84.17	278	44	0	1	278	278	100	1	278	4e-132	474
828	584133839	hypothetical protein FVEG_04788 [Fusarium verticillioides 7600]	EWG43212.1	88.42	855	38	7	1	794	794	100	5	859	0	1528
830	587701567	hypothetical protein FOZG_03847 [Fusarium oxysporum Fo47]	EWZ48172.1	96.74	582	19	0	1	582	582	100	1	582	0	1171
831	584133847	glutathione peroxidase [Fusarium verticillioides 7600]	EWG43220.1	98.83	171	2	0	1	171	171	100	108	278	1e-96	354
832	587701565	hypothetical protein FOZG_03845 [Fusarium oxysporum Fo47]	EWZ48170.1	98.36	428	7	0	1	428	428	100	32	459	0	881
833	517315191	related to NOP16 constituent of 66S pre-ribosomal particles [Fusarium fujikuroi IMI 58289]	CCT67163.1	98.6	215	3	0	1	215	215	100	1	215	5e-119	429
834	584133850	hypothetical protein FVEG_04793 [Fusarium verticillioides 7600]	EWG43223.1	99.29	281	2	0	1	281	281	100	1	281	2e-163	578
835	477516265	hypothetical protein FOC1_g10014331 [Fusarium oxysporum f. sp. cubense race 1]	ENH68546.1	96.07	280	11	0	1	280	280	100	1	280	1e-149	532
836	584133852	hypothetical protein FVEG_04795 [Fusarium verticillioides 7600]	EWG43225.1	96.67	571	7	1	1	559	559	100	1	571	0	1079
837	517315198	related to dihydrodipicolinate synthase [Fusarium fujikuroi IMI 58289]	CCT67168.1	95.45	330	3	1	1	318	318	100	1	330	6e-173	610
838	475671028	Putative oxidoreductase ydgJ [Fusarium oxysporum f. sp. cubense race 4]	EMT68381.1	99.52	416	2	0	1	416	416	100	1	416	0	862
839	477516261	tRNA A64-2'-O-ribosylphosphate transferase [Fusarium oxysporum f. sp. cubense race 1]	ENH68542.1	95.81	453	19	0	1	453	453	100	1	453	0	899
840	517315201	probable HAD superfamily hydrolase [Fusarium fujikuroi IMI 58289]	CCT67526.1	98.37	245	4	0	1	245	245	100	1	245	1e-137	492
841	342879319	hypothetical protein FOXB_08903 [Fusarium oxysporum Fo5176]	EGU80572.1	90.49	368	14	2	1	347	347	100	1	368	0	637
842	829114890	uncharacterized protein LW93_8520 [Fusarium fujikuroi]	KLO91276.1	91.78	888	51	3	1	868	868	100	1	886	0	1642
843	584133872	ubiquitin-conjugating enzyme E2 R [Fusarium verticillioides 7600]	EWG43245.1	99.11	224	2	0	1	224	224	100	1	224	3e-127	457
844	829114892	putative cpc-3 protein [Fusarium fujikuroi]	KLO91278.1	94.47	1609	49	5	1	1569	1569	100	1	1609	0	3078
845	587679776	hypothetical protein FOYG_01500 [Fusarium oxysporum FOSC 3-a]	EWZ02094.1	93.12	683	34	2	1	672	672	100	1	681	0	1253
846	584133879	urease accessory protein [Fusarium verticillioides 7600]	EWG43252.1	94.01	284	17	0	1	284	284	100	1	284	1e-145	519
847	475671038	Pre-mRNA-splicing factor CWC2 [Fusarium oxysporum f. sp. cubense race 4]	EMT68391.1	97.52	404	9	1	1	403	403	100	1	404	0	764
848	475671039	Ribosome-interacting GTPase 2 [Fusarium oxysporum f. sp. cubense race 4]	EMT68392.1	94.39	374	1	2	1	354	354	100	1	374	0	675
849	342879326	hypothetical protein FOXB_08910 [Fusarium oxysporum Fo5176]	EGU80579.1	100	106	0	0	1	106	106	100	1	106	1e-54	214
850	517315211	related to acyl-CoA dehydrogenase, medium-chain specific, mitochondrial precursor [Fusarium fujikuroi IMI 58289]	CCT67179.1	98.45	452	7	0	1	452	452	100	1	452	0	921
851	302911601	predicted protein [Nectria haematococca mpVI 77-13-4]	XP_003050527.1	100	205	0	0	1	205	205	100	1	205	1e-117	424
852	342879329	hypothetical protein FOXB_08913 [Fusarium oxysporum Fo5176]	EGU80582.1	97.81	366	8	0	1	366	366	100	1	366	0	711
853	517315214	probable guanosine-diphosphatase [Fusarium fujikuroi IMI 58289]	CCT67182.1	92.48	545	4	1	1	508	508	100	1	545	0	1036
854	590069739	hypothetical protein FOQG_02520 [Fusarium oxysporum f. sp. raphani 54005]	EXK97263.1	96.86	574	18	0	1	574	574	100	1	574	0	1156
855	517315216	uncharacterized protein FFUJ_13377 [Fusarium fujikuroi IMI 58289]	CCT67184.1	77.26	409	74	4	1	391	393	99.4911	642	1049	2e-176	622
856	342879333	hypothetical protein FOXB_08917 [Fusarium oxysporum Fo5176]	EGU80586.1	97.12	104	3	0	1	104	104	100	1	104	1e-51	204
857	517315218	related to putative GTPases (G3E family) [Fusarium fujikuroi IMI 58289]	CCT67186.1	80.32	371	6	2	1	304	304	100	1	371	4e-164	580
858	475671051	hypothetical protein FOC4_g10012820 [Fusarium oxysporum f. sp. cubense race 4]	EMT68404.1	91.28	539	28	3	1	525	525	100	1	534	0	986
859	590069745	hypothetical protein FOQG_02525 [Fusarium oxysporum f. sp. raphani 54005]	EXK97269.1	92.2	1346	53	2	1	1301	1301	100	1	1339	0	2488
860	517315221	probable AVT3-involved in amino acid efflux from the vacuole [Fusarium fujikuroi IMI 58289]	CCT67189.1	98.43	766	5	1	1	759	759	100	1	766	0	1494
861	475671054	Altered inheritance of mitochondria protein 32 [Fusarium oxysporum f. sp. cubense race 4]	EMT68407.1	97.75	356	5	1	1	353	353	100	1	356	0	708
862	475671055	Putative FAD-binding protein C17H9.12c [Fusarium oxysporum f. sp. cubense race 4]	EMT68408.1	94.71	359	19	0	68	426	434	82.7189	53	411	0	705
863	584133900	phospholipid-translocating ATPase [Fusarium verticillioides 7600]	EWG43273.1	95.63	1303	20	2	1	1266	1266	100	1	1303	0	2483
864	584133901	RuvB-like helicase 1 [Fusarium verticillioides 7600]	EWG43274.1	93.89	458	2	1	1	432	432	100	1	458	0	859
865	517315225	uncharacterized protein FFUJ_13386 [Fusarium fujikuroi IMI 58289]	CCT67192.1	93.75	672	23	1	1	653	653	100	1	672	0	1248
866	584133904	dynactin 1 [Fusarium verticillioides 7600]	EWG43277.1	98.35	1332	22	0	1	1332	1332	100	1	1332	0	2682
867	342884059	hypothetical protein FOXB_05067 [Fusarium oxysporum Fo5176]	EGU84402.1	99.27	275	2	0	58	332	332	82.8313	1	275	8e-156	553
868	584133906	hypothetical protein FVEG_04826 [Fusarium verticillioides 7600]	EWG43279.1	94.57	442	24	0	1	442	463	95.4644	1	442	0	880
869	342884061	hypothetical protein FOXB_05069 [Fusarium oxysporum Fo5176]	EGU84404.1	94.63	1062	30	2	1	1036	1036	100	1	1061	0	2031
870	517315231	related to CDP diacylglycerol-inositol 3-phosphatidyltransferase [Fusarium fujikuroi IMI 58289]	CCT67198.1	96.44	309	3	1	1	301	301	100	1	309	1e-172	608
871	517315232	uncharacterized protein FFUJ_13393 [Fusarium fujikuroi IMI 58289]	CCT67199.1	95.31	320	11	1	1	320	320	100	12	327	3e-171	604
872	584133913	hypothetical protein FVEG_04831 [Fusarium verticillioides 7600]	EWG43286.1	93.01	672	16	2	1	641	647	99.0726	2	673	0	1243
873	477516227	RNA-binding protein rsd1 [Fusarium oxysporum f. sp. cubense race 1]	ENH68508.1	99.47	566	3	0	1	566	566	100	1	566	0	1140
874	584133915	cytochrome P450 oxidoreductase [Fusarium verticillioides 7600]	EWG43288.1	99.22	383	3	0	1	383	383	100	1	383	0	790
875	517315236	probable heterokaryon incompatibility Het-C protein [Fusarium fujikuroi IMI 58289]	CCT67203.1	98.33	778	13	0	1	778	778	100	1	778	0	1581
876	587744599	hypothetical protein FOVG_07586 [Fusarium oxysporum f. sp. pisi HDV247]	EXA42315.1	92.75	662	18	2	1	632	632	100	1	662	0	1233
877	475671072	hypothetical protein FOC4_g10012841 [Fusarium oxysporum f. sp. cubense race 4]	EMT68425.1	97.89	474	10	0	1	474	474	100	1	474	0	964
878	584133923	high-affinity iron transporter [Fusarium verticillioides 7600]	EWG43296.1	98.59	355	5	0	1	355	355	100	1	355	0	717
879	390516495	ferroxidase [Fusarium fujikuroi]	CCE73641.1	99.04	623	6	0	1	623	623	100	1	623	0	1281
880	517315241	probable CAP20-virulence factor [Fusarium fujikuroi IMI 58289]	CCT67208.1	98.9	182	2	0	1	182	182	100	1	182	4e-101	369
881	584133929	hypothetical protein FVEG_04840 [Fusarium verticillioides 7600]	EWG43302.1	95.83	240	10	0	1	240	240	100	1	240	2e-133	478
882	517315243	uncharacterized protein FFUJ_13404 [Fusarium fujikuroi IMI 58289]	CCT67210.1	77.74	548	98	2	19	542	542	96.679	27	574	0	863
883	584133933	pirin (iron-binding nuclear protein) [Fusarium verticillioides 7600]	EWG43306.1	98.08	364	6	1	1	364	364	100	1	363	0	739
884	587679713	hypothetical protein FOYG_01456 [Fusarium oxysporum FOSC 3-a]	EWZ02031.1	89.81	314	9	1	1	291	291	100	1	314	4e-138	494
885	517315246	probable ribonucleoside-diphosphate reductase large chain (un-24) [Fusarium fujikuroi IMI 58289]	CCT67213.1	94.09	897	5	2	1	849	849	100	1	897	0	1747
886	587679708	TatD DNase [Fusarium oxysporum FOSC 3-a]	EWZ02026.1	90.61	394	10	1	1	367	367	100	33	426	0	699
887	584133938	hypothetical protein FVEG_15554 [Fusarium verticillioides 7600]	EWG43311.1	96.24	505	19	0	1	505	505	100	1	505	0	967
888	517315249	related to regulatory protein cys-3 [Fusarium fujikuroi IMI 58289]	CCT67216.1	96.12	103	4	0	1	103	126	81.746	1	103	3e-53	209
889	517315249	related to regulatory protein cys-3 [Fusarium fujikuroi IMI 58289]	CCT67216.1	98.38	185	3	0	1	185	185	100	97	281	4e-102	373
890	342878953	hypothetical protein FOXB_09270 [Fusarium oxysporum Fo5176]	EGU80231.1	94.93	138	7	0	1	138	138	100	1	138	3e-71	270
891	517315251	related to aspartate aminotransferase [Fusarium fujikuroi IMI 58289]	CCT67529.1	99.79	467	1	0	1	467	467	100	1	467	0	971
893	584133946	hypothetical protein FVEG_04850 [Fusarium verticillioides 7600]	EWG43319.1	88.32	351	41	0	44	394	396	88.6364	1	351	0	649
895	829114942	uncharacterized protein LW93_8572 [Fusarium fujikuroi]	KLO91328.1	68.6	207	37	2	2	208	208	99.5192	192	370	4e-72	273
896	342878947	hypothetical protein FOXB_09264 [Fusarium oxysporum Fo5176]	EGU80225.1	85.29	238	35	0	1	238	238	100	30	267	1e-114	415
897	342872673	hypothetical protein FOXB_14493, partial [Fusarium oxysporum Fo5176]	EGU74997.1	91.08	269	24	0	8	276	278	96.7626	1	269	5e-142	506
898	342878945	hypothetical protein FOXB_09262 [Fusarium oxysporum Fo5176]	EGU80223.1	96.44	899	3	1	1	870	870	100	1	899	0	1757
899	584133949	hypothetical protein FVEG_04853 [Fusarium verticillioides 7600]	EWG43322.1	95.85	410	17	0	1	410	428	95.7944	1	410	0	822
900	584133950	hypothetical protein FVEG_04854 [Fusarium verticillioides 7600]	EWG43323.1	96.01	752	3	1	1	725	725	100	1	752	0	1480
901	591475511	hypothetical protein FOIG_03401 [Fusarium oxysporum f. sp. cubense tropical race 4 54006]	EXM06683.1	94.35	1256	27	1	1	1212	1212	100	1	1256	0	2209
902	584133952	glutathione reductase [Fusarium verticillioides 7600]	EWG43325.1	99.79	469	1	0	1	469	469	100	38	506	0	966
903	584133955	hypothetical protein FVEG_04857 [Fusarium verticillioides 7600]	EWG43328.1	96.24	426	16	0	1	426	426	100	1	426	0	859
906	517315265	related to DNA damage checkpoint protein [Fusarium fujikuroi IMI 58289]	CCT67230.1	95.9	1171	48	0	1	1171	1171	100	1	1171	0	2185
908	39726385	putative histidine kinase M1JGp [Fusarium verticillioides]	AAR30135.1	94.64	1251	54	3	1	1239	1239	100	1	1250	0	2326
909	591496488	hypothetical protein FOTG_07676 [Fusarium oxysporum f. sp. vasinfectum 25433]	EXM25994.1	85.75	421	9	2	1	370	370	100	137	557	0	701
910	591496487	hypothetical protein FOTG_07675 [Fusarium oxysporum f. sp. vasinfectum 25433]	EXM25993.1	98.67	825	11	0	1	825	825	100	1	825	0	1689
911	584133983	hypothetical protein FVEG_04865 [Fusarium verticillioides 7600]	EWG43356.1	93.31	254	13	2	1	254	254	100	1	250	3e-104	381
912	584133984	hypothetical protein FVEG_04866 [Fusarium verticillioides 7600]	EWG43357.1	97.43	311	8	0	4	314	314	99.0446	7	317	7e-152	540
914	517315272	related to para-aminobenzoic acid synthetase [Fusarium fujikuroi IMI 58289]	CCT67237.1	89.76	830	37	1	1	782	782	100	1	830	0	1532
915	475671113	hypothetical protein FOC4_g10012883 [Fusarium oxysporum f. sp. cubense race 4]	EMT68466.1	98.45	1359	13	1	1	1351	1351	100	1	1359	0	2662
916	829114961	hypercellular protein (hypA) [Fusarium fujikuroi]	KLO91347.1	99.22	387	3	0	1	387	387	100	1	387	0	792
917	342876890	hypothetical protein FOXB_11058 [Fusarium oxysporum Fo5176]	EGU78444.1	98.87	531	6	0	1	531	531	100	1	531	0	1077
918	475671117	hypothetical protein FOC4_g10012887 [Fusarium oxysporum f. sp. cubense race 4]	EMT68470.1	95.17	662	11	1	1	641	641	100	1	662	0	1281
919	590043508	hypothetical protein FOMG_03826 [Fusarium oxysporum f. sp. melonis 26406]	EXK45366.1	87.21	305	39	0	1	305	305	100	62	366	4e-154	547
920	587701437	elongator complex protein 5 [Fusarium oxysporum Fo47]	EWZ48042.1	99.13	343	3	0	1	343	343	100	1	343	0	693
921	584133993	vesicle transporter SEC22 [Fusarium verticillioides 7600]	EWG43366.1	98.6	215	3	0	1	215	215	100	1	215	3e-122	440
922	584133995	hypothetical protein FVEG_04876 [Fusarium verticillioides 7600]	EWG43368.1	93.67	316	5	1	1	301	301	100	1	316	2e-173	611
923	584133996	hypothetical protein FVEG_04877 [Fusarium verticillioides 7600]	EWG43369.1	97.26	657	11	2	1	651	651	100	1	656	0	1255
924	587679654	hypothetical protein FOYG_01408 [Fusarium oxysporum FOSC 3-a]	EWZ01972.1	85.59	236	1	2	1	203	203	100	1	236	7e-110	399
925	584133998	20S proteasome subunit alpha 6 [Fusarium verticillioides 7600]	EWG43371.1	100	244	0	0	1	244	265	92.0755	1	244	2e-142	508
926	517315284	related to 3-phosphoserine aminotransferase [Fusarium fujikuroi IMI 58289]	CCT67249.1	99.06	425	4	0	1	425	425	100	1	425	0	866
927	587701429	tRNA modification GTPase TrmE [Fusarium oxysporum Fo47]	EWZ48034.1	93.71	525	16	1	68	575	575	88.3478	108	632	0	999
928	587744675	hypothetical protein FOVG_07645 [Fusarium oxysporum f. sp. pisi HDV247]	EXA42391.1	100	80	0	0	1	80	81	98.7654	62	141	2e-38	160
929	342876878	hypothetical protein FOXB_11046 [Fusarium oxysporum Fo5176]	EGU78432.1	95.33	813	17	1	1	792	792	100	1	813	0	1608
930	517315288	uncharacterized protein FFUJ_13449 [Fusarium fujikuroi IMI 58289]	CCT67253.1	90.73	248	11	2	1	236	236	100	1	248	3e-90	334
931	584134008	hypothetical protein FVEG_15563 [Fusarium verticillioides 7600]	EWG43381.1	92.38	210	16	0	1	210	210	100	1	210	3e-108	394
932	829138569	Uncharacterized protein Y057_9343 [Fusarium fujikuroi]	KLP11631.1	94.74	1711	20	5	1	1642	1642	100	1	1710	0	3060
933	584134009	hypothetical protein FVEG_04886 [Fusarium verticillioides 7600]	EWG43382.1	90	140	0	1	1	126	126	100	5	144	2e-52	207
934	829114979	Uncharacterized protein LW93_8609 [Fusarium fujikuroi]	KLO91365.1	72.34	188	52	0	2	189	228	82.4561	54	241	3e-69	265
936	517315293	related to mitotic and DNA damage checkpoint protein hus1 [Fusarium fujikuroi IMI 58289]	CCT67257.1	100	322	0	0	1	322	336	95.8333	1	322	0	665
937	591446062	hypothetical protein FOPG_07245 [Fusarium oxysporum f. sp. conglutinans race 2 54008]	EXL78543.1	94.48	1922	83	6	1	1908	1908	100	1	1913	0	3381
938	342876871	hypothetical protein FOXB_11039 [Fusarium oxysporum Fo5176]	EGU78425.1	97.99	1296	11	1	1	1281	1281	100	1	1296	0	2593
939	590043476	hypothetical protein FOMG_03806 [Fusarium oxysporum f. sp. melonis 26406]	EXK45334.1	91.09	718	13	1	1	667	674	98.9614	1	718	0	1342
940	584134022	hypothetical protein FVEG_04893 [Fusarium verticillioides 7600]	EWG43395.1	96.7	455	15	0	1	455	455	100	1	455	0	874
941	475671139	Transcription initiation factor TFIID subunit 13 [Fusarium oxysporum f. sp. cubense race 4]	EMT68492.1	100	163	0	0	1	163	163	100	1	163	1e-88	327
942	587701401	hypothetical protein FOZG_03726 [Fusarium oxysporum Fo47]	EWZ48006.1	100	70	0	0	2	71	71	98.5915	59	128	4e-34	146
944	584134030	hypothetical protein FVEG_04896 [Fusarium verticillioides 7600]	EWG43403.1	94.98	638	6	1	1	612	612	100	1	638	0	1229
945	342886315	hypothetical protein FOXB_03320 [Fusarium oxysporum Fo5176]	EGU86184.1	96.86	1114	35	0	1	1114	1114	100	1	1114	0	2056
946	587701396	hypothetical protein FOZG_03721 [Fusarium oxysporum Fo47]	EWZ48001.1	98.53	272	4	0	1	272	272	100	1	272	9e-155	549
947	477516157	Malic acid transport protein [Fusarium oxysporum f. sp. cubense race 1]	ENH68438.1	98.25	456	8	0	1	456	456	100	1	456	0	910
948	517315304	related to Type 2C Protein Phosphatase [Fusarium fujikuroi IMI 58289]	CCT67266.1	94.94	593	7	1	1	570	570	100	1	593	0	1135
949	517315305	uncharacterized protein FFUJ_13466 [Fusarium fujikuroi IMI 58289]	CCT67267.1	97.41	193	5	0	1	193	193	100	45	237	1e-104	381
950	591475431	hypothetical protein FOIG_03347 [Fusarium oxysporum f. sp. cubense tropical race 4 54006]	EXM06603.1	97.78	766	13	1	1	766	766	100	1	762	0	1510
951	302915525	mitochondrial 37S ribosomal protein RSM27 [Nectria haematococca mpVI 77-13-4]	XP_003051573.1	82.86	105	11	1	1	98	98	100	1	105	2e-44	180
952	584134062	ribonuclease III [Fusarium verticillioides 7600]	EWG43435.1	94.78	345	18	0	1	345	345	100	1	345	0	674
953	517315309	related to endozepine [Fusarium fujikuroi IMI 58289]	CCT67533.1	97.96	294	6	0	1	294	294	100	1	294	2e-160	568
954	584134066	hypothetical protein FVEG_04907 [Fusarium verticillioides 7600]	EWG43439.1	79.61	206	20	1	1	184	184	100	1	206	7e-87	322
955	584134067	NADH-ubiquinone oxidoreductase 78 kDa subunit, mitochondrial [Fusarium verticillioides 7600]	EWG43440.1	100	742	0	0	1	742	742	100	1	742	0	1543
956	591475425	hypothetical protein FOIG_03341 [Fusarium oxysporum f. sp. cubense tropical race 4 54006]	EXM06597.1	94.87	643	10	1	1	620	620	100	26	668	0	1244
957	591475424	alcohol dehydrogenase [Fusarium oxysporum f. sp. cubense tropical race 4 54006]	EXM06596.1	98.66	299	4	0	1	299	299	100	43	341	3e-172	607
958	591475423	hypothetical protein FOIG_03339 [Fusarium oxysporum f. sp. cubense tropical race 4 54006]	EXM06595.1	92.46	358	27	0	1	358	358	100	1	358	0	655
959	584134075	hypothetical protein FVEG_04911 [Fusarium verticillioides 7600]	EWG43448.1	97.41	1005	16	1	1	995	996	99.8996	1	1005	0	1852
960	517315316	probable nucleolar protein [Fusarium fujikuroi IMI 58289]	CCT67277.1	85.27	679	37	3	1	616	616	100	1	679	0	1005
961	517315317	uncharacterized protein FFUJ_13478 [Fusarium fujikuroi IMI 58289]	CCT67278.1	97.54	203	5	0	1	203	203	100	1	203	7e-103	375
962	475671160	Cofilin [Fusarium oxysporum f. sp. cubense race 4]	EMT68513.1	100	153	0	0	1	153	153	100	1	153	4e-84	312
963	342886297	hypothetical protein FOXB_03302 [Fusarium oxysporum Fo5176]	EGU86166.1	93.09	564	0	2	3	527	548	95.8029	523	1086	0	1025
964	517315319	uncharacterized protein FFUJ_13480 [Fusarium fujikuroi IMI 58289]	CCT67280.1	84.47	528	48	1	1	494	494	100	1	528	0	877
965	342886296	hypothetical protein FOXB_03301 [Fusarium oxysporum Fo5176]	EGU86165.1	96.4	139	5	0	1	139	140	99.2857	1	139	6e-65	248
966	517315321	uncharacterized protein FFUJ_13482 [Fusarium fujikuroi IMI 58289]	CCT67282.1	97.22	144	4	0	1	144	144	100	1	144	9e-69	261
967	517315322	uncharacterized protein FFUJ_13483 [Fusarium fujikuroi IMI 58289]	CCT67283.1	98.65	148	2	0	1	148	148	100	1	148	4e-78	292
968	477516138	hypothetical protein FOC1_g10014202 [Fusarium oxysporum f. sp. cubense race 1]	ENH68419.1	79.37	252	7	2	1	207	207	100	1	252	8e-108	392
969	591475408	hypothetical protein FOIG_03328 [Fusarium oxysporum f. sp. cubense tropical race 4 54006]	EXM06580.1	85.81	310	35	3	1	310	310	100	82	382	8e-118	426
970	475671169	hypothetical protein FOC4_g10012938 [Fusarium oxysporum f. sp. cubense race 4]	EMT68522.1	84.28	159	16	1	1	150	150	100	1	159	1e-72	274
971	475671170	hypothetical protein FOC4_g10012939 [Fusarium oxysporum f. sp. cubense race 4]	EMT68523.1	91.72	157	11	2	1	157	158	99.3671	1	155	3e-63	243
972	517315326	uncharacterized protein FFUJ_13487 [Fusarium fujikuroi IMI 58289]	CCT67287.1	93.9	164	10	0	1	164	164	100	1	164	2e-85	317
973	584134094	hypothetical protein FVEG_04925 [Fusarium verticillioides 7600]	EWG43467.1	99.47	380	2	0	1	380	380	100	1	380	0	780
974	584134096	hypothetical protein FVEG_04926 [Fusarium verticillioides 7600]	EWG43469.1	89.84	443	23	2	2	422	422	99.763	26	468	0	730
975	517315329	probable glyceraldehyde 3-phosphate dehydrogenase (ccg-7) [Fusarium fujikuroi IMI 58289]	CCT67290.1	100	338	0	0	1	338	338	100	1	338	0	685
976	829115017	uncharacterized protein LW93_8647 [Fusarium fujikuroi]	KLO91403.1	90.86	788	38	3	1	757	757	100	1	785	0	1333
977	584134103	hypothetical protein FVEG_04929 [Fusarium verticillioides 7600]	EWG43476.1	77.79	905	86	5	1	791	791	100	1	904	0	1370
978	342881885	hypothetical protein FOXB_06822 [Fusarium oxysporum Fo5176]	EGU82670.1	100	473	0	0	1	473	473	100	1	473	0	963
979	591445627	hypothetical protein FOPG_07549 [Fusarium oxysporum f. sp. conglutinans race 2 54008]	EXL78118.1	92.7	274	20	0	1	274	276	99.2754	30	303	3e-142	507
980	342881887	hypothetical protein FOXB_06824 [Fusarium oxysporum Fo5176]	EGU82672.1	97.52	443	11	0	1	443	443	100	10	452	0	855
981	591445630	hypothetical protein FOPG_07552 [Fusarium oxysporum f. sp. conglutinans race 2 54008]	EXL78121.1	91.28	493	6	1	1	456	456	100	1	493	0	904
982	584134114	hypothetical protein FVEG_04933 [Fusarium verticillioides 7600]	EWG43487.1	93.22	339	16	1	1	332	332	100	1	339	5e-170	600
983	517315337	related to SEC31 protein [Fusarium fujikuroi IMI 58289]	CCT67297.1	92.09	1277	26	6	1	1204	1204	100	1	1275	0	2260
984	584134120	peptidylprolyl isomerase [Fusarium verticillioides 7600]	EWG43493.1	98.61	144	2	0	1	144	144	100	1	144	1e-76	288
985	517315339	uncharacterized protein FFUJ_13500 [Fusarium fujikuroi IMI 58289]	CCT67299.1	96.97	99	3	0	1	99	99	100	1	99	7e-49	195
986	517315340	probable COX12-cytochrome-c oxidase, subunit VIB [Fusarium fujikuroi IMI 58289]	CCT67300.1	97	100	3	0	1	100	100	100	1	100	1e-52	207
987	477516119	UPF0667 family protein C31G5.18c [Fusarium oxysporum f. sp. cubense race 1]	ENH68400.1	97.49	239	4	1	7	245	246	97.1545	1	237	1e-130	468
988	342874093	hypothetical protein FOXB_13338 [Fusarium oxysporum Fo5176]	EGU76166.1	100	165	0	0	1	165	165	100	1	165	1e-90	334
989	342874092	hypothetical protein FOXB_13337 [Fusarium oxysporum Fo5176]	EGU76165.1	90.97	288	26	0	1	288	288	100	1	288	4e-151	537
990	591475375	other hect domain ubiquitin protein ligase E3 [Fusarium oxysporum f. sp. cubense tropical race 4 54006]	EXM06547.1	95.93	1227	50	0	1	1227	1227	100	1	1227	0	2415
991	517315345	related to ribosomal protein MRP49 [Fusarium fujikuroi IMI 58289]	CCT67535.1	99.51	203	1	0	1	203	203	100	1	203	1e-114	414
992	587744781	hypothetical protein FOVG_07714 [Fusarium oxysporum f. sp. pisi HDV247]	EXA42497.1	96.53	721	21	1	1	721	721	100	1	717	0	1434
993	342874088	hypothetical protein FOXB_13333 [Fusarium oxysporum Fo5176]	EGU76161.1	98.72	156	2	0	1	156	156	100	1	156	2e-83	310
994	584134135	hypothetical protein FVEG_04945 [Fusarium verticillioides 7600]	EWG43508.1	93.68	190	12	0	1	190	190	100	1	190	7e-90	332
995	517315349	probable transport vesicle fusion protein SEC17 [Fusarium fujikuroi IMI 58289]	CCT67308.1	99.66	293	1	0	1	293	293	100	1	293	2e-168	594
996	584134137	glucoamylase [Fusarium verticillioides 7600]	EWG43510.1	92.99	670	19	2	1	642	642	100	10	679	0	1218
997	829116677	uncharacterized protein Y057_1474 [Fusarium fujikuroi]	KLO92998.1	71.03	107	24	1	1	107	107	100	1	100	2e-27	124
998	584134139	hypothetical protein FVEG_04948 [Fusarium verticillioides 7600]	EWG43512.1	96.58	644	21	1	1	644	644	100	1	643	0	1131
999	584134142	hypothetical protein FVEG_15575 [Fusarium verticillioides 7600]	EWG43515.1	94.81	77	4	0	1	77	91	84.6154	1	77	3e-35	150
1000	584134143	hypothetical protein FVEG_15576 [Fusarium verticillioides 7600]	EWG43516.1	97.78	854	19	0	1	854	854	100	1	854	0	1639
1001	342874083	hypothetical protein FOXB_13328 [Fusarium oxysporum Fo5176]	EGU76156.1	86.65	352	6	1	1	311	311	100	1	352	2e-174	614
1002	342874082	hypothetical protein FOXB_13327 [Fusarium oxysporum Fo5176]	EGU76155.1	99.68	312	1	0	1	312	312	100	1	312	3e-180	634
1003	517315355	related to branch point bridging protein (MSL5) [Fusarium fujikuroi IMI 58289]	CCT67314.1	90.26	503	25	3	1	492	536	91.791	1	490	0	799
1004	590043374	hypothetical protein FOMG_03739 [Fusarium oxysporum f. sp. melonis 26406]	EXK45232.1	94.34	318	2	1	1	302	302	100	1	318	4e-172	607
1005	829115043	Uncharacterized protein LW93_8673 [Fusarium fujikuroi]	KLO91429.1	98.79	1155	10	1	1	1155	1155	100	1	1151	0	2313
1006	584134150	hypothetical protein FVEG_04956 [Fusarium verticillioides 7600]	EWG43523.1	92.5	653	21	1	1	625	625	100	1	653	0	1164
1007	587679522	DNA polymerase iota subunit [Fusarium oxysporum FOSC 3-a]	EWZ01840.1	75.86	319	53	3	36	330	331	89.1239	181	499	9e-126	453
1008	829115046	glucan 1,4-alpha-glucosidase [Fusarium fujikuroi]	KLO91432.1	96.54	463	16	0	1	463	463	100	1	463	0	858
1009	342874076	hypothetical protein FOXB_13321 [Fusarium oxysporum Fo5176]	EGU76149.1	74.62	394	41	3	1	381	394	96.7005	1	348	3e-160	568
1010	517315363	probable 60s ribosomal protein l3 (rpl3) [Fusarium fujikuroi IMI 58289]	CCT67536.1	99.49	391	2	0	1	391	391	100	1	391	0	804
1011	584134160	hypothetical protein FVEG_04962 [Fusarium verticillioides 7600]	EWG43533.1	97.46	787	6	1	1	773	773	100	78	864	0	1360
1013	342880700	hypothetical protein FOXB_07776 [Fusarium oxysporum Fo5176]	EGU81726.1	99.76	420	1	0	1	420	420	100	65	484	0	882
1014	517315366	related to transcription regulator SPT7 [Fusarium fujikuroi IMI 58289]	CCT67324.1	99.3	1143	8	0	1	1143	1143	100	1	1143	0	2343
1015	584134164	hypothetical protein FVEG_04965 [Fusarium verticillioides 7600]	EWG43537.1	98.52	203	3	0	1	203	203	100	93	295	4e-114	413
1016	584134166	hypothetical protein FVEG_15578 [Fusarium verticillioides 7600]	EWG43539.1	76.67	210	48	1	22	231	231	90.9091	1	209	9e-85	316
1017	587679502	hypothetical protein FOYG_01310 [Fusarium oxysporum FOSC 3-a]	EWZ01820.1	100	202	0	0	1	202	202	100	1	202	1e-113	412
1018	591475327	hypothetical protein FOIG_03277 [Fusarium oxysporum f. sp. cubense tropical race 4 54006]	EXM06499.1	91.24	936	40	1	15	908	908	98.4581	47	982	0	1749
1019	590070013	hypothetical protein FOQG_02698 [Fusarium oxysporum f. sp. raphani 54005]	EXK97537.1	87.36	997	59	7	1	962	962	100	1	965	0	1568
1020	829115058	protein tyrosine phosphatase phi [Fusarium fujikuroi]	KLO91444.1	98.31	472	8	0	1	472	472	100	1	472	0	964
1021	591496309	hypothetical protein FOTG_07557 [Fusarium oxysporum f. sp. vasinfectum 25433]	EXM25815.1	96.86	605	18	1	1	604	604	100	1	605	0	1208
1022	829115060	conserved oligomeric Golgi complex component 3 [Fusarium fujikuroi]	KLO91446.1	95.1	143	7	0	1	143	161	88.8199	1	143	9e-75	281
1023	477516086	Oligomeric Golgi complex subunit 3 [Fusarium oxysporum f. sp. cubense race 1]	ENH68367.1	99.1	557	5	0	13	569	569	97.891	200	756	0	1166
1024	829115061	carrier protein YMC1, mitochondrial [Fusarium fujikuroi]	KLO91447.1	100	300	0	0	1	300	300	100	1	300	9e-176	619
1025	590043337	hypothetical protein FOMG_03714 [Fusarium oxysporum f. sp. melonis 26406]	EXK45195.1	98.09	787	15	0	1	787	787	100	27	813	0	1598
1026	517315377	uncharacterized protein FFUJ_13538 [Fusarium fujikuroi IMI 58289]	CCT67558.1	99.64	278	1	0	1	278	278	100	1	278	1e-156	555
1027	587744833	hypothetical protein FOVG_07747 [Fusarium oxysporum f. sp. pisi HDV247]	EXA42549.1	87.43	501	62	1	1	500	511	97.8474	1	501	0	835
1028	584134180	hypothetical protein FVEG_04977 [Fusarium verticillioides 7600]	EWG43553.1	87.63	388	47	1	36	422	422	91.7062	42	429	0	664
1029	584134181	hypothetical protein FVEG_04978 [Fusarium verticillioides 7600]	EWG43554.1	98.51	605	9	0	1	605	605	100	1	605	0	1241
1030	584134182	mannosyl-oligosaccharide alpha-1,2-mannosidase [Fusarium verticillioides 7600]	EWG43555.1	96.22	979	27	1	1	969	969	100	1	979	0	1914
1031	342874126	hypothetical protein FOXB_13268 [Fusarium oxysporum Fo5176]	EGU76196.1	99.46	556	3	0	1	556	556	100	1	556	0	1135
1032	590043327	acetyltransferase [Fusarium oxysporum f. sp. melonis 26406]	EXK45185.1	97.66	556	13	0	1	556	556	100	1	556	0	1132
1033	587744842	30S ribosomal protein S2 [Fusarium oxysporum f. sp. pisi HDV247]	EXA42558.1	93.42	547	26	1	1	537	537	100	1	547	0	1033
1034	342874129	hypothetical protein FOXB_13271 [Fusarium oxysporum Fo5176]	EGU76199.1	97.16	668	3	1	1	652	652	100	1	668	0	1285
1035	517315386	uncharacterized protein FFUJ_13547 [Fusarium fujikuroi IMI 58289]	CCT67341.1	89.89	277	28	0	1	277	277	100	1	277	1e-146	521
1036	342874131	hypothetical protein FOXB_13273 [Fusarium oxysporum Fo5176]	EGU76201.1	96.46	790	26	1	54	841	841	93.698	1	790	0	1504
1037	591475305	hypothetical protein FOIG_03257 [Fusarium oxysporum f. sp. cubense tropical race 4 54006]	EXM06477.1	93.86	1189	64	1	1	1180	1180	100	1	1189	0	2302
1038	477516071	T-complex protein 1 subunit zeta [Fusarium oxysporum f. sp. cubense race 1]	ENH68352.1	99.63	546	2	0	1	546	546	100	1	546	0	1112
1039	587721567	hypothetical protein FOWG_05860 [Fusarium oxysporum f. sp. lycopersici MN25]	EWZ92904.1	97.26	401	11	0	1	401	401	100	1	401	0	797
1040	342874134	hypothetical protein FOXB_13276 [Fusarium oxysporum Fo5176]	EGU76204.1	99.13	231	2	0	1	231	231	100	1	231	2e-132	474
1041	591496284	DNA ligase 1 [Fusarium oxysporum f. sp. vasinfectum 25433]	EXM25790.1	95.05	869	19	1	1	845	858	98.4848	1	869	0	1667
1042	475671247	AP-2 complex subunit beta [Fusarium oxysporum f. sp. cubense race 4]	EMT68600.1	99.87	745	1	0	1	745	745	100	1	745	0	1528
1043	342874137	hypothetical protein FOXB_13279 [Fusarium oxysporum Fo5176]	EGU76207.1	98.91	92	1	0	1	92	92	100	1	92	3e-47	190
1044	587701242	hypothetical protein FOZG_03616 [Fusarium oxysporum Fo47]	EWZ47847.1	81.4	301	6	1	1	251	251	100	52	352	3e-133	477
1045	408399586	hypothetical protein FPSE_01173 [Fusarium pseudograminearum CS3096]	EKJ78685.1	87.41	294	35	1	1	294	313	93.9297	1	292	7e-145	516
1046	587679466	hypothetical protein FOYG_01280 [Fusarium oxysporum FOSC 3-a]	EWZ01784.1	95.93	246	10	0	1	246	246	100	1	246	3e-121	437
1047	591445729	hypothetical protein FOPG_07619 [Fusarium oxysporum f. sp. conglutinans race 2 54008]	EXL78220.1	98.8	1421	17	0	1	1421	1421	100	1	1421	0	2893
1048	584134207	hypothetical protein FVEG_04996 [Fusarium verticillioides 7600]	EWG43580.1	91.88	308	25	0	1	308	308	100	1	308	7e-163	576
1049	587744864	hypothetical protein FOVG_07771 [Fusarium oxysporum f. sp. pisi HDV247]	EXA42580.1	72.73	385	99	3	1	384	384	100	15	394	1e-159	566
1050	584134209	hypothetical protein FVEG_04998 [Fusarium verticillioides 7600]	EWG43582.1	99.14	467	4	0	1	467	467	100	1	467	0	966
1051	829115087	putative glycosyl hydrolase [Fusarium fujikuroi]	KLO91473.1	98.57	768	11	0	1	768	768	100	1	768	0	1591
1052	829128445	bck1-like MAPKKK (ask1) [Fusarium fujikuroi]	KLP03262.1	95.66	1453	23	3	297	1709	1709	82.6799	9	1461	0	2676
1053	342874146	hypothetical protein FOXB_13288 [Fusarium oxysporum Fo5176]	EGU76216.1	64.91	265	61	4	3	264	265	98.8679	1	236	3e-76	288
1054	584134220	hypothetical protein FVEG_05001 [Fusarium verticillioides 7600]	EWG43593.1	98.08	156	3	0	1	156	156	100	1	156	1e-85	317
1055	517315404	probable xylulose-5-phosphate phosphoketolase [Fusarium fujikuroi IMI 58289]	CCT67358.1	99.88	819	1	0	1	819	819	100	1	819	0	1706
1056	342874149	hypothetical protein FOXB_13291 [Fusarium oxysporum Fo5176]	EGU76219.1	94.06	202	12	0	1	202	202	100	1	202	3e-111	404
1057	584134226	DNA mismatch repair protein msh-2 [Fusarium verticillioides 7600]	EWG43599.1	99.46	927	5	0	1	927	927	100	1	927	0	1915
1058	584134227	hypothetical protein FVEG_05005 [Fusarium verticillioides 7600]	EWG43600.1	95.53	515	23	0	1	515	515	100	1	515	0	941
1059	584134228	hypothetical protein FVEG_15586 [Fusarium verticillioides 7600]	EWG43601.1	94.99	779	17	1	1	757	757	100	1	779	0	1526
1060	342881690	hypothetical protein FOXB_06961 [Fusarium oxysporum Fo5176]	EGU82524.1	97.78	135	3	0	1	135	135	100	1	135	7e-60	232
1061	584134237	kinesin family member 22 [Fusarium verticillioides 7600]	EWG43610.1	98.74	714	9	0	1	714	714	100	1	714	0	1431
1062	475671268	Altered inheritance of mitochondria protein 24, mitochondrial [Fusarium oxysporum f. sp. cubense race 4]	EMT68621.1	97.95	390	8	0	1	390	390	100	1	390	0	777
1063	342881693	hypothetical protein FOXB_06964 [Fusarium oxysporum Fo5176]	EGU82527.1	98.11	477	9	0	1	477	477	100	1	477	0	945
1064	517315413	probable NADH2 dehydrogenase (ubiquinone) 21.3K chain [Fusarium fujikuroi IMI 58289]	CCT67367.1	98.42	190	3	0	1	190	192	98.9583	1	190	2e-105	384
1065	584134245	tRNA (guanine-N(1)-)-methyltransferase [Fusarium verticillioides 7600]	EWG43618.1	94.63	410	22	0	1	410	410	100	1	410	0	754
1066	590043261	DNA primase small subunit [Fusarium oxysporum f. sp. melonis 26406]	EXK45119.1	98.4	499	8	0	1	499	499	100	1	499	0	1024
1067	584134247	hypothetical protein FVEG_05015 [Fusarium verticillioides 7600]	EWG43620.1	98.47	196	3	0	1	196	196	100	910	1105	7e-110	399
1068	590043260	hypothetical protein FOMG_03665 [Fusarium oxysporum f. sp. melonis 26406]	EXK45118.1	96.67	870	29	0	1	870	871	99.8852	1	870	0	1751
1069	584134248	hypothetical protein FVEG_05016 [Fusarium verticillioides 7600]	EWG43621.1	98.48	264	4	0	1	264	264	100	1	264	7e-153	543
1070	517315418	probable succinyl-CoA:3-ketoacid-coenzyme A transferase, mitochondrial precursor [Fusarium fujikuroi IMI 58289]	CCT67372.1	100	519	0	0	1	519	519	100	1	519	0	1063
1071	517315419	uncharacterized protein FFUJ_13580 [Fusarium fujikuroi IMI 58289]	CCT67373.1	89.96	478	19	1	1	449	450	99.7778	1	478	0	879
1072	517315420	uncharacterized protein FFUJ_13581 [Fusarium fujikuroi IMI 58289]	CCT67374.1	84.17	278	44	0	1	278	278	100	1	278	9e-118	426
1073	584134252	hypothetical protein FVEG_05020 [Fusarium verticillioides 7600]	EWG43625.1	97.39	230	6	0	17	246	256	89.8438	17	246	4e-78	294
1074	584134254	hypothetical protein FVEG_05021 [Fusarium verticillioides 7600]	EWG43627.1	94.21	570	25	2	1	570	570	100	1	562	0	887
1075	342883641	hypothetical protein FOXB_05393 [Fusarium oxysporum Fo5176]	EGU84095.1	99.71	349	1	0	1	349	349	100	1	349	0	717
1076	584134256	hypothetical protein FVEG_05023 [Fusarium verticillioides 7600]	EWG43629.1	99.41	339	2	0	1	339	339	100	1	339	0	692
1077	584134257	translation initiation factor IF-2 [Fusarium verticillioides 7600]	EWG43630.1	95.95	1038	40	1	1	1038	1038	100	1	1036	0	1871
1078	587679412	pre-rRNA-processing protein TSR3 [Fusarium oxysporum FOSC 3-a]	EWZ01730.1	91.71	398	14	2	1	380	380	100	1	397	0	685
1079	517315427	probable Arf-binding protein [Fusarium fujikuroi IMI 58289]	CCT67381.1	98.09	628	12	0	1	628	628	100	1	628	0	1269
1080	590043244	hypothetical protein FOMG_03652 [Fusarium oxysporum f. sp. melonis 26406]	EXK45102.1	100	174	0	0	1	174	174	100	495	668	2e-96	354
1081	517315428	uncharacterized protein FFUJ_13589 [Fusarium fujikuroi IMI 58289]	CCT67382.1	97.14	455	13	0	1	455	462	98.4848	1	455	0	808
1082	584134263	hypothetical protein FVEG_05028 [Fusarium verticillioides 7600]	EWG43636.1	95.74	329	14	0	1	329	329	100	96	424	0	644
1083	517315430	related to eukaryotic translation initiation factor 3 subunit 9 [Fusarium fujikuroi IMI 58289]	CCT67384.1	95.72	584	16	1	30	604	604	95.1987	91	674	0	1114
1084	590070113	hypothetical protein FOQG_02767 [Fusarium oxysporum f. sp. raphani 54005]	EXK97637.1	98.82	594	7	0	1	594	594	100	1	594	0	1199
1085	517315432	related to nucleolar rRNA processing protein GAR1 [Fusarium fujikuroi IMI 58289]	CCT67386.1	85.74	687	36	3	1	649	649	100	1	663	0	1136
1086	475671294	hypothetical protein FOC4_g10013066 [Fusarium oxysporum f. sp. cubense race 4]	EMT68647.1	95.73	117	5	0	1	117	117	100	1	117	2e-58	227
1087	829115121	transcription factor BOM [Fusarium fujikuroi]	KLO91507.1	87.45	789	27	4	1	717	717	100	1	789	0	1318
1088	584134273	hypothetical protein FVEG_05034 [Fusarium verticillioides 7600]	EWG43646.1	82.91	357	60	1	1	357	369	96.748	1	356	7e-173	610
1089	584134279	translation initiation factor eIF-2B subunit epsilon [Fusarium verticillioides 7600]	EWG43652.1	88.75	711	27	2	1	658	666	98.7988	1	711	0	1262
1090	829115124	SKN7 protein [Fusarium fujikuroi]	KLO91510.1	99.49	586	3	0	1	586	586	100	1	586	0	1224
1091	584134284	hypothetical protein FVEG_05037 [Fusarium verticillioides 7600]	EWG43657.1	98.41	1260	20	0	1	1260	1260	100	1	1260	0	2580
1092	902734449	hypothetical protein FOXG_08115 [Fusarium oxysporum f. sp. lycopersici 4287]	KNB06018.1	79.13	436	26	2	1	371	371	100	1	436	0	678
1093	584134287	hypothetical protein FVEG_05039 [Fusarium verticillioides 7600]	EWG43660.1	94.74	627	29	1	1	627	627	100	1	623	0	1220
1094	591496194	hypothetical protein FOTG_07478 [Fusarium oxysporum f. sp. vasinfectum 25433]	EXM25700.1	98.32	1489	25	0	1	1489	1489	100	1	1489	0	2916
1095	587679384	hypothetical protein FOYG_01229 [Fusarium oxysporum FOSC 3-a]	EWZ01702.1	99.52	414	2	0	1	414	414	100	1	414	0	847
1096	517315443	uncharacterized protein FFUJ_13604 [Fusarium fujikuroi IMI 58289]	CCT67395.1	97.92	530	11	0	1	530	530	100	1	530	0	1044
1097	584134297	hypothetical protein FVEG_05043 [Fusarium verticillioides 7600]	EWG43670.1	94.59	739	40	0	1	739	739	100	1	739	0	1273
1098	342884309	hypothetical protein FOXB_04957 [Fusarium oxysporum Fo5176]	EGU84539.1	99.43	349	2	0	1	349	349	100	1	349	0	701
1099	587744959	hypothetical protein FOVG_07829 [Fusarium oxysporum f. sp. pisi HDV247]	EXA42675.1	98.59	778	11	0	1	778	778	100	1	778	0	1608
1100	584134300	phosphatidylserine synthase [Fusarium verticillioides 7600]	EWG43673.1	95.36	237	0	1	1	226	226	100	8	244	4e-115	417
1101	591475194	hypothetical protein FOIG_03190 [Fusarium oxysporum f. sp. cubense tropical race 4 54006]	EXM06366.1	88.15	768	48	2	1	725	725	100	1	768	0	1350
1102	342884305	hypothetical protein FOXB_04953 [Fusarium oxysporum Fo5176]	EGU84535.1	100	210	0	0	1	210	210	100	1	210	1e-104	382
1103	587679363	hypothetical protein FOYG_01221 [Fusarium oxysporum FOSC 3-a]	EWZ01681.1	94.44	917	19	2	1	886	886	100	1	916	0	1661
1104	475671312	hypothetical protein FOC4_g10013085 [Fusarium oxysporum f. sp. cubense race 4]	EMT68665.1	93.39	499	13	1	1	479	479	100	1	499	0	915
1105	475671313	Phospholipid:diacylglycerol acyltransferase [Fusarium oxysporum f. sp. cubense race 4]	EMT68666.1	99.37	638	4	0	1	638	638	100	1	638	0	1320
1106	477516006	N-alpha-acetyltransferase 30, NatC catalytic subunit [Fusarium oxysporum f. sp. cubense race 1]	ENH68287.1	100	186	0	0	1	186	186	100	1	186	1e-105	384
1107	584134314	hypothetical protein FVEG_05053 [Fusarium verticillioides 7600]	EWG43687.1	97.89	284	6	0	1	284	284	100	17	300	3e-165	584
1108	475671316	WD repeat-containing protein 85 like protein [Fusarium oxysporum f. sp. cubense race 4]	EMT68669.1	92.16	408	32	0	1	408	408	100	1	408	0	765
1109	587744986	hypothetical protein FOVG_07840 [Fusarium oxysporum f. sp. pisi HDV247]	EXA42702.1	96.94	1274	17	2	1	1252	1252	100	1	1274	0	2534
1110	591496147	hypothetical protein FOTG_07458 [Fusarium oxysporum f. sp. vasinfectum 25433]	EXM25653.1	96.03	730	29	0	1	730	730	100	1	730	0	1459
1111	342884296	hypothetical protein FOXB_04944 [Fusarium oxysporum Fo5176]	EGU84526.1	95.42	240	11	0	1	240	240	100	1	240	1e-133	479
1112	517315459	related to negative acting factor [Fusarium fujikuroi IMI 58289]	CCT67411.1	95.44	592	5	1	1	570	570	100	1	592	0	1172
1113	342884294	hypothetical protein FOXB_04942 [Fusarium oxysporum Fo5176]	EGU84524.1	98.97	97	1	0	1	97	97	100	1	97	2e-48	194
1114	1040029457	hypothetical protein FPOA_08520 [Fusarium poae]	OBS22184.1	88.37	946	34	5	1	875	875	100	1	941	0	1680
1115	924820184	Mitogen-activated protein kinase [Escovopsis weberi]	KOS18141.1	80.9	356	7	4	1	295	295	100	1	356	1e-159	565
1116	587701085	oxidation resistance protein 1 [Fusarium oxysporum Fo47]	EWZ47690.1	99.07	324	3	0	1	324	324	100	1	324	0	661
1117	584134328	uroporphyrinogen-III synthase [Fusarium verticillioides 7600]	EWG43701.1	95.95	321	13	0	1	321	321	100	1	321	0	641
1118	829115153	putative aflatoxin efflux pump AFLT [Fusarium fujikuroi]	KLO91539.1	91.25	503	10	2	1	472	472	100	30	529	0	908
1119	584134334	hypothetical protein FVEG_05067 [Fusarium verticillioides 7600]	EWG43707.1	86.46	628	37	2	10	589	592	97.973	59	686	0	1102
1120	342877158	hypothetical protein FOXB_10851 [Fusarium oxysporum Fo5176]	EGU78665.1	98.38	185	3	0	1	185	185	100	1	185	4e-103	376
1121	584134337	pyruvate decarboxylase [Fusarium verticillioides 7600]	EWG43710.1	99.47	570	3	0	1	570	570	100	1	570	0	1189
1122	587679319	hypothetical protein FOYG_01200 [Fusarium oxysporum FOSC 3-a]	EWZ01637.1	97.22	324	9	0	1	324	359	90.2507	1	324	3e-168	594
1123	475671331	hypothetical protein FOC4_g10013106 [Fusarium oxysporum f. sp. cubense race 4]	EMT68684.1	89.38	546	54	1	1	546	546	100	1	542	0	927
1124	584134340	hypothetical protein FVEG_05072 [Fusarium verticillioides 7600]	EWG43713.1	91.74	642	43	4	1	636	636	100	1	638	0	1105
1125	517315472	related to DNA repair protein rad18 [Fusarium fujikuroi IMI 58289]	CCT67423.1	95.53	1163	32	2	1	1143	1143	100	1	1163	0	2237
1126	591496117	hypothetical protein FOTG_07442 [Fusarium oxysporum f. sp. vasinfectum 25433]	EXM25623.1	89.17	240	8	1	1	222	222	100	42	281	1e-121	438
1127	587701053	hypothetical protein FOZG_03523 [Fusarium oxysporum Fo47]	EWZ47658.1	97.96	491	8	1	1	491	491	100	1	489	0	675
1128	587745038	hypothetical protein FOVG_07860 [Fusarium oxysporum f. sp. pisi HDV247]	EXA42754.1	99.48	193	1	0	1	193	193	100	1	193	3e-109	396
1129	587745039	signal recognition particle subunit SRP14 [Fusarium oxysporum f. sp. pisi HDV247]	EXA42755.1	99.22	128	1	0	1	128	128	100	27	154	1e-68	261
1130	587701050	hypothetical protein FOZG_03520 [Fusarium oxysporum Fo47]	EWZ47655.1	89.11	872	36	3	1	814	814	100	1	871	0	1473
1131	342877147	hypothetical protein FOXB_10840 [Fusarium oxysporum Fo5176]	EGU78654.1	94.69	508	1	1	1	482	482	100	1	508	0	946
1132	342877146	hypothetical protein FOXB_10839 [Fusarium oxysporum Fo5176]	EGU78653.1	98.26	574	10	0	1	574	574	100	1	574	0	1184
1133	587745045	DNA repair and recombination protein RAD54 and RAD54-like protein [Fusarium oxysporum f. sp. pisi HDV247]	EXA42761.1	95.99	898	9	1	1	871	871	100	1	898	0	1670
1134	342877144	hypothetical protein FOXB_10837 [Fusarium oxysporum Fo5176]	EGU78651.1	94.64	280	15	0	1	280	281	99.6441	1	280	2e-151	538
1135	584134361	DnaJ like subfamily C member 3 [Fusarium verticillioides 7600]	EWG43734.1	99.04	522	5	0	1	522	522	100	1	522	0	1066
1136	584134362	solute carrier family 25, member 46 [Fusarium verticillioides 7600]	EWG43735.1	75.16	310	22	3	1	255	255	100	1	310	1e-117	426
1137	587701033	hypothetical protein FOZG_03513 [Fusarium oxysporum Fo47]	EWZ47638.1	99.07	643	6	0	1	643	644	99.8447	172	814	0	1341
1138	342877141	hypothetical protein FOXB_10834 [Fusarium oxysporum Fo5176]	EGU78648.1	95.1	102	5	0	1	102	103	99.0291	1	102	1e-51	204
1139	475671349	Oligomeric Golgi complex subunit 6 [Fusarium oxysporum f. sp. cubense race 4]	EMT68702.1	99.13	693	6	0	1	693	693	100	1	693	0	1402
1140	517315486	probable SAP1-member of the AAA-protein family [Fusarium fujikuroi IMI 58289]	CCT67436.1	93.22	767	25	1	1	740	740	100	37	803	0	1406
1141	342877139	hypothetical protein FOXB_10832 [Fusarium oxysporum Fo5176]	EGU78646.1	97.02	168	5	0	1	168	168	100	1	168	9e-90	331
1142	475671353	Ribosomal RNA small subunit methyltransferase NEP1 [Fusarium oxysporum f. sp. cubense race 4]	EMT68706.1	90.73	259	0	1	1	235	235	100	1	259	2e-131	471
1143	342877137	hypothetical protein FOXB_10830 [Fusarium oxysporum Fo5176]	EGU78644.1	98.29	759	12	1	1	759	759	100	1	758	0	1391
1144	342877136	hypothetical protein FOXB_10829 [Fusarium oxysporum Fo5176]	EGU78643.1	95.4	609	9	2	1	595	595	100	1	604	0	1191
1145	517315491	uncharacterized protein FFUJ_13652 [Fusarium fujikuroi IMI 58289]	CCT67441.1	93.95	512	16	1	1	497	497	100	1	512	0	988
1146	587745072	DnaJ like subfamily A member 5 [Fusarium oxysporum f. sp. pisi HDV247]	EXA42788.1	95.46	529	23	1	1	529	530	99.8113	1	528	0	979
1147	584134382	cysteine protease ATG4 [Fusarium verticillioides 7600]	EWG43755.1	99.11	449	4	0	1	449	449	100	5	453	0	928
1148	829101849	uncharacterized protein LW93_13767 [Fusarium fujikuroi]	KLO78780.1	93.86	635	30	2	1	626	626	100	1	635	0	1082
1149	584134384	histone H2B [Fusarium verticillioides 7600]	EWG43757.1	100	138	0	0	1	138	138	100	1	138	3e-72	273
1150	913875265	hypothetical protein BN1723_012620 [Verticillium longisporum]	CRK22237.1	98.51	134	2	0	1	134	134	100	1	134	7e-71	268
1151	342877129	hypothetical protein FOXB_10822 [Fusarium oxysporum Fo5176]	EGU78636.1	97.37	76	2	0	1	76	76	100	1	76	8e-36	152
1152	475669097	hypothetical protein FOC4_g10003394 [Fusarium oxysporum f. sp. cubense race 4]	EMT66859.1	83.22	149	25	0	7	155	160	93.125	48	196	4e-68	259
1153	475669098	hypothetical protein FOC4_g10003395 [Fusarium oxysporum f. sp. cubense race 4]	EMT66860.1	88.08	193	7	1	1	177	177	100	435	627	1e-94	348
1154	342885319	hypothetical protein FOXB_04071 [Fusarium oxysporum Fo5176]	EGU85360.1	99.3	430	3	0	1	430	430	100	1	430	0	867
1155	342885325	hypothetical protein FOXB_04077 [Fusarium oxysporum Fo5176]	EGU85366.1	97.06	919	27	0	1	919	919	100	1	919	0	1659
1156	587700995	hypothetical protein FOZG_03489 [Fusarium oxysporum Fo47]	EWZ47600.1	97.55	368	9	0	1	368	368	100	1	368	0	745
1157	342885323	hypothetical protein FOXB_04075 [Fusarium oxysporum Fo5176]	EGU85364.1	91.47	375	11	1	1	354	354	100	1	375	0	700
1158	517315503	uncharacterized protein FFUJ_13664 [Fusarium fujikuroi IMI 58289]	CCT67453.1	95.73	702	29	1	1	702	702	100	1	701	0	1307
1159	584144531	hypothetical protein FVEG_12165 [Fusarium verticillioides 7600]	EWG53820.1	96.42	335	12	0	7	341	341	98.2405	3	337	0	677
1160	584144529	hypothetical protein FVEG_12164 [Fusarium verticillioides 7600]	EWG53818.1	91.78	426	28	3	1	423	423	100	1	422	0	701
1161	342885326	hypothetical protein FOXB_04078 [Fusarium oxysporum Fo5176]	EGU85367.1	95.73	328	14	0	1	328	328	100	1	328	0	638
1162	342885327	hypothetical protein FOXB_04079 [Fusarium oxysporum Fo5176]	EGU85368.1	99.38	805	5	0	1	805	805	100	1	805	0	1657
1163	475669108	Ribosome assembly protein 3 [Fusarium oxysporum f. sp. cubense race 4]	EMT66870.1	71.05	76	1	1	1	55	55	100	1	76	5e-20	99.8
1164	587679239	hypothetical protein FOYG_01156 [Fusarium oxysporum FOSC 3-a]	EWZ01557.1	95.21	584	26	2	1	584	584	100	1	582	0	1125
1165	829106146	putative metallo-beta-lactamase domain protein [Fusarium fujikuroi]	KLO82820.1	97.92	289	6	0	1	289	289	100	1	289	4e-164	580
1166	342885330	hypothetical protein FOXB_04082 [Fusarium oxysporum Fo5176]	EGU85371.1	94.49	544	0	1	1	544	544	100	1	514	0	1066
1167	584144519	hypothetical protein FVEG_12157 [Fusarium verticillioides 7600]	EWG53808.1	97.66	256	6	0	1	256	256	100	1	256	4e-145	516
1168	477512519	NADH-ubiquinone oxidoreductase 40 kDa subunit, mitochondrial [Fusarium oxysporum f. sp. cubense race 1]	ENH65056.1	99.4	331	2	0	9	339	339	97.6401	43	373	0	685
1169	477512520	Putative 26S proteasome regulatory subunit rpn9 [Fusarium oxysporum f. sp. cubense race 1]	ENH65057.1	100	381	0	0	1	381	381	100	1	381	0	780
1170	584144515	glycosylphosphatidylinositol transamidase [Fusarium verticillioides 7600]	EWG53804.1	97.76	580	4	1	14	584	584	97.774	14	593	0	1155
1171	517315516	related to mouse proteinase activated receptor 2 [Fusarium fujikuroi IMI 58289]	CCT67462.1	99.63	267	1	0	1	267	267	100	1	267	3e-150	533
1172	584144512	aconitate hydratase, mitochondrial [Fusarium verticillioides 7600]	EWG53801.1	99.37	788	5	0	1	788	788	100	1	788	0	1626
1174	342885337	hypothetical protein FOXB_04089 [Fusarium oxysporum Fo5176]	EGU85378.1	98.53	204	3	0	1	204	204	100	96	299	1e-110	402
1175	584144508	hypothetical protein FVEG_12149 [Fusarium verticillioides 7600]	EWG53797.1	89.25	586	22	1	1	545	545	100	1	586	0	1013
1176	517315521	related to protein kinase C inhibitor-I [Fusarium fujikuroi IMI 58289]	CCT67467.1	95.68	139	6	0	1	139	139	100	1	139	2e-73	277
1177	342885340	hypothetical protein FOXB_04092 [Fusarium oxysporum Fo5176]	EGU85381.1	98.98	197	2	0	1	197	197	100	1	197	5e-110	399
1178	587745124	hypothetical protein FOVG_07915 [Fusarium oxysporum f. sp. pisi HDV247]	EXA42840.1	89.84	699	52	1	1	680	680	100	1	699	0	1209
1180	829130070	putative 1,3-beta-D-glucan synthase subunit [Fusarium fujikuroi]	KLP04602.1	99.54	1945	9	0	1	1945	1945	100	1	1945	0	4046
1181	475669126	Serine palmitoyltransferase 1 [Fusarium oxysporum f. sp. cubense race 4]	EMT66888.1	99.22	516	4	0	1	516	516	100	1	516	0	1061
1182	584144500	hypothetical protein FVEG_12142 [Fusarium verticillioides 7600]	EWG53789.1	97.13	348	10	0	1	348	348	100	1	348	0	650
1183	584144499	hypothetical protein FVEG_12141 [Fusarium verticillioides 7600]	EWG53788.1	85.69	531	60	1	1	515	515	100	4	534	0	912
1184	587700961	hypothetical protein FOZG_03464 [Fusarium oxysporum Fo47]	EWZ47566.1	99.04	521	5	0	1	521	521	100	1	521	0	1035
1185	584144494	hypothetical protein FVEG_12139 [Fusarium verticillioides 7600]	EWG53783.1	93.48	1073	4	3	1	1007	1043	96.5484	1	1073	0	1961
1186	829106126	putative white collar 1 protein [Fusarium fujikuroi]	KLO82800.1	97.28	1031	19	2	1	1031	1031	100	1	1022	0	1919
1187	829152678	KRE5-killer toxin-resistance protein [Fusarium fujikuroi]	KLP20340.1	94.54	1464	45	2	1	1429	1429	100	1	1464	0	2833
1188	517315532	probable COP1-coatomer complex alpha chain of secretory pathway vesicles [Fusarium fujikuroi IMI 58289]	CCT67478.1	99.59	1220	5	0	1	1220	1220	100	1	1220	0	2539
1189	584144487	26S proteasome regulatory subunit N12 [Fusarium verticillioides 7600]	EWG53776.1	90.37	270	0	1	1	244	244	100	57	326	1e-120	435
1190	584144484	hypothetical protein FVEG_12134 [Fusarium verticillioides 7600]	EWG53773.1	92.09	910	22	3	210	1072	1072	80.5037	8	914	0	1535
1191	342885353	hypothetical protein FOXB_04105 [Fusarium oxysporum Fo5176]	EGU85394.1	92.89	464	33	0	1	464	464	100	993	1456	0	874
1192	477512544	hypothetical protein FOC1_g10005932 [Fusarium oxysporum f. sp. cubense race 1]	ENH65081.1	97.13	349	10	0	1	349	349	100	1	349	0	700
1193	587700948	hypothetical protein FOZG_03455 [Fusarium oxysporum Fo47]	EWZ47553.1	91.37	371	10	1	1	349	354	98.5876	1	371	0	684
1194	584144480	hypothetical protein FVEG_17172 [Fusarium verticillioides 7600]	EWG53769.1	94.76	3263	171	0	1	3263	3263	100	1	3263	0	6375
1195	829106117	uncharacterized protein LW93_9995 [Fusarium fujikuroi]	KLO82791.1	87.27	1328	92	4	24	1300	1300	98.2308	458	1759	0	2002
1196	829133180	uncharacterized protein Y057_3068 [Fusarium fujikuroi]	KLP07147.1	97.73	308	7	0	1	308	309	99.6764	1	308	0	637
1197	587679196	hypothetical protein FOYG_01122 [Fusarium oxysporum FOSC 3-a]	EWZ01514.1	95.07	142	7	0	1	142	142	100	1	142	6e-75	281
1198	590043017	hypothetical protein FOMG_03527 [Fusarium oxysporum f. sp. melonis 26406]	EXK44875.1	94.43	323	18	0	1	323	323	100	1	323	2e-179	631
1199	584144477	hypothetical protein FVEG_12124 [Fusarium verticillioides 7600]	EWG53766.1	98.06	310	6	0	1	310	310	100	1	310	0	640
1200	587679190	gelsolin [Fusarium oxysporum FOSC 3-a]	EWZ01508.1	97.73	396	9	0	1	396	396	100	65	460	0	799
1201	477512553	Oligomeric Golgi complex subunit 5 [Fusarium oxysporum f. sp. cubense race 1]	ENH65090.1	97.72	439	10	0	1	439	439	100	1	439	0	879
1202	584144473	hypothetical protein FVEG_12121 [Fusarium verticillioides 7600]	EWG53762.1	91.05	581	7	1	1	536	536	100	1	581	0	1063
1203	584144470	hypothetical protein FVEG_12119 [Fusarium verticillioides 7600]	EWG53759.1	92.25	748	32	1	1	748	748	100	1	722	0	1268
1204	342885366	hypothetical protein FOXB_04118 [Fusarium oxysporum Fo5176]	EGU85407.1	87.55	715	64	2	1	691	691	100	1	714	0	1263
1205	342885367	hypothetical protein FOXB_04119 [Fusarium oxysporum Fo5176]	EGU85408.1	94.11	883	12	2	1	843	843	100	1	883	0	1710
1206	342885368	hypothetical protein FOXB_04120 [Fusarium oxysporum Fo5176]	EGU85409.1	98.88	268	3	0	1	268	268	100	1	268	4e-156	553
1207	584144462	hypothetical protein FVEG_12115 [Fusarium verticillioides 7600]	EWG53751.1	96.54	722	12	1	13	721	721	98.3356	13	734	0	1386
1208	829106105	uncharacterized protein LW93_9983 [Fusarium fujikuroi]	KLO82779.1	89.3	215	13	2	1	215	215	100	1	205	3e-95	350
1209	590042995	hypothetical protein FOMG_03513 [Fusarium oxysporum f. sp. melonis 26406]	EXK44853.1	94.12	697	24	1	1	680	680	100	1	697	0	1323
1210	584144459	hypothetical protein FVEG_12112 [Fusarium verticillioides 7600]	EWG53748.1	89.41	774	41	2	1	735	735	100	1	772	0	1394
1211	829106102	uncharacterized protein LW93_9980 [Fusarium fujikuroi]	KLO82776.1	67.57	222	31	3	1	206	206	100	1	197	3e-72	274
1213	584144454	hypothetical protein FVEG_12109 [Fusarium verticillioides 7600]	EWG53743.1	75.68	403	88	6	1	398	398	100	4	401	1e-166	589
1214	517315558	uncharacterized protein FFUJ_13719 [Fusarium fujikuroi IMI 58289]	CCT67559.1	100	79	0	0	1	79	79	100	1	79	2e-39	164
1215	584144452	hypothetical protein FVEG_17167 [Fusarium verticillioides 7600]	EWG53741.1	96.26	455	17	0	34	488	488	93.2377	78	532	0	921
1216	584144451	hypothetical protein FVEG_12107 [Fusarium verticillioides 7600]	EWG53740.1	97.29	221	6	0	1	221	221	100	1	221	3e-125	450
1217	584144450	hypothetical protein FVEG_12106 [Fusarium verticillioides 7600]	EWG53739.1	99.2	503	4	0	1	503	503	100	1	503	0	1023
1219	591460951	hypothetical protein FOIG_14477 [Fusarium oxysporum f. sp. cubense tropical race 4 54006]	EXL92528.1	91.69	734	29	2	1	702	702	100	78	811	0	1377
1220	342881060	hypothetical protein FOXB_07445 [Fusarium oxysporum Fo5176]	EGU82042.1	96.84	601	19	0	1	601	601	100	1	601	0	1189
1221	584144443	hypothetical protein FVEG_12101 [Fusarium verticillioides 7600]	EWG53732.1	89.16	83	0	1	1	74	74	100	1	83	3e-32	140
1223	829106088	uncharacterized protein LW93_9966 [Fusarium fujikuroi]	KLO82762.1	84.25	292	46	0	1	292	292	100	1	292	1e-143	512
1224	477512579	hypothetical protein FOC1_g10005967 [Fusarium oxysporum f. sp. cubense race 1]	ENH65116.1	81.7	306	15	1	1	265	265	100	1	306	5e-141	503
1225	584144437	hypothetical protein FVEG_12097 [Fusarium verticillioides 7600]	EWG53726.1	88.57	350	14	2	1	324	324	100	1	350	2e-168	594
1226	590042971	hypothetical protein FOMG_03491 [Fusarium oxysporum f. sp. melonis 26406]	EXK44829.1	79.67	900	72	7	1	797	797	100	1	892	0	1350
1228	829106082	uncharacterized protein LW93_9960 [Fusarium fujikuroi]	KLO82756.1	95.48	221	9	1	1	220	220	100	26	246	2e-118	427
1229	475669181	Putative CDP-alcohol phosphatidyltransferase class-I family protein C22A12.08c [Fusarium oxysporum f. sp. cubense race 4]	EMT66943.1	96.36	494	3	1	1	479	479	100	1	494	0	979
1230	342873197	hypothetical protein FOXB_14075 [Fusarium oxysporum Fo5176]	EGU75415.1	99.09	329	3	0	1	329	329	100	1	329	0	678
1231	342873196	hypothetical protein FOXB_14074 [Fusarium oxysporum Fo5176]	EGU75414.1	90.22	644	27	2	1	608	608	100	409	1052	0	1194
1232	587679142	nitrate reductase (NADH) [Fusarium oxysporum FOSC 3-a]	EWZ01460.1	93.93	346	21	0	1	346	347	99.7118	1	346	0	638
1233	829106078	putative endoglucanase IV [Fusarium fujikuroi]	KLO82752.1	94.33	353	20	0	1	353	354	99.7175	1	353	2e-177	625
1234	342873194	hypothetical protein FOXB_14072 [Fusarium oxysporum Fo5176]	EGU75412.1	92.53	241	18	0	1	241	241	100	542	782	2e-132	474
1235	587679138	hypothetical protein FOYG_01079 [Fusarium oxysporum FOSC 3-a]	EWZ01456.1	80.93	535	100	2	1	533	533	100	1	535	0	883
1238	590042960	hypothetical protein FOMG_03481 [Fusarium oxysporum f. sp. melonis 26406]	EXK44818.1	94.39	553	27	2	1	551	551	100	1	551	0	1017
1240	584144418	hypothetical protein FVEG_12081 [Fusarium verticillioides 7600]	EWG53707.1	96.58	527	18	0	1	527	527	100	1	527	0	1043
1241	342872184	hypothetical protein FOXB_14898 [Fusarium oxysporum Fo5176]	EGU74577.1	84.83	402	35	2	1	376	376	100	1	402	0	699
1242	587679134	hypothetical protein FOYG_01074 [Fusarium oxysporum FOSC 3-a]	EWZ01452.1	89.81	157	16	0	1	157	157	100	1	157	4e-78	292
1243	587679133	hypothetical protein FOYG_01073 [Fusarium oxysporum FOSC 3-a]	EWZ01451.1	89.86	641	63	2	1	639	639	100	1	641	0	1095
1244	584144414	hypothetical protein FVEG_12077 [Fusarium verticillioides 7600]	EWG53703.1	89.44	142	15	0	1	142	142	100	1	142	3e-69	263
1245	584144413	hypothetical protein FVEG_12076 [Fusarium verticillioides 7600]	EWG53702.1	79.29	367	26	1	1	317	317	100	1	367	2e-167	592
1246	517315586	uncharacterized protein FFUJ_14523 [Fusarium fujikuroi IMI 58289]	CCT67590.1	85.88	524	54	2	1	513	513	100	1	515	0	890
1247	591460981	hypothetical protein FOIG_14505 [Fusarium oxysporum f. sp. cubense tropical race 4 54006]	EXL92558.1	94.75	419	20	1	1	419	419	100	1	417	0	835
1248	829106068	uncharacterized protein LW93_9946 [Fusarium fujikuroi]	KLO82742.1	94.1	288	17	0	1	288	288	100	1	288	5e-159	563
1250	584144405	hypothetical protein FVEG_12071 [Fusarium verticillioides 7600]	EWG53694.1	95.29	276	13	0	27	302	302	91.3907	58	333	2e-143	511
1251	829106062	uncharacterized protein LW93_9940 [Fusarium fujikuroi]	KLO82736.1	69.32	453	128	7	4	453	456	98.6842	2	446	6e-176	620
1252	584144404	hypothetical protein FVEG_12070 [Fusarium verticillioides 7600]	EWG53693.1	98.65	148	2	0	1	148	148	100	1	148	2e-78	293
1253	517315594	phosphate transport protein [Fusarium fujikuroi IMI 58289]	CCT67595.1	99.65	567	2	0	1	567	567	100	1	567	0	1164
1254	342872199	hypothetical protein FOXB_14913 [Fusarium oxysporum Fo5176]	EGU74592.1	95.58	226	10	0	1	226	226	100	1	226	5e-124	446
1256	584144401	hypothetical protein FVEG_12067 [Fusarium verticillioides 7600]	EWG53690.1	82.62	328	8	1	1	279	279	100	1	328	7e-152	539
1257	584144398	hypothetical protein FVEG_12066 [Fusarium verticillioides 7600]	EWG53687.1	96.17	836	14	2	1	820	820	100	1	834	0	1618
1258	517315598	probable bifunctional D12/D15 fatty acid desaturase [Fusarium fujikuroi IMI 58289]	CCT67599.1	92.29	402	3	1	1	374	374	100	1	402	0	753
1259	587745247	hypothetical protein FOVG_08008 [Fusarium oxysporum f. sp. pisi HDV247]	EXA42963.1	87.34	616	62	3	1	602	602	100	1	614	0	1116
1260	517315600	related to arylamine N-acetyltransferase 2 [Fusarium fujikuroi IMI 58289]	CCT67600.1	93.23	325	22	0	1	325	325	100	1	325	1e-175	619
1261	591405822	hypothetical protein FOCG_16355 [Fusarium oxysporum f. sp. radicis-lycopersici 26381]	EXL40959.1	87.96	324	27	1	1	312	313	99.6805	1	324	2e-169	598
1262	829133116	uncharacterized protein Y057_3004 [Fusarium fujikuroi]	KLP07083.1	97.67	816	19	0	10	825	826	98.7893	115	930	0	1643
1263	591491454	hypothetical protein FOTG_10938 [Fusarium oxysporum f. sp. vasinfectum 25433]	EXM21082.1	83.53	340	16	1	1	300	300	100	1	340	3e-160	567
1264	587679093	hypothetical protein FOYG_01047 [Fusarium oxysporum FOSC 3-a]	EWZ01411.1	98.14	430	8	0	1	430	430	100	125	554	0	867
1265	590042913	proline dehydrogenase [Fusarium oxysporum f. sp. melonis 26406]	EXK44771.1	94.78	441	23	0	1	441	441	100	1	441	0	884
1266	829147096	uncharacterized protein LW94_958 [Fusarium fujikuroi]	KLP17076.1	75.67	818	181	3	104	905	905	88.6188	1	816	0	1266
1268	584144385	hypothetical protein FVEG_12054 [Fusarium verticillioides 7600]	EWG53674.1	98.05	205	4	0	1	205	205	100	1	205	6e-118	426
1269	517315610	related to chitinase [Fusarium fujikuroi IMI 58289]	CCT67606.1	97.91	191	4	0	1	191	191	100	104	294	5e-109	396
1270	591445407	hypothetical protein FOPG_07812 [Fusarium oxysporum f. sp. conglutinans race 2 54008]	EXL77909.1	96.05	532	21	0	1	532	532	100	1	532	0	1067
1271	475669223	hypothetical protein FOC4_g10003524 [Fusarium oxysporum f. sp. cubense race 4]	EMT66985.1	93.49	461	30	0	1	461	464	99.3534	1	461	0	903
1273	517315615	uncharacterized protein FFUJ_14552 [Fusarium fujikuroi IMI 58289]	CCT67608.1	96.49	228	8	0	1	228	228	100	1	228	4e-119	430
1274	475669226	Zinc-regulated transporter 1 [Fusarium oxysporum f. sp. cubense race 4]	EMT66988.1	84.36	569	33	3	1	524	524	100	1	558	0	967
1275	517315617	related to 1-acyldihydroxyacetone-phosphate reductase [Fusarium fujikuroi IMI 58289]	CCT67610.1	99.32	296	2	0	1	296	296	100	1	296	3e-172	607
1276	591405843	hypothetical protein FOCG_16371 [Fusarium oxysporum f. sp. radicis-lycopersici 26381]	EXL40980.1	93.9	295	15	2	1	295	295	100	1	292	6e-109	397
1277	591460066	hypothetical protein FOIG_15204 [Fusarium oxysporum f. sp. cubense tropical race 4 54006]	EXL91670.1	86.44	944	17	3	1	833	833	100	6	949	0	1641
1279	584144368	hypothetical protein FVEG_17156 [Fusarium verticillioides 7600]	EWG53657.1	87.5	120	15	0	1	120	120	100	70	189	3e-51	203
1284	584144367	hypothetical protein FVEG_12042 [Fusarium verticillioides 7600]	EWG53656.1	99.24	523	4	0	1	523	523	100	1	523	0	1068
1285	590042887	hypothetical protein FOMG_03430 [Fusarium oxysporum f. sp. melonis 26406]	EXK44745.1	97.92	578	10	1	1	576	576	100	1	578	0	1168
1286	829106033	Uncharacterized protein LW93_9911 [Fusarium fujikuroi]	KLO82707.1	85.17	971	97	6	1	940	940	100	1	955	0	1604
1288	342880871	hypothetical protein FOXB_07593 [Fusarium oxysporum Fo5176]	EGU81888.1	88.14	177	21	0	14	190	190	93.1579	853	1029	2e-88	327
1289	587745289	hypothetical protein FOVG_08039 [Fusarium oxysporum f. sp. pisi HDV247]	EXA43005.1	86.25	80	11	0	1	80	80	100	11	90	7e-33	142
1291	584144358	hypothetical protein FVEG_12036 [Fusarium verticillioides 7600]	EWG53647.1	97.74	177	4	0	1	177	177	100	1	177	4e-100	366
1292	584144356	hypothetical protein FVEG_17153 [Fusarium verticillioides 7600]	EWG53645.1	94.43	1077	12	2	1	1029	1030	99.9029	1	1077	0	1991
1293	829133091	uncharacterized protein Y057_2979 [Fusarium fujikuroi]	KLP07058.1	97.41	965	25	0	1	965	965	100	1	965	0	1791
1294	584144354	esterase/lipase [Fusarium verticillioides 7600]	EWG53643.1	98.8	251	3	0	1	251	251	100	1	251	1e-144	515
1295	587700808	hypothetical protein FOZG_03346 [Fusarium oxysporum Fo47]	EWZ47413.1	91.2	284	14	1	1	273	273	100	1	284	1e-139	498
1296	587679051	hypothetical protein FOYG_01013 [Fusarium oxysporum FOSC 3-a]	EWZ01369.1	98.75	561	7	0	1	561	561	100	1	561	0	1135
1298	591460046	hypothetical protein FOIG_15186 [Fusarium oxysporum f. sp. cubense tropical race 4 54006]	EXL91650.1	92.87	449	30	1	1	449	449	100	1	447	0	833
1299	475669251	Protein priB [Fusarium oxysporum f. sp. cubense race 4]	EMT67013.1	94.46	686	38	0	1	686	686	100	1	686	0	1340
1301	829133082	uncharacterized protein Y057_2970 [Fusarium fujikuroi]	KLP07049.1	82.05	117	6	2	1	103	117	88.0342	1	116	1e-23	112
1302	829133081	uncharacterized protein Y057_2969 [Fusarium fujikuroi]	KLP07048.1	84.08	289	25	1	1	268	268	100	75	363	2e-140	501
1303	475669254	hypothetical protein FOC4_g10003557 [Fusarium oxysporum f. sp. cubense race 4]	EMT67016.1	90.62	96	9	0	1	96	97	98.9691	107	202	2e-39	164
1304	584144344	hypothetical protein FVEG_17150 [Fusarium verticillioides 7600]	EWG53633.1	89.43	369	39	0	1	369	370	99.7297	1	369	0	676
1305	477512656	Lysine biosynthesis regulatory protein LYS14 [Fusarium oxysporum f. sp. cubense race 1]	ENH65193.1	92.96	412	29	0	3	414	427	96.4871	56	467	0	754
1306	584144342	agmatinase 1 [Fusarium verticillioides 7600]	EWG53631.1	95.21	397	3	1	1	381	381	100	1	397	0	768
1307	584144341	hypothetical protein FVEG_12023 [Fusarium verticillioides 7600]	EWG53630.1	96.12	490	9	1	1	480	480	100	1	490	0	948
1308	342877312	hypothetical protein FOXB_10712 [Fusarium oxysporum Fo5176]	EGU78786.1	92.72	522	9	1	1	493	493	100	1	522	0	960
1309	591460035	hypothetical protein FOIG_15176 [Fusarium oxysporum f. sp. cubense tropical race 4 54006]	EXL91639.1	82.89	228	39	0	1	228	237	96.2025	1	228	3e-106	387
1310	587745315	hypothetical protein FOVG_08064 [Fusarium oxysporum f. sp. pisi HDV247]	EXA43031.1	72.09	713	177	3	1	691	692	99.8555	1	713	0	1007
1311	829133072	uncharacterized protein Y057_2960 [Fusarium fujikuroi]	KLP07039.1	86.63	202	23	1	1	198	198	100	1	202	9e-93	342
1312	587700786	hypothetical protein FOZG_03325 [Fusarium oxysporum Fo47]	EWZ47391.1	83.75	283	33	1	1	270	270	100	1	283	5e-133	476
1313	587745318	hypothetical protein FOVG_08067 [Fusarium oxysporum f. sp. pisi HDV247]	EXA43034.1	97.64	1061	25	0	1	1061	1061	100	1	1061	0	2150
1314	475669268	Siderophore iron transporter 1 [Fusarium oxysporum f. sp. cubense race 4]	EMT67030.1	91.92	582	7	1	1	542	543	99.8158	1	582	0	1069
1315	475669269	hypothetical protein FOC4_g10003573 [Fusarium oxysporum f. sp. cubense race 4]	EMT67031.1	95.74	446	19	0	1	446	452	98.6726	1	446	0	884
1316	590042851	hypothetical protein FOMG_03396 [Fusarium oxysporum f. sp. melonis 26406]	EXK44709.1	71.43	168	44	1	1	168	169	99.4083	1	164	5e-49	196
1317	517315654	uncharacterized protein FFUJ_14591 [Fusarium fujikuroi IMI 58289]	CCT67636.1	97.25	363	10	0	1	363	363	100	1	363	0	730
1318	475669272	hypothetical protein FOC4_g10003577 [Fusarium oxysporum f. sp. cubense race 4]	EMT67034.1	98.67	375	5	0	1	375	375	100	1	375	0	775
1320	517315657	uncharacterized protein FFUJ_14594 [Fusarium fujikuroi IMI 58289]	CCT67851.1	72.12	520	87	6	33	546	556	92.446	2	469	0	740
1321	477515479	5',5'''-P-1,P-4-tetraphosphate phosphorylase 2 [Fusarium oxysporum f. sp. cubense race 1]	ENH67811.1	73.29	292	53	1	1	267	267	100	1	292	5e-124	447
1322	584144329	hypothetical protein FVEG_12013 [Fusarium verticillioides 7600]	EWG53618.1	94.77	478	25	0	1	478	478	100	1	478	0	945
1323	584144328	hypothetical protein FVEG_12012 [Fusarium verticillioides 7600]	EWG53617.1	95.71	210	9	0	1	210	210	100	1	210	6e-119	429
1324	517315662	related to protein kinase [Fusarium fujikuroi IMI 58289]	CCT67946.1	85.82	388	55	0	1	388	402	96.5174	1	388	0	694
1325	517315663	related to protein kinase [Fusarium fujikuroi IMI 58289]	CCT67640.1	95.93	836	15	2	1	817	817	100	1	836	0	1642
1326	584144325	hypothetical protein FVEG_12009 [Fusarium verticillioides 7600]	EWG53614.1	88.65	1533	125	1	1	1484	1484	100	1	1533	0	2701
1327	477515484	Prostaglandin reductase 1 [Fusarium oxysporum f. sp. cubense race 1]	ENH67816.1	96.13	336	13	0	1	336	339	99.115	1	336	0	668
1331	584144321	hypothetical protein FVEG_12006 [Fusarium verticillioides 7600]	EWG53610.1	98.85	609	7	0	1	609	609	100	1	609	0	1249
1332	587700764	hypothetical protein FOZG_03305 [Fusarium oxysporum Fo47]	EWZ47369.1	79.31	87	18	0	1	87	87	100	146	232	9e-34	145
1333	591485626	hypothetical protein FOTG_16174 [Fusarium oxysporum f. sp. vasinfectum 25433]	EXM15503.1	70.15	536	158	1	1	536	541	99.0758	1	534	0	771
1334	584144318	hypothetical protein FVEG_12003 [Fusarium verticillioides 7600]	EWG53607.1	98.82	255	3	0	1	255	255	100	1	255	7e-148	526
1335	517315671	uncharacterized protein FFUJ_14608 [Fusarium fujikuroi IMI 58289]	CCT67856.1	75.48	469	115	0	1	469	473	99.1543	1	469	0	714
1342	591485629	hypothetical protein FOTG_16177 [Fusarium oxysporum f. sp. vasinfectum 25433]	EXM15506.1	71.35	192	40	2	1	177	177	100	373	564	3e-70	267
1343	517315673	related to ADH5-alcohol dehydrogenase V [Fusarium fujikuroi IMI 58289]	CCT67644.1	97.77	358	8	0	1	358	365	98.0822	1	358	0	720
1347	584144311	hypothetical protein FVEG_11997 [Fusarium verticillioides 7600]	EWG53600.1	89.26	242	22	1	1	238	238	100	61	302	9e-113	409
1348	517315677	related to cis-1,2-dihydro-1,2-dihydroxynaphthalene dehydrogenase [Fusarium fujikuroi IMI 58289]	CCT67647.1	93.8	258	16	0	1	258	258	100	1	258	2e-141	504
1349	517315678	probable cutinase transcription factor 1 beta [Fusarium fujikuroi IMI 58289]	CCT67648.1	98.53	681	10	0	1	681	681	100	1	681	0	1388
1350	342870806	hypothetical protein FOXB_15736 [Fusarium oxysporum Fo5176]	EGU73754.1	94.3	316	18	0	1	316	316	100	220	535	0	637
1351	751349370	hypothetical protein FAVG1_09646 [Fusarium avenaceum]	KIL87092.1	64.63	147	50	1	1	147	150	98	1	145	1e-43	178
1352	591490288	hypothetical protein FOTG_12182 [Fusarium oxysporum f. sp. vasinfectum 25433]	EXM19953.1	71.19	1090	190	7	1	968	976	99.1803	1	1088	0	1505
1353	902728693	oxidoreductase [Fusarium oxysporum f. sp. lycopersici 4287]	KNB00262.1	92.82	543	22	1	1	526	526	100	1	543	0	1018
1354	584144302	hypothetical protein FVEG_11990 [Fusarium verticillioides 7600]	EWG53591.1	96.13	181	7	0	1	181	181	100	1	181	2e-98	360
1355	902728695	hypothetical protein FOXG_03875 [Fusarium oxysporum f. sp. lycopersici 4287]	KNB00264.1	96.99	532	16	0	1	532	532	100	1	532	0	1044
1357	829117549	uncharacterized protein Y057_14410 [Fusarium fujikuroi]	KLO93824.1	74.74	483	84	3	1	458	459	99.7821	1	470	0	641
1358	927752883	phloretin hydrolase protein [Fusarium langsethiae]	KPA36987.1	88.56	306	35	0	1	306	306	100	1	306	3e-166	587
1359	517315687	uncharacterized protein FFUJ_14624 [Fusarium fujikuroi IMI 58289]	CCT67861.1	62.74	1503	477	13	16	1459	1459	98.9719	17	1495	0	1761
1360	829105971	uncharacterized protein LW93_9849 [Fusarium fujikuroi]	KLO82645.1	95.18	249	12	0	1	249	249	100	1	249	3e-138	494
1361	584144298	hypothetical protein FVEG_11986 [Fusarium verticillioides 7600]	EWG53587.1	94.92	295	15	0	1	295	297	99.3266	29	323	1e-161	572
1362	829105969	uncharacterized protein LW93_9847 [Fusarium fujikuroi]	KLO82643.1	85.27	129	19	0	1	129	129	100	1	129	1e-59	231
1363	902728702	hypothetical protein FOXG_03881 [Fusarium oxysporum f. sp. lycopersici 4287]	KNB00271.1	78.47	692	149	0	2	693	693	99.8557	59	750	0	1113
1364	587678981	hypothetical protein FOYG_00957 [Fusarium oxysporum FOSC 3-a]	EWZ01299.1	96.48	483	17	0	1	483	483	100	1	483	0	961
1365	591460828	hypothetical protein FOIG_14612 [Fusarium oxysporum f. sp. cubense tropical race 4 54006]	EXL92412.1	87.92	472	34	2	1	449	449	100	1	472	0	848
1366	517315695	related to monocarboxylate transporter 2 [Fusarium fujikuroi IMI 58289]	CCT67661.1	99.1	443	4	0	1	443	443	100	1	443	0	873
1367	591490272	hypothetical protein FOTG_12167 [Fusarium oxysporum f. sp. vasinfectum 25433]	EXM19937.1	64.26	263	89	2	3	260	271	95.203	185	447	5e-88	327
1368	584144295	hypothetical protein FVEG_11983 [Fusarium verticillioides 7600]	EWG53584.1	95.5	378	17	0	1	378	378	100	1	378	0	750
1369	517315697	related to POX1-acyl-CoA oxidase [Fusarium fujikuroi IMI 58289]	CCT67939.1	99	698	7	0	1	698	698	100	1	698	0	1443
1370	829117535	putative glutathione S-transferase [Fusarium fujikuroi]	KLO93810.1	90.61	245	21	1	1	243	244	99.5902	1	245	9e-129	462
1371	584144292	alcohol dehydrogenase [Fusarium verticillioides 7600]	EWG53581.1	75.14	346	13	4	1	273	273	100	1	346	3e-138	494
1372	591490266	hypothetical protein FOTG_12161 [Fusarium oxysporum f. sp. vasinfectum 25433]	EXM19931.1	69.72	492	37	5	1	380	380	100	1	492	0	647
1373	517315703	uncharacterized protein FFUJ_14640 [Fusarium fujikuroi IMI 58289]	CCT67864.1	90.51	158	15	0	1	158	158	100	1	158	5e-78	292
1374	517315704	uncharacterized protein FFUJ_14641 [Fusarium fujikuroi IMI 58289]	CCT67664.1	97.1	276	7	1	1	276	276	100	14	288	9e-158	559
1375	584144289	hypothetical protein FVEG_11977 [Fusarium verticillioides 7600]	EWG53578.1	82.77	354	61	0	1	354	354	100	1	354	4e-175	617
1376	517315706	uncharacterized protein FFUJ_14643 [Fusarium fujikuroi IMI 58289]	CCT67865.1	71.65	127	36	0	1	127	127	100	458	584	2e-44	181
1377	902728718	hypothetical protein FOXG_03894 [Fusarium oxysporum f. sp. lycopersici 4287]	KNB00287.1	61.98	263	80	3	1	246	247	99.5951	2	261	2e-81	305
1378	829105955	uncharacterized protein LW93_9833 [Fusarium fujikuroi]	KLO82629.1	92.11	304	24	0	1	304	304	100	1	304	9e-168	592
1379	591490261	hypothetical protein FOTG_12156 [Fusarium oxysporum f. sp. vasinfectum 25433]	EXM19926.1	83.36	1196	199	0	1	1196	1196	100	1	1196	0	2014
1380	591437495	hypothetical protein FOPG_13894 [Fusarium oxysporum f. sp. conglutinans race 2 54008]	EXL70287.1	70.1	592	112	3	1	527	527	100	1	592	0	837
1381	584144283	hypothetical protein FVEG_11974 [Fusarium verticillioides 7600]	EWG53572.1	96.36	357	13	0	1	357	357	100	1	357	0	719
1382	584144282	aldehyde dehydrogenase (NAD+) [Fusarium verticillioides 7600]	EWG53571.1	99.6	501	2	0	1	501	501	100	1	501	0	1026
1383	517315712	related to HNM1-choline permease [Fusarium fujikuroi IMI 58289]	CCT67669.1	98.2	555	10	0	1	555	555	100	1	555	0	1102
1384	584144280	primary-amine oxidase [Fusarium verticillioides 7600]	EWG53569.1	93.73	702	9	1	1	667	667	100	1	702	0	1368
1385	587745387	hypothetical protein FOVG_08132 [Fusarium oxysporum f. sp. pisi HDV247]	EXA43103.1	69.78	536	94	7	1	469	469	100	1	535	0	733
1386	829105947	15-hydroxyprostaglandin dehydrogenase [Fusarium fujikuroi]	KLO82621.1	92.01	313	8	1	1	296	296	100	1	313	4e-165	583
1387	517315716	uncharacterized protein FFUJ_14653 [Fusarium fujikuroi IMI 58289]	CCT67673.1	90.21	562	39	3	49	596	596	91.9463	36	595	0	1040
1388	584144276	hypothetical protein FVEG_11967 [Fusarium verticillioides 7600]	EWG53565.1	96.35	274	10	0	1	274	274	100	1	274	1e-152	542
1389	587745391	hypothetical protein FOVG_08136 [Fusarium oxysporum f. sp. pisi HDV247]	EXA43107.1	95.63	1350	52	1	1	1350	1350	100	1	1343	0	2155
1390	829117515	cholin permease [Fusarium fujikuroi]	KLO93790.1	99.62	527	2	0	1	527	527	100	1	527	0	1055
1391	584144272	hypothetical protein FVEG_11964 [Fusarium verticillioides 7600]	EWG53561.1	99.66	290	1	0	1	290	331	87.6133	1	290	3e-170	601
1392	517315721	probable putative protein [Fusarium fujikuroi IMI 58289]	CCT67678.1	62.32	69	0	1	1	43	43	100	1	69	5e-12	73.2
1393	584144271	hypothetical protein FVEG_11963 [Fusarium verticillioides 7600]	EWG53560.1	94.08	321	14	1	1	316	316	100	1	321	3e-175	617
1394	517315723	related to 3-oxoacyl-[acyl-carrier-protein] reductase [Fusarium fujikuroi IMI 58289]	CCT67680.1	94.09	254	15	0	1	254	254	100	1	254	8e-134	479
1395	342871808	hypothetical protein FOXB_15226 [Fusarium oxysporum Fo5176]	EGU74263.1	96.02	176	7	0	1	176	176	100	1	176	6e-98	358
1396	902728740	hypothetical protein FOXG_03911 [Fusarium oxysporum f. sp. lycopersici 4287]	KNB00309.1	64.98	494	97	4	1	425	426	99.7653	1	487	2e-177	625
1397	584144264	hypothetical protein FVEG_11959 [Fusarium verticillioides 7600]	EWG53553.1	83.53	85	14	0	1	85	104	81.7308	1	85	2e-35	150
1398	517315727	related to C4-dicarboxylate transport protein mae1 [Fusarium fujikuroi IMI 58289]	CCT67682.1	99.54	438	2	0	1	438	438	100	1	438	0	897
1399	590051878	hypothetical protein FOQG_16004 [Fusarium oxysporum f. sp. raphani 54005]	EXK79402.1	94.19	310	18	0	1	310	310	100	1	310	2e-174	614
1400	587700700	sulfite oxidase [Fusarium oxysporum Fo47]	EWZ47305.1	98.21	560	10	0	1	560	560	100	1	560	0	1146
1401	477515547	Peroxisomal catalase, partial [Fusarium oxysporum f. sp. cubense race 1]	ENH67879.1	95.48	487	16	1	3	483	483	99.5859	1	487	0	969
1402	584144257	hypothetical protein FVEG_11954 [Fusarium verticillioides 7600]	EWG53546.1	87.63	493	61	0	1	493	493	100	26	518	0	872
1403	584144256	hypothetical protein FVEG_11953 [Fusarium verticillioides 7600]	EWG53545.1	94.08	287	17	0	1	287	287	100	1	287	2e-161	571
1404	829117501	uncharacterized protein Y057_14362 [Fusarium fujikuroi]	KLO93776.1	96.59	1436	49	0	1	1436	1436	100	1	1436	0	2832
1405	829105929	maltose permease (MalP) [Fusarium fujikuroi]	KLO82603.1	98.6	573	8	0	1	573	573	100	1	573	0	1154
1406	587700694	hypothetical protein FOZG_03240 [Fusarium oxysporum Fo47]	EWZ47299.1	91.92	656	50	1	1	656	656	100	1	653	0	1242
1407	475669352	Putative transcription factor SEF1, partial [Fusarium oxysporum f. sp. cubense race 4]	EMT67114.1	96.67	421	14	0	1	421	428	98.3645	1	421	0	830
1408	829105926	nucleoside-diphosphate-sugar epimerase [Fusarium fujikuroi]	KLO82600.1	93.11	305	21	0	1	305	305	100	1	305	3e-169	597
1409	587745412	L-ascorbate oxidase [Fusarium oxysporum f. sp. pisi HDV247]	EXA43128.1	92.51	601	23	2	1	579	579	100	1	601	0	1127
1418	591490227	hypothetical protein FOTG_12125 [Fusarium oxysporum f. sp. vasinfectum 25433]	EXM19892.1	91.78	438	24	1	1	426	427	99.7658	1	438	0	786
1419	751348632	hypothetical protein FAVG1_10183 [Fusarium avenaceum]	KIL86354.1	92.5	80	6	0	2	81	82	97.561	226	305	3e-37	156
1420	587731192	hypothetical protein FOVG_19516 [Fusarium oxysporum f. sp. pisi HDV247]	EXA28908.1	76.15	327	27	2	1	276	276	100	1	327	3e-139	497
1421	751348635	hypothetical protein FAVG1_10186 [Fusarium avenaceum]	KIL86357.1	70.45	335	32	3	1	268	270	99.2593	1	335	2e-124	448
1422	591460773	hypothetical protein FOIG_14564 [Fusarium oxysporum f. sp. cubense tropical race 4 54006]	EXL92357.1	89.12	340	37	0	1	340	340	100	1	340	2e-180	635
1423	342881483	hypothetical protein FOXB_07096 [Fusarium oxysporum Fo5176]	EGU82375.1	87.56	402	50	0	1	402	402	100	1	402	0	721
1424	342881484	hypothetical protein FOXB_07097 [Fusarium oxysporum Fo5176]	EGU82376.1	87.41	286	12	2	1	262	262	100	1	286	2e-141	504
1425	590042745	hypothetical protein FOMG_03299 [Fusarium oxysporum f. sp. melonis 26406]	EXK44603.1	90.8	326	30	0	1	326	326	100	1	326	1e-175	619
1426	902728768	hypothetical protein FOXG_18689 [Fusarium oxysporum f. sp. lycopersici 4287]	KNB00337.1	88.3	282	33	0	1	282	283	99.6466	1	282	8e-148	526
1428	829105918	uncharacterized protein LW93_9796 [Fusarium fujikuroi]	KLO82592.1	81.73	427	74	2	1	424	424	100	1	426	0	734
1429	475669368	Aliphatic nitrilase [Fusarium oxysporum f. sp. cubense race 4]	EMT67130.1	95.91	342	2	1	1	330	330	100	1	342	0	677
1430	477515568	hypothetical protein FOC1_g10005326 [Fusarium oxysporum f. sp. cubense race 1]	ENH67900.1	98.09	367	7	0	1	367	367	100	1	367	0	748
1431	517315749	related to monooxigenase [Fusarium fujikuroi IMI 58289]	CCT67697.1	90.73	572	24	1	1	543	543	100	1	572	0	1072
1432	829105914	Uncharacterized protein LW93_9792 [Fusarium fujikuroi]	KLO82588.1	90.23	430	34	1	1	422	422	100	1	430	0	792
1434	829105911	uncharacterized protein LW93_9789 [Fusarium fujikuroi]	KLO82585.1	84.5	929	127	1	1	912	912	100	1	929	0	1613
1435	584144231	hypothetical protein FVEG_17133 [Fusarium verticillioides 7600]	EWG53520.1	92.51	454	33	1	1	454	454	100	1	453	0	865
1436	591460756	hypothetical protein FOIG_14550 [Fusarium oxysporum f. sp. cubense tropical race 4 54006]	EXL92340.1	91.71	398	33	0	1	398	398	100	1	398	0	765
1437	829105908	multidrug resistance protein fnx1 [Fusarium fujikuroi]	KLO82582.1	94.41	429	24	0	1	429	431	99.536	1	429	0	815
1438	591490206	beta-fructofuranosidase [Fusarium oxysporum f. sp. vasinfectum 25433]	EXM19871.1	98.35	546	9	0	1	546	546	100	1	546	0	1105
1439	957801382	putative polyketide synthase [Fusarium sp. NRRL 52700]	ALQ32990.1	91.4	4091	188	9	1	3927	3927	100	1	4091	0	7577
1440	829105905	toxD protein [Fusarium fujikuroi]	KLO82579.1	95.24	357	2	1	1	342	342	100	1	357	0	684
1441	475669385	Putative HC-toxin efflux carrier TOXA [Fusarium oxysporum f. sp. cubense race 4]	EMT67147.1	97.88	566	12	0	1	566	566	100	1	566	0	1043
1442	591490202	hypothetical protein FOTG_12102 [Fusarium oxysporum f. sp. vasinfectum 25433]	EXM19867.1	98.67	526	7	0	1	526	526	100	1	526	0	1085
1443	475669388	hypothetical protein FOC4_g10003696 [Fusarium oxysporum f. sp. cubense race 4]	EMT67150.1	98.13	321	6	0	1	321	321	100	1	321	0	662
1444	587678902	hypothetical protein FOYG_00887 [Fusarium oxysporum FOSC 3-a]	EWZ01220.1	68.34	559	172	4	5	562	563	99.1119	7	561	0	780
1445	342878705	hypothetical protein FOXB_09474 [Fusarium oxysporum Fo5176]	EGU80011.1	80.2	409	59	1	19	405	406	95.3202	371	779	0	660
1446	584144218	hypothetical protein FVEG_17131 [Fusarium verticillioides 7600]	EWG53507.1	86.29	299	39	2	6	302	303	98.0198	1	299	3e-146	521
1447	591406016	hypothetical protein FOCG_16525 [Fusarium oxysporum f. sp. radicis-lycopersici 26381]	EXL41153.1	80.04	501	65	1	35	500	500	93.2	1	501	0	829
1448	517315767	related to Zn-dependent hydrolases of the beta-lactamase fold, putative [Fusarium fujikuroi IMI 58289]	CCT67710.1	72.76	279	48	2	1	251	251	100	1	279	1e-114	416
1449	517315778	related to ethylene-forming enzyme [Fusarium fujikuroi IMI 58289]	CCT67881.1	94.96	377	15	1	25	401	401	94.015	1	373	0	739
1450	584144206	hypothetical protein FVEG_11914 [Fusarium verticillioides 7600]	EWG53495.1	88.89	459	51	0	13	471	474	96.8354	358	816	0	867
1451	829105885	ariadne-2 protein [Fusarium fujikuroi]	KLO82559.1	84.65	254	37	1	46	299	305	83.2787	119	370	6e-124	447
1452	584144205	hypothetical protein FVEG_11913 [Fusarium verticillioides 7600]	EWG53494.1	98.78	493	6	0	2	494	494	99.7976	3	495	0	1000
1453	829105883	endothelin-converting enzyme 1 [Fusarium fujikuroi]	KLO82557.1	75.47	738	113	2	1	670	670	100	1	738	0	1139
1454	584144203	hypothetical protein FVEG_11911 [Fusarium verticillioides 7600]	EWG53492.1	96.59	205	7	0	1	205	205	100	1	205	2e-114	414
1456	829105887	uncharacterized protein LW93_9765 [Fusarium fujikuroi]	KLO82561.1	75.6	336	62	4	9	342	345	96.8116	1	318	4e-136	487
1457	517315776	uncharacterized protein FFUJ_14713 [Fusarium fujikuroi IMI 58289]	CCT67718.1	94.68	188	8	1	1	186	211	88.1517	1	188	4e-98	360
1458	829105889	uncharacterized protein LW93_9767 [Fusarium fujikuroi]	KLO82563.1	98.01	403	8	0	1	403	403	100	1	403	0	794
1459	517315785	uncharacterized protein FFUJ_14722 [Fusarium fujikuroi IMI 58289]	CCT67885.1	82.22	135	22	2	7	141	141	95.7447	10	142	3e-52	206
1460	517315786	related to integral membrane protein PTH11 [Fusarium fujikuroi IMI 58289]	CCT67723.1	95.99	299	12	0	1	299	300	99.6667	1	299	6e-167	590
1462	584144192	hypothetical protein FVEG_11905 [Fusarium verticillioides 7600]	EWG53481.1	92.55	537	40	0	1	537	537	100	1	537	0	1050
1463	587678870	hypothetical protein FOYG_00861 [Fusarium oxysporum FOSC 3-a]	EWZ01188.1	83.28	311	43	1	1	302	302	100	1	311	1e-132	476
1464	829143351	uncharacterized protein LW94_12429 [Fusarium fujikuroi]	KLP14727.1	80.82	73	14	0	1	73	73	100	1	73	8e-27	122
1465	584144189	hypothetical protein FVEG_11903 [Fusarium verticillioides 7600]	EWG53478.1	92.97	256	18	0	1	256	257	99.6109	1	256	1e-137	492
1466	475669413	hypothetical protein FOC4_g10003723 [Fusarium oxysporum f. sp. cubense race 4]	EMT67175.1	98.67	75	1	0	1	75	75	100	1	75	6e-35	149
1467	517315794	uncharacterized protein FFUJ_14731 [Fusarium fujikuroi IMI 58289]	CCT67728.1	93.73	510	15	1	1	493	496	99.3952	269	778	0	992
1468	584144186	hypothetical protein FVEG_11902 [Fusarium verticillioides 7600]	EWG53475.1	95.77	213	9	0	1	213	215	99.0698	42	254	2e-119	431
1469	584144185	hypothetical protein FVEG_11901 [Fusarium verticillioides 7600]	EWG53474.1	90.57	456	27	1	25	464	464	94.8276	149	604	0	837
1470	584144185	hypothetical protein FVEG_11901 [Fusarium verticillioides 7600]	EWG53474.1	97.33	75	2	0	3	77	79	94.9367	31	105	2e-36	154
1471	517315796	related to HAD superfamily hydrolase [Fusarium fujikuroi IMI 58289]	CCT67730.1	88.45	251	29	0	1	251	251	100	1	251	4e-131	470
1472	829105867	tetracycline resistance protein [Fusarium fujikuroi]	KLO82541.1	89.08	458	24	1	1	432	436	99.0826	1	458	0	820
1473	517315798	probable alanine-glyoxylate aminotransferase AGT2 [Fusarium fujikuroi IMI 58289]	CCT67731.1	91.47	469	8	1	1	437	437	100	1	469	0	875
1474	829105865	uncharacterized protein LW93_9743 [Fusarium fujikuroi]	KLO82539.1	95.43	197	9	0	1	197	197	100	1	197	6e-109	395
1475	584144179	hypothetical protein FVEG_11895 [Fusarium verticillioides 7600]	EWG53468.1	88.61	667	71	3	1	663	663	100	1	666	0	1227
1476	584144178	alcohol dehydrogenase [Fusarium verticillioides 7600]	EWG53467.1	99.13	345	3	0	1	345	345	100	1	345	0	692
1477	75858871	zinc transporter protein [Fusarium verticillioides]	ABA29004.1	97.66	385	9	0	1	385	385	100	1	385	0	766
1478	587745497	hypothetical protein FOVG_08225 [Fusarium oxysporum f. sp. pisi HDV247]	EXA43213.1	90.36	477	46	0	1	477	477	100	1	477	0	906
1479	584144175	hypothetical protein FVEG_11891 [Fusarium verticillioides 7600]	EWG53464.1	95.17	435	21	0	1	435	435	100	1	435	0	856
1480	902728842	hypothetical protein FOXG_03985 [Fusarium oxysporum f. sp. lycopersici 4287]	KNB00411.1	80	260	41	1	1	249	256	97.2656	1	260	4e-114	414
1482	584144168	hypothetical protein FVEG_11886 [Fusarium verticillioides 7600]	EWG53457.1	97.91	478	10	0	1	478	481	99.3763	1	478	0	956
1488	584144164	hypothetical protein FVEG_11883 [Fusarium verticillioides 7600]	EWG53453.1	91.9	457	37	0	1	457	458	99.7817	50	506	0	855
1489	584144163	hypothetical protein FVEG_11882 [Fusarium verticillioides 7600]	EWG53452.1	89.95	408	3	2	1	370	370	100	1	408	0	666
1490	591406076	hypothetical protein FOCG_16575 [Fusarium oxysporum f. sp. radicis-lycopersici 26381]	EXL41213.1	96.02	528	21	0	1	528	528	100	1	528	0	1046
1491	584144161	serine/threonine protein kinase [Fusarium verticillioides 7600]	EWG53450.1	86.08	1322	162	2	1	1301	1302	99.9232	1	1321	0	2361
1492	591406078	hypothetical protein FOCG_16577 [Fusarium oxysporum f. sp. radicis-lycopersici 26381]	EXL41215.1	89.3	738	36	2	1	695	695	100	1	738	0	1275
1493	342879177	hypothetical protein FOXB_09045 [Fusarium oxysporum Fo5176]	EGU80435.1	91.59	523	29	2	1	509	509	100	1	522	0	964
1494	342879178	hypothetical protein FOXB_09046 [Fusarium oxysporum Fo5176]	EGU80436.1	98.48	462	7	0	1	462	462	100	1	462	0	919
1495	587745518	hypothetical protein FOVG_08245 [Fusarium oxysporum f. sp. pisi HDV247]	EXA43234.1	97.99	348	7	0	1	348	348	100	32	379	0	702
1496	475668847	Repressible acid phosphatase [Fusarium oxysporum f. sp. cubense race 4]	EMT66634.1	89.51	467	15	2	1	434	434	100	1	466	0	832
1497	517315824	uncharacterized protein FFUJ_14761 [Fusarium fujikuroi IMI 58289]	CCT67748.1	88.61	404	27	1	1	385	385	100	1	404	0	732
1498	829105838	tol protein [Fusarium fujikuroi]	KLO82512.1	91.64	694	44	1	1	680	680	100	1	694	0	1315
1499	584144153	hypothetical protein FVEG_11871 [Fusarium verticillioides 7600]	EWG53442.1	86.57	603	79	1	1	603	603	100	1	601	0	1086
1501	829103474	Uncharacterized protein LW93_6527 [Fusarium fujikuroi]	KLO80317.1	87.56	667	72	4	1	659	659	100	1	664	0	1189
1502	475668841	Pectate lyase A [Fusarium oxysporum f. sp. cubense race 4]	EMT66628.1	98.81	336	4	0	1	336	336	100	1	336	0	686
1504	1005390792	hypothetical protein FVEG_13959 [Fusarium verticillioides 7600]	KYG13706.1	97.72	438	10	0	1	438	438	100	24	461	0	874
1505	591486119	hypothetical protein FOTG_15748 [Fusarium oxysporum f. sp. vasinfectum 25433]	EXM15961.1	83.18	773	97	4	1	741	742	99.8652	1	772	0	1254
1506	342879187	hypothetical protein FOXB_09055 [Fusarium oxysporum Fo5176]	EGU80445.1	92.02	501	10	1	1	471	471	100	951	1451	0	902
1507	591471514	hypothetical protein FOIG_06924 [Fusarium oxysporum f. sp. cubense tropical race 4 54006]	EXM02798.1	91.23	285	25	0	1	285	285	100	1	285	6e-154	546
1508	1005390796	hypothetical protein FVEG_13962 [Fusarium verticillioides 7600]	KYG13710.1	90.48	767	21	2	1	715	715	100	1	767	0	1424
1509	829103483	GAL4-like transcriptional activator [Fusarium fujikuroi]	KLO80326.1	95.78	640	27	0	1	640	640	100	1	640	0	1251
1510	1005390798	hypothetical protein FVEG_13964 [Fusarium verticillioides 7600]	KYG13712.1	96.85	127	4	0	1	127	127	100	1	127	3e-67	256
1511	475668833	hypothetical protein FOC4_g10007032 [Fusarium oxysporum f. sp. cubense race 4]	EMT66620.1	72.13	287	55	4	1	264	264	100	1	285	1e-111	405
1512	591486113	hypothetical protein FOTG_15742 [Fusarium oxysporum f. sp. vasinfectum 25433]	EXM15955.1	93.72	207	13	0	7	213	213	97.1831	61	267	2e-111	404
1513	1005390801	hypothetical protein FVEG_13966 [Fusarium verticillioides 7600]	KYG13715.1	64.08	142	7	1	1	98	98	100	1	142	2e-42	174
1516	591435066	hypothetical protein FOPG_15875 [Fusarium oxysporum f. sp. conglutinans race 2 54008]	EXL68054.1	86.07	689	74	1	1	667	667	100	1	689	0	1238
1517	590054782	hypothetical protein FOQG_13330 [Fusarium oxysporum f. sp. raphani 54005]	EXK82306.1	77.91	163	36	0	1	163	164	99.3902	1	163	7e-71	268
1518	829118888	uncharacterized protein Y057_6704 [Fusarium fujikuroi]	KLO95113.1	77.86	1346	292	4	1	1345	1345	100	1	1341	0	2144
1519	517322229	related to E.coli galactoside O-acetyltransferase [Fusarium fujikuroi IMI 58289]	CCT72562.1	99.53	213	1	0	1	213	224	95.0893	1	213	6e-123	442
1520	587678799	hypothetical protein FOYG_00797 [Fusarium oxysporum FOSC 3-a]	EWZ01117.1	91.71	531	44	0	1	531	550	96.5455	1	531	0	993
1521	1005390809	hypothetical protein FVEG_13971 [Fusarium verticillioides 7600]	KYG13723.1	80.33	305	11	2	1	256	257	99.6109	1	305	5e-136	486
1522	517322226	related to cytosine deaminase and related metal-dependent hydrolases [Fusarium fujikuroi IMI 58289]	CCT72559.1	94.26	505	29	0	1	505	505	100	1	505	0	997
1523	591471492	hypothetical protein FOIG_06903 [Fusarium oxysporum f. sp. cubense tropical race 4 54006]	EXM02776.1	88.95	362	2	1	1	324	324	100	32	393	0	646
1524	342883122	hypothetical protein FOXB_05815 [Fusarium oxysporum Fo5176]	EGU83680.1	100	80	0	0	1	80	82	97.561	1	80	3e-43	176
1525	517322223	uncharacterized protein FFUJ_12434 [Fusarium fujikuroi IMI 58289]	CCT72556.1	82.77	766	121	2	1	758	758	100	1	763	0	1298
1526	590054771	hypothetical protein FOQG_13319 [Fusarium oxysporum f. sp. raphani 54005]	EXK82295.1	97.45	549	14	0	1	549	549	100	1	549	0	1078
1527	1005390815	hypothetical protein FVEG_13976 [Fusarium verticillioides 7600]	KYG13729.1	99.65	572	2	0	1	572	572	100	1	572	0	1187
1528	477514609	hypothetical protein FOC1_g10004607 [Fusarium oxysporum f. sp. cubense race 1]	ENH66976.1	92.08	404	8	1	1	380	380	100	1	404	0	758
1529	829103500	uncharacterized protein LW93_6553 [Fusarium fujikuroi]	KLO80343.1	94.73	778	23	2	1	760	760	100	1	778	0	1482
1530	517322218	related to D-arabinitol 2-dehydrogenase [Fusarium fujikuroi IMI 58289]	CCT72551.1	94.95	277	5	1	1	268	268	100	1	277	6e-151	536
1531	829103502	hydrolase dienelactone hydrolase [Fusarium fujikuroi]	KLO80345.1	96.76	247	8	0	1	247	247	100	1	247	2e-139	498
1532	517322214	uncharacterized protein FFUJ_12425 [Fusarium fujikuroi IMI 58289]	CCT72547.1	78.73	536	114	0	1	536	538	99.6283	1	536	0	895
1533	587700566	hypothetical protein FOZG_03130 [Fusarium oxysporum Fo47]	EWZ47171.1	98.32	357	6	0	1	357	357	100	1	357	0	718
1535	587745559	hypothetical protein FOVG_08284 [Fusarium oxysporum f. sp. pisi HDV247]	EXA43275.1	83.71	307	50	0	4	310	311	98.7138	402	708	5e-148	527
1536	587700544	hypothetical protein FOZG_03110 [Fusarium oxysporum Fo47]	EWZ47149.1	87.76	147	18	0	3	149	149	98.6577	1046	1192	1e-71	270
1537	477514620	hypothetical protein FOC1_g10004618 [Fusarium oxysporum f. sp. cubense race 1]	ENH66987.1	86.03	315	44	0	1	315	315	100	1212	1526	2e-160	568
1540	1005390823	hypothetical protein FVEG_17687 [Fusarium verticillioides 7600]	KYG13737.1	94.97	576	17	1	1	564	564	100	1	576	0	1141
1541	590042605	hypothetical protein FOMG_03179 [Fusarium oxysporum f. sp. melonis 26406]	EXK44463.1	96.6	294	10	0	1	294	294	100	24	317	1e-170	602
1543	475668806	hypothetical protein FOC4_g10007004 [Fusarium oxysporum f. sp. cubense race 4]	EMT66593.1	77.78	297	66	0	1	297	297	100	1	297	1e-134	483
1544	587710970	hypothetical protein FOWG_13992 [Fusarium oxysporum f. sp. lycopersici MN25]	EWZ82307.1	90.07	292	16	1	1	279	279	100	1	292	2e-153	544
1545	584137525	PiT family inorganic phosphate transporter [Fusarium verticillioides 7600]	EWG46867.1	97.23	613	15	1	1	611	611	100	1	613	0	1140
1546	477514628	4-coumarate--CoA ligase-like 7 [Fusarium oxysporum f. sp. cubense race 1]	ENH66995.1	93.17	630	10	2	1	597	597	100	1	630	0	1193
1547	342883132	hypothetical protein FOXB_05797 [Fusarium oxysporum Fo5176]	EGU83688.1	98.53	273	4	0	1	273	273	100	1	273	3e-156	554
1548	517322199	related to integral membrane protein PTH11 [Fusarium fujikuroi IMI 58289]	CCT72532.1	92.95	440	9	2	1	418	418	100	1	440	0	817
1549	829103518	putative isoamyl alcohol oxidase [Fusarium fujikuroi]	KLO80361.1	98.4	562	9	0	1	562	562	100	1	562	0	1145
1550	517322197	uncharacterized protein FFUJ_12408 [Fusarium fujikuroi IMI 58289]	CCT72530.1	84.86	185	0	1	1	157	157	100	1	185	4e-84	312
1552	829132814	uncharacterized protein Y057_4382 [Fusarium fujikuroi]	KLP06831.1	87.03	964	89	1	1	928	941	98.6185	1	964	0	1717
1553	517322195	uncharacterized protein FFUJ_12406 [Fusarium fujikuroi IMI 58289]	CCT73088.1	88.89	198	22	0	1	198	199	99.4975	1036	1233	4e-99	363
1554	517322194	uncharacterized protein FFUJ_12405 [Fusarium fujikuroi IMI 58289]	CCT72528.1	90.56	360	34	0	1	360	360	100	1	360	0	658
1555	584137545	hypothetical protein FVEG_07172 [Fusarium verticillioides 7600]	EWG46887.1	89.66	145	15	0	1	145	145	100	1	145	1e-69	265
1556	584137546	hypothetical protein FVEG_07173 [Fusarium verticillioides 7600]	EWG46888.1	96.54	347	12	0	1	347	347	100	1	347	0	692
1557	584137547	hypothetical protein FVEG_07174 [Fusarium verticillioides 7600]	EWG46889.1	88.61	158	18	0	1	158	168	94.0476	1	158	9e-79	295
1558	517322192	related to OYE2-NADPH dehydrogenase (old yellow enzyme), isoform 1 [Fusarium fujikuroi IMI 58289]	CCT72526.1	95.33	407	19	0	1	407	410	99.2683	1	407	0	807
1559	829103524	uncharacterized protein LW93_6578 [Fusarium fujikuroi]	KLO80367.1	75.46	216	42	1	1	205	208	98.5577	1	216	2e-88	328
1561	587745584	hypothetical protein FOVG_08308 [Fusarium oxysporum f. sp. pisi HDV247]	EXA43300.1	73.33	75	20	0	1	75	75	100	1	75	5e-25	116
1562	590042582	hypothetical protein FOMG_03158 [Fusarium oxysporum f. sp. melonis 26406]	EXK44440.1	92.9	338	23	1	32	368	368	91.5761	1	338	0	655
1564	587678769	hypothetical protein FOYG_00768 [Fusarium oxysporum FOSC 3-a]	EWZ01087.1	93.76	417	26	0	1	417	418	99.7608	1	417	0	816
1565	342878353	hypothetical protein FOXB_09812 [Fusarium oxysporum Fo5176]	EGU79699.1	97.46	511	13	0	1	511	511	100	1	511	0	1035
1566	829103528	putative UGT51-sterol glucosyltransferase (UDP-glucose:sterol glucosyltransferase) [Fusarium fujikuroi]	KLO80371.1	97.14	1436	24	1	1	1419	1419	100	1	1436	0	2788
1567	517322186	uncharacterized protein FFUJ_12397 [Fusarium fujikuroi IMI 58289]	CCT72520.1	71.6	493	125	2	1	493	493	100	1	478	0	669
1568	517322185	uncharacterized protein FFUJ_12396 [Fusarium fujikuroi IMI 58289]	CCT72519.1	87.6	250	31	0	1	250	250	100	1	250	9e-112	405
1569	751356624	hypothetical protein FAVG1_02909 [Fusarium avenaceum]	KIL94346.1	99.16	119	1	0	1	119	119	100	978	1096	4e-65	249
1570	584137558	hypothetical protein FVEG_16033 [Fusarium verticillioides 7600]	EWG46900.1	93.94	297	18	0	1	297	297	100	1	297	1e-164	582
1571	584137559	hypothetical protein FVEG_07185 [Fusarium verticillioides 7600]	EWG46901.1	97.14	769	7	1	1	754	754	100	29	797	0	1451
1572	584137561	condensin complex subunit 1 [Fusarium verticillioides 7600]	EWG46903.1	89.14	1215	20	5	1	1103	1103	100	1	1215	0	2122
1573	829103535	putative CDC7-protein kinase [Fusarium fujikuroi]	KLO80378.1	89	500	8	2	1	453	453	100	1	500	0	870
1574	342878344	hypothetical protein FOXB_09803 [Fusarium oxysporum Fo5176]	EGU79690.1	100	149	0	0	1	149	149	100	1	149	4e-81	302
1575	477514657	ATP-dependent RNA helicase chl-1 [Fusarium oxysporum f. sp. cubense race 1]	ENH67024.1	97.22	864	24	0	1	864	864	100	1	864	0	1716
1576	517322177	related to purine-cytosine permease [Fusarium fujikuroi IMI 58289]	CCT72511.1	93.52	494	2	1	1	464	464	100	1	494	0	865
1577	829103539	uncharacterized protein LW93_6594 [Fusarium fujikuroi]	KLO80382.1	82.61	483	74	1	4	486	486	99.3827	18	490	0	833
1578	475668769	Na(+)/H(+) antiporter 2 [Fusarium oxysporum f. sp. cubense race 4]	EMT66556.1	96.83	536	11	1	1	530	530	100	1	536	0	1028
1579	517322174	uncharacterized protein FFUJ_12385 [Fusarium fujikuroi IMI 58289]	CCT72508.1	82.73	220	16	2	1	198	198	100	1	220	1e-68	261
1580	517322173	related to N-acetyltransferase, GNAT family [Fusarium fujikuroi IMI 58289]	CCT72507.1	93.06	173	12	0	1	173	174	99.4253	1	173	1e-91	338
1581	342878338	hypothetical protein FOXB_09797 [Fusarium oxysporum Fo5176]	EGU79684.1	85.25	305	14	2	11	315	315	96.8254	72	345	1e-121	439
1582	591471423	hypothetical protein FOIG_06846 [Fusarium oxysporum f. sp. cubense tropical race 4 54006]	EXM02707.1	81.36	59	11	0	13	71	71	83.0986	69	127	2e-20	100
1583	342878336	hypothetical protein FOXB_09795 [Fusarium oxysporum Fo5176]	EGU79682.1	99.48	573	3	0	1	573	573	100	1	573	0	1167
1584	342878335	hypothetical protein FOXB_09794 [Fusarium oxysporum Fo5176]	EGU79681.1	97.73	132	3	0	1	132	132	100	1	132	2e-68	260
1585	584137585	hypothetical protein FVEG_07198 [Fusarium verticillioides 7600]	EWG46927.1	90.79	445	3	2	1	407	407	100	1	445	0	808
1586	517322167	CI-23 NADH-ubiquinone oxidoreductase 23 kDa subunit precursor [Fusarium fujikuroi IMI 58289]	CCT72501.1	100	215	0	0	1	215	215	100	1	215	2e-124	447
1587	587710902	hypothetical protein FOWG_13944 [Fusarium oxysporum f. sp. lycopersici MN25]	EWZ82239.1	93.96	563	18	1	1	547	547	100	1	563	0	1033
1588	587678721	hypothetical protein FOYG_00740 [Fusarium oxysporum FOSC 3-a]	EWZ01039.1	93.14	277	17	1	1	277	277	100	1	275	2e-147	525
1589	584137589	hypothetical protein FVEG_07202 [Fusarium verticillioides 7600]	EWG46931.1	90.2	306	10	1	1	286	287	99.6516	1	306	1e-155	552
1590	475668756	hypothetical protein FOC4_g10006952 [Fusarium oxysporum f. sp. cubense race 4]	EMT66543.1	95.15	165	8	0	1	165	165	100	1	165	1e-81	305
1591	829103551	uncharacterized protein LW93_6607 [Fusarium fujikuroi]	KLO80394.1	91.63	251	21	0	1	251	251	100	1	251	2e-107	391
1592	829103552	protein-L-isoaspartate(D-aspartate) O-methyltransferase [Fusarium fujikuroi]	KLO80395.1	97.92	240	5	0	1	240	240	100	291	530	8e-137	489
1593	829126609	metal homeostasis protein [Fusarium fujikuroi]	KLP01749.1	98.49	331	5	0	1	331	331	100	1	331	0	665
1594	584137594	hypothetical protein FVEG_07207 [Fusarium verticillioides 7600]	EWG46936.1	99.14	116	1	0	1	116	116	100	23	138	2e-61	237
1595	517322158	probable citrate transport protein, mitochondrial [Fusarium fujikuroi IMI 58289]	CCT72493.1	99.66	298	1	0	1	298	298	100	1	298	1e-171	605
1597	584137596	hypothetical protein FVEG_07209 [Fusarium verticillioides 7600]	EWG46938.1	96.2	1475	23	3	1	1442	1442	100	1	1475	0	2869
1598	584137597	hypothetical protein FVEG_07210 [Fusarium verticillioides 7600]	EWG46939.1	93.16	307	20	1	1	307	308	99.6753	1	306	1e-165	585
1599	584137598	hypothetical protein FVEG_07211 [Fusarium verticillioides 7600]	EWG46940.1	94.31	334	16	1	1	331	332	99.6988	1	334	0	637
1600	587710889	hypothetical protein FOWG_13931 [Fusarium oxysporum f. sp. lycopersici MN25]	EWZ82226.1	86.08	553	40	2	1	519	519	100	1	550	0	978
1601	517322152	probable methionine synthase, vitamin-b12 independent [Fusarium fujikuroi IMI 58289]	CCT72488.1	99.26	405	3	0	1	405	405	100	1	405	0	838
1604	587745649	hypothetical protein FOVG_08353 [Fusarium oxysporum f. sp. pisi HDV247]	EXA43365.1	79.7	527	103	1	2	524	524	99.8092	562	1088	0	871
1605	587700453	hypothetical protein FOZG_03038 [Fusarium oxysporum Fo47]	EWZ47058.1	76.3	519	94	3	1	519	540	96.1111	4	493	0	808
1606	517322150	related to 4-hydroxybenzoate transporter [Fusarium fujikuroi IMI 58289]	CCT72486.1	98.9	544	6	0	1	544	544	100	1	544	0	1096
1607	584137608	hypothetical protein FVEG_07217 [Fusarium verticillioides 7600]	EWG46950.1	95.34	322	15	0	1	322	322	100	1	322	1e-177	625
1608	590064260	hypothetical protein FOQG_06455 [Fusarium oxysporum f. sp. raphani 54005]	EXK91784.1	89.02	264	29	0	1	264	264	100	1	264	1e-134	482
1609	584137610	hypothetical protein FVEG_07218 [Fusarium verticillioides 7600]	EWG46952.1	96.31	407	15	0	1	407	407	100	1	407	0	687
1610	584137611	hypothetical protein FVEG_07219 [Fusarium verticillioides 7600]	EWG46953.1	90.59	457	43	0	1	457	457	100	1	457	0	865
1611	584137612	hypothetical protein FVEG_16042 [Fusarium verticillioides 7600]	EWG46954.1	85.09	228	32	2	1	227	227	100	227	453	2e-110	401
1615	517322140	uncharacterized protein FFUJ_12351 [Fusarium fujikuroi IMI 58289]	CCT72476.1	87.67	146	18	0	1	146	149	97.9866	1	146	4e-70	266
1616	475668727	hypothetical protein FOC4_g10006923 [Fusarium oxysporum f. sp. cubense race 4]	EMT66514.1	94.58	369	18	1	1	367	367	100	1	369	6e-152	540
1617	584137619	hypothetical protein FVEG_07224 [Fusarium verticillioides 7600]	EWG46961.1	91.46	246	1	1	1	226	247	91.498	1	246	4e-124	447
1618	517322137	related to GPI-anchor transamidase complex subunit Gpi16 [Fusarium fujikuroi IMI 58289]	CCT72473.1	91.21	580	4	1	1	533	533	100	1	580	0	1051
1619	584137621	hypothetical protein FVEG_07226 [Fusarium verticillioides 7600]	EWG46963.1	97.89	190	4	0	1	190	190	100	1	190	5e-106	386
1620	590042493	phytanoyl-CoA hydroxylase [Fusarium oxysporum f. sp. melonis 26406]	EXK44351.1	93.6	328	21	0	1	328	328	100	1	328	0	640
1621	587700433	N4-(beta-N-acetylglucosaminyl)-L-asparaginase [Fusarium oxysporum Fo47]	EWZ47038.1	90.38	343	1	1	1	311	311	100	1	343	6e-169	596
1622	584137624	hypothetical protein FVEG_07228 [Fusarium verticillioides 7600]	EWG46966.1	90.88	943	81	1	1	938	938	100	1	943	0	1767
1623	584137625	hypothetical protein FVEG_07229 [Fusarium verticillioides 7600]	EWG46967.1	93.27	327	7	1	1	312	312	100	1	327	3e-168	594
1624	584137626	hypothetical protein FVEG_07230 [Fusarium verticillioides 7600]	EWG46968.1	93.25	474	32	0	1	474	474	100	1	474	0	906
1625	591487863	hypothetical protein FOTG_14153 [Fusarium oxysporum f. sp. vasinfectum 25433]	EXM17617.1	94.84	213	11	0	1	213	213	100	81	293	5e-116	419
1626	342878891	hypothetical protein FOXB_09305 [Fusarium oxysporum Fo5176]	EGU80176.1	96.96	362	11	0	1	362	362	100	1	362	0	646
1627	342878892	hypothetical protein FOXB_09306 [Fusarium oxysporum Fo5176]	EGU80177.1	97.21	537	15	0	1	537	537	100	1	537	0	1062
1628	584137630	hypothetical protein FVEG_07234 [Fusarium verticillioides 7600]	EWG46972.1	89.44	303	30	1	1	301	301	100	1	303	4e-157	557
1629	829103586	Isoflavone reductase P3 [Fusarium fujikuroi]	KLO80429.1	93.83	324	19	1	1	323	323	100	1	324	5e-175	617
1631	584137632	hypothetical protein FVEG_07237 [Fusarium verticillioides 7600]	EWG46974.1	89.2	398	43	0	1	398	398	100	1	398	0	741
1632	584137634	hypothetical protein FVEG_07238 [Fusarium verticillioides 7600]	EWG46976.1	92.56	645	33	1	1	630	631	99.8415	1	645	0	1190
1633	829103590	Uncharacterized protein LW93_6648 [Fusarium fujikuroi]	KLO80433.1	97.58	248	6	0	1	248	248	100	1	248	2e-140	501
1634	587710850	hypothetical protein FOWG_13894 [Fusarium oxysporum f. sp. lycopersici MN25]	EWZ82187.1	88.57	175	20	0	1	175	175	100	1	175	5e-90	332
1635	587700412	hypothetical protein FOZG_03003 [Fusarium oxysporum Fo47]	EWZ47017.1	79.5	239	49	0	1	239	239	100	38	276	1e-105	385
1636	829150739	BCS1-mitochondrial protein of the AAA family of ATPase [Fusarium fujikuroi]	KLP19200.1	98.14	485	9	0	1	485	485	100	1	485	0	990
1638	584137640	hypothetical protein FVEG_07243 [Fusarium verticillioides 7600]	EWG46982.1	75.58	86	20	1	1	86	104	82.6923	1	85	2e-29	130
1639	584137641	hypothetical protein FVEG_07244 [Fusarium verticillioides 7600]	EWG46983.1	89.3	327	15	1	1	307	307	100	1	327	1e-167	592
1640	829140845	uncharacterized protein LW94_13553 [Fusarium fujikuroi]	KLP13252.1	93.89	736	38	3	62	791	791	92.2882	1	735	0	1405
1641	584137643	hypothetical protein FVEG_07246 [Fusarium verticillioides 7600]	EWG46985.1	91.64	347	29	0	1	347	347	100	1	347	0	672
1642	342878868	hypothetical protein FOXB_09322 [Fusarium oxysporum Fo5176]	EGU80155.1	74.44	2062	344	16	1	1889	1889	100	1	2052	0	3017
1643	584137645	aldehyde dehydrogenase (NAD+) [Fusarium verticillioides 7600]	EWG46987.1	96.28	484	2	1	1	468	468	100	1	484	0	944
1644	584137646	hypothetical protein FVEG_07249 [Fusarium verticillioides 7600]	EWG46988.1	75.85	207	42	1	21	219	219	90.8676	107	313	1e-86	322
1645	475668697	hypothetical protein FOC4_g10006892 [Fusarium oxysporum f. sp. cubense race 4]	EMT66484.1	60.61	132	50	1	1	130	130	100	38	169	1e-31	137
1648	829142447	uncharacterized protein LW94_6495 [Fusarium fujikuroi]	KLP14168.1	84.89	139	21	0	1	139	139	100	1	139	1e-63	244
1649	829103605	uncharacterized protein LW93_6663 [Fusarium fujikuroi]	KLO80448.1	75.88	170	38	1	1	167	167	100	1	170	3e-65	250
1650	829103606	uncharacterized protein LW93_6664 [Fusarium fujikuroi]	KLO80449.1	85.96	356	24	1	1	330	330	100	1	356	1e-177	625
1651	517322105	related to integral membrane protein [Fusarium fujikuroi IMI 58289]	CCT73056.1	86.62	142	5	1	1	128	128	100	55	196	2e-63	244
1652	590064203	hypothetical protein FOQG_06403 [Fusarium oxysporum f. sp. raphani 54005]	EXK91727.1	94.77	1453	76	0	1	1453	1453	100	1	1453	0	2809
1653	517322102	related to ADH7-NADP(H)-dependent alcohol dehydrogenase [Fusarium fujikuroi IMI 58289]	CCT72440.1	99.09	331	3	0	1	331	331	100	1	331	0	672
1654	342878882	hypothetical protein FOXB_09336 [Fusarium oxysporum Fo5176]	EGU80169.1	91.36	787	10	2	1	729	729	100	1	787	0	1436
1656	584137661	hypothetical protein FVEG_07260 [Fusarium verticillioides 7600]	EWG47003.1	87.22	313	25	1	1	298	298	100	32	344	9e-157	556
1657	517322099	probable endo-1,4-beta-xylanase B precursor [Fusarium fujikuroi IMI 58289]	CCT72437.1	75	308	12	3	1	243	243	100	1	308	1e-118	428
1658	584137664	hypothetical protein FVEG_16055 [Fusarium verticillioides 7600]	EWG47006.1	92.76	359	26	0	72	430	430	83.4884	1	359	0	705
1659	587700375	hypothetical protein FOZG_02968 [Fusarium oxysporum Fo47]	EWZ46980.1	85.39	89	13	0	10	98	98	90.8163	29	117	3e-37	157
1660	475668682	hypothetical protein FOC4_g10006874 [Fusarium oxysporum f. sp. cubense race 4]	EMT66469.1	74.58	177	27	1	1	159	159	100	128	304	3e-72	273
1662	829103614	aspartate-tRNA ligase, cytosolic [Fusarium fujikuroi]	KLO80457.1	97.36	910	14	1	70	969	969	92.8793	57	966	0	1800
1663	517322096	related to triacylglycerol lipase [Fusarium fujikuroi IMI 58289]	CCT72435.1	99.22	386	3	0	1	386	386	100	1	386	0	782
1664	587710807	hypothetical protein FOWG_13854 [Fusarium oxysporum f. sp. lycopersici MN25]	EWZ82144.1	99.51	205	1	0	1	205	205	100	70	274	8e-117	422
1665	584137672	hypothetical protein FVEG_07265 [Fusarium verticillioides 7600]	EWG47014.1	98.93	845	9	0	1	845	845	100	7	851	0	1756
1668	584137677	bifunctional P-450:NADPH-P450 reductase [Fusarium verticillioides 7600]	EWG47019.1	95.22	1066	7	2	1	1022	1022	100	1	1066	0	2085
1669	829133976	uncharacterized protein Y057_10929 [Fusarium fujikuroi]	KLP07786.1	65.93	226	60	2	4	229	261	86.59	2	210	1e-59	233
1671	584137683	hypothetical protein FVEG_07272 [Fusarium verticillioides 7600]	EWG47025.1	98.69	383	5	0	1	383	383	100	1	383	0	784
1672	342876732	hypothetical protein FOXB_11203 [Fusarium oxysporum Fo5176]	EGU78291.1	97.08	821	6	1	1	803	803	100	1	821	0	1648
1673	517322087	related to RNA-binding protein La1 [Fusarium fujikuroi IMI 58289]	CCT72429.1	94.22	398	11	2	1	386	386	100	1	398	1e-177	626
1674	517322086	related to quinic acid utilisation protein QUTG (inositol-1(or 4)-monophosphatase) [Fusarium fujikuroi IMI 58289]	CCT72428.1	98.65	297	4	0	1	297	297	100	1	297	9e-171	602
1675	342876729	hypothetical protein FOXB_11200 [Fusarium oxysporum Fo5176]	EGU78288.1	99.55	223	1	0	1	223	223	100	1005	1227	4e-125	450
1676	587678609	hypothetical protein FOYG_00641 [Fusarium oxysporum FOSC 3-a]	EWZ00927.1	96.36	522	19	0	1	522	522	100	1	522	0	1057
1677	591492675	hypothetical protein FOTG_09931 [Fusarium oxysporum f. sp. vasinfectum 25433]	EXM22265.1	94.39	446	22	1	1	446	446	100	109	551	0	787
1679	517322082	related to URB1 Nucleolar protein required for the normal accumulation of 25S and 5.8S rRNAs [Fusarium fujikuroi IMI 58289]	CCT72424.1	95.07	1136	50	1	1	1136	1136	100	1	1130	0	2179
1680	262069076	chitin synthase V [Fusarium verticillioides]	ACY08042.1	98.39	1862	5	1	1	1837	1837	100	1	1862	0	3788
1681	262069080	chitin synthase 7 [Fusarium verticillioides]	ACY08044.1	94.72	1780	13	3	1	1699	1699	100	1	1780	0	3434
1682	517322079	related to branched-chain alpha-ketoacid dehydrogenase kinase, mitochondrial precursor [Fusarium fujikuroi IMI 58289]	CCT72421.1	96.62	414	14	0	1	414	414	100	1	414	0	801
1683	584137700	hypothetical protein FVEG_07283 [Fusarium verticillioides 7600]	EWG47042.1	97.18	71	2	0	1	71	71	100	1	71	8e-33	142
1684	517322077	probable cytochrome P450 (involved in C-22 denaturation of the ergosterol side-chain) [Fusarium fujikuroi IMI 58289]	CCT72419.1	99.81	536	1	0	1	536	536	100	1	536	0	1117
1685	517322076	related to D.melanogaster heat shock protein 67B2 [Fusarium fujikuroi IMI 58289]	CCT72418.1	91.46	164	14	0	2	165	165	99.3939	33	196	2e-84	313
1686	342876722	hypothetical protein FOXB_11193 [Fusarium oxysporum Fo5176]	EGU78281.1	98.94	282	3	0	1	282	282	100	1	282	4e-159	563
1687	517322074	related to polymerase I core factor (CF) subunit [Fusarium fujikuroi IMI 58289]	CCT73086.1	95.53	627	25	1	1	627	627	100	1	624	0	1159
1688	342876720	hypothetical protein FOXB_11191 [Fusarium oxysporum Fo5176]	EGU78279.1	100	164	0	0	1	164	164	100	1	164	6e-93	342
1689	517322072	related to SAC2 protein [Fusarium fujikuroi IMI 58289]	CCT72415.1	97.58	662	16	0	1	662	662	100	1	662	0	1332
1690	584137711	hypothetical protein FVEG_07291 [Fusarium verticillioides 7600]	EWG47053.1	95.43	416	17	1	1	414	414	100	1	416	0	810
1691	584137714	hypothetical protein FVEG_16066 [Fusarium verticillioides 7600]	EWG47056.1	86.89	1411	96	5	1	1365	1365	100	1	1368	0	2437
1692	517322069	probable FUN12-general translation factor eIF2 homolog [Fusarium fujikuroi IMI 58289]	CCT72412.1	93.97	1045	28	4	14	1025	1025	98.7317	14	1056	0	1545
1693	936405537	Heat shock protein hsp88 [Neonectria ditissima]	KPM34737.1	70.68	764	169	11	1	726	726	100	1	747	0	1037
1694	591492711	chitin synthase [Fusarium oxysporum f. sp. vasinfectum 25433]	EXM22301.1	96.4	694	25	0	1	694	694	100	74	767	0	1373
1695	587710748	hypothetical protein FOWG_13820 [Fusarium oxysporum f. sp. lycopersici MN25]	EWZ82085.1	98.49	1129	17	0	25	1153	1153	97.9185	8	1136	0	2289
1696	517322065	probable nitrate reductase [Fusarium fujikuroi IMI 58289]	CCT72410.1	96.88	897	28	0	9	905	905	99.116	11	907	0	1792
1697	517322064	related to vacuolar Ca2+/H+ antiporter [Fusarium fujikuroi IMI 58289]	CCT72409.1	98.04	460	8	1	12	471	471	97.6645	3	461	0	922
1698	596555494	hypothetical protein FG05_12034 [Fusarium graminearum]	EYB34513.1	82.83	1619	173	10	1	1515	1523	99.4747	1	1618	0	2680
1699	584137728	hypothetical protein FVEG_07302 [Fusarium verticillioides 7600]	EWG47070.1	91.3	299	3	1	1	276	276	100	1	299	2e-141	505
1700	584137729	hypothetical protein FVEG_07303 [Fusarium verticillioides 7600]	EWG47071.1	90.07	564	38	1	3	548	560	97.5	94	657	0	1029
1701	517322059	related to `extra sex combs` protein (WD-40 repeat family protein) [Fusarium fujikuroi IMI 58289]	CCT72405.1	92.78	554	7	2	1	547	547	100	1	528	0	1007
1702	591451902	hypothetical protein FOPG_03299 [Fusarium oxysporum f. sp. conglutinans race 2 54008]	EXL84212.1	87	400	33	1	4	384	384	99.2188	3	402	0	705
1703	584137735	hypothetical protein FVEG_07304 [Fusarium verticillioides 7600]	EWG47077.1	100	235	0	0	1	235	235	100	1	235	1e-133	478
1704	587678547	hypothetical protein FOYG_00611 [Fusarium oxysporum FOSC 3-a]	EWZ00865.1	99.69	325	1	0	1	325	325	100	1	325	0	661
1705	477509794	Amino-acid acetyltransferase, mitochondrial [Fusarium oxysporum f. sp. cubense race 1]	ENH63083.1	96.09	614	24	0	1	614	615	99.8374	1	614	0	1217
1706	517322054	uncharacterized protein FFUJ_12267 [Fusarium fujikuroi IMI 58289]	CCT72400.1	88.21	441	27	1	1	416	416	100	1	441	0	741
1707	475668628	Putative oxidoreductase yfjR [Fusarium oxysporum f. sp. cubense race 4]	EMT66415.1	96.74	307	10	0	1	307	307	100	1	307	1e-172	608
1709	342880006	hypothetical protein FOXB_08269 [Fusarium oxysporum Fo5176]	EGU81236.1	98.95	287	3	0	1	287	287	100	1	287	4e-163	577
1710	591492743	hypothetical protein FOTG_09968 [Fusarium oxysporum f. sp. vasinfectum 25433]	EXM22333.1	93.78	627	19	2	1	608	608	100	1	626	0	1177
1711	829134018	cutinase transcription factor 1 beta [Fusarium fujikuroi]	KLP07828.1	89.13	966	32	3	1	893	893	100	1	966	0	1731
1712	591471232	GPI ethanolamine phosphate transferase 1 [Fusarium oxysporum f. sp. cubense tropical race 4 54006]	EXM02516.1	96.95	984	27	1	1	984	984	100	1	981	0	1951
1713	590042331	hypothetical protein FOMG_02985 [Fusarium oxysporum f. sp. melonis 26406]	EXK44189.1	76.45	467	28	3	1	385	385	100	1	467	0	671
1714	584137746	adenosinetriphosphatase [Fusarium verticillioides 7600]	EWG47088.1	99.75	408	1	0	1	408	408	100	1	408	0	838
1715	517322045	probable cystathionine beta-lyase [Fusarium fujikuroi IMI 58289]	CCT72392.1	100	446	0	0	1	446	446	100	1	446	0	922
1716	517322044	uncharacterized protein FFUJ_12257 [Fusarium fujikuroi IMI 58289]	CCT72391.1	89.34	122	13	0	1	122	122	100	1	122	7e-58	225
1717	584137748	hypothetical protein FVEG_07319 [Fusarium verticillioides 7600]	EWG47090.1	99.37	475	3	0	1	475	475	100	1	475	0	969
1718	342879998	hypothetical protein FOXB_08261 [Fusarium oxysporum Fo5176]	EGU81228.1	92.53	576	21	2	1	554	554	100	1	576	0	1060
1719	829103670	putative sphingosine-1-phosphate lyase [Fusarium fujikuroi]	KLO80513.1	94.56	1122	31	2	1	1092	1096	99.635	1	1122	0	2174
1720	477509781	Mismatch repair endonuclease PMS2 [Fusarium oxysporum f. sp. cubense race 1]	ENH63070.1	84.85	1010	89	3	1	946	946	100	1	1010	0	1698
1721	475668614	hypothetical protein FOC4_g10006805 [Fusarium oxysporum f. sp. cubense race 4]	EMT66401.1	92.25	529	9	1	1	497	498	99.7992	1	529	0	954
1722	587745838	ferredoxin-NADP+ reductase [Fusarium oxysporum f. sp. pisi HDV247]	EXA43554.1	94.99	519	26	0	1	519	519	100	3	521	0	1018
1723	342879993	hypothetical protein FOXB_08256 [Fusarium oxysporum Fo5176]	EGU81223.1	98.85	347	4	0	1	347	347	100	1	347	0	689
1724	584137764	hypothetical protein FVEG_07326 [Fusarium verticillioides 7600]	EWG47106.1	91.3	678	15	3	1	641	641	100	1	671	0	1194
1725	587700262	carnitine O-acetyltransferase [Fusarium oxysporum Fo47]	EWZ46867.1	97.54	568	4	1	1	558	573	97.3822	29	596	0	1118
1726	587745844	hypothetical protein FOVG_08491 [Fusarium oxysporum f. sp. pisi HDV247]	EXA43560.1	97.97	541	10	1	1	541	541	100	1	540	0	1000
1727	584137769	hypothetical protein FVEG_07329 [Fusarium verticillioides 7600]	EWG47111.1	88.7	478	16	1	1	440	440	100	1	478	0	851
1728	587678510	minichromosome maintenance protein 3 [Fusarium oxysporum FOSC 3-a]	EWZ00828.1	99.2	879	7	0	1	879	879	100	1	879	0	1796
1729	342879987	hypothetical protein FOXB_08250 [Fusarium oxysporum Fo5176]	EGU81217.1	99.68	632	2	0	1	632	632	100	1	632	0	1304
1730	587745848	hypothetical protein FOVG_08495 [Fusarium oxysporum f. sp. pisi HDV247]	EXA43564.1	94.37	1207	68	0	1	1207	1207	100	1	1207	0	2333
1731	477509770	hypothetical protein FOC1_g10006672 [Fusarium oxysporum f. sp. cubense race 1]	ENH63059.1	97.63	337	8	0	1	337	337	100	1	337	0	684
1732	475668601	Protein transport protein SEC23 [Fusarium oxysporum f. sp. cubense race 4]	EMT66388.1	82.1	771	9	5	1	642	642	100	1	771	0	1246
1733	517322020	probable ribosomal protein L12 [Fusarium fujikuroi IMI 58289]	CCT73125.1	93.94	165	0	1	1	155	155	100	1	165	7e-81	301
1734	517322019	related to UDP-N-acetylglucosamine-peptide N-acetylglucosaminyltransferase [Fusarium fujikuroi IMI 58289]	CCT72371.1	97.12	1491	43	0	1	1491	1491	100	1	1491	0	2973
1735	587700248	myb-like DNA-binding protein FlbD [Fusarium oxysporum Fo47]	EWZ46853.1	96.1	282	11	0	1	282	282	100	1	282	6e-147	523
1736	517322017	uncharacterized protein FFUJ_12230 [Fusarium fujikuroi IMI 58289]	CCT72369.1	84.26	470	47	1	1	443	443	100	1	470	0	795
1737	829114078	uncharacterized protein LW93_5960 [Fusarium fujikuroi]	KLO90495.1	90.32	475	44	1	1	473	473	100	1	475	0	857
1738	342879142	hypothetical protein FOXB_09082 [Fusarium oxysporum Fo5176]	EGU80406.1	100	104	0	0	1	104	104	100	73	176	3e-56	220
1739	591471184	hypothetical protein FOIG_06677 [Fusarium oxysporum f. sp. cubense tropical race 4 54006]	EXM02468.1	93.05	921	42	1	1	899	899	100	1	921	0	1730
1741	927760861	hypothetical protein FLAG1_03150 [Fusarium langsethiae]	KPA43892.1	82.51	263	19	4	1	248	248	100	93	343	5e-77	290
1742	587745871	hypothetical protein FOVG_08508 [Fusarium oxysporum f. sp. pisi HDV247]	EXA43587.1	97.61	251	6	0	1	251	251	100	1	251	5e-141	503
1743	475668590	Putative N-acetyltransferase C16C4.12 [Fusarium oxysporum f. sp. cubense race 4]	EMT66377.1	85.79	190	0	1	1	163	163	100	1	190	8e-90	331
1744	477509758	hypothetical protein FOC1_g10006660 [Fusarium oxysporum f. sp. cubense race 1]	ENH63047.1	96.89	289	9	0	1	289	293	98.6348	58	346	3e-152	541
1745	517322009	probable FZR protein (fizzy-related protein) [Fusarium fujikuroi IMI 58289]	CCT72361.1	97.54	609	3	1	1	597	597	100	1	609	0	1189
1746	475668587	hypothetical protein FOC4_g10006778 [Fusarium oxysporum f. sp. cubense race 4]	EMT66374.1	97.35	566	15	0	1	566	566	100	1	566	0	1152
1747	590064037	structural maintenance-chromosome 1 [Fusarium oxysporum f. sp. raphani 54005]	EXK91561.1	91.39	1254	17	3	1	1163	1163	100	1	1254	0	2276
1748	342886898	hypothetical protein FOXB_02924 [Fusarium oxysporum Fo5176]	EGU86595.1	99.47	375	2	0	1	375	375	100	1	375	0	771
1749	587700224	hypothetical protein FOZG_02874 [Fusarium oxysporum Fo47]	EWZ46829.1	86.3	460	11	2	16	423	423	96.4539	16	475	0	788
1750	829114066	uncharacterized protein LW93_5948 [Fusarium fujikuroi]	KLO90483.1	87.68	211	20	1	15	219	219	93.6073	75	285	1e-83	312
1751	829114065	signal recognition particle protein [Fusarium fujikuroi]	KLO90482.1	96.98	630	19	0	1	630	644	97.8261	1	630	0	1214
1752	584137816	hypothetical protein FVEG_07355 [Fusarium verticillioides 7600]	EWG47158.1	98.08	1407	21	3	1	1402	1402	100	1	1406	0	2769
1753	475668580	Putative metallocarboxypeptidase ecm14 [Fusarium oxysporum f. sp. cubense race 4]	EMT66367.1	93.68	459	23	1	1	459	467	98.2869	78	530	0	893
1754	342886892	hypothetical protein FOXB_02918 [Fusarium oxysporum Fo5176]	EGU86589.1	83.89	149	1	1	1	126	126	100	1	149	3e-63	243
1755	584137819	DNA polymerase IV [Fusarium verticillioides 7600]	EWG47161.1	89.38	584	24	1	1	546	546	100	1	584	0	1062
1756	587745892	hypothetical protein FOVG_08522 [Fusarium oxysporum f. sp. pisi HDV247]	EXA43608.1	98.63	364	5	0	1	364	384	94.7917	1	364	0	726
1757	590064026	hypothetical protein FOQG_06293 [Fusarium oxysporum f. sp. raphani 54005]	EXK91550.1	89.97	309	18	1	1	296	296	100	1	309	9e-158	559
1758	477509745	AP-1 complex subunit gamma-1 [Fusarium oxysporum f. sp. cubense race 1]	ENH63034.1	95.67	1431	14	3	2	1402	1402	99.9287	28	1440	0	2728
1759	770389484	AP-1 complex subunit gamma-1 [Metarhizium anisopliae BRIP 53293]	KJK75482.1	93.75	160	10	0	5	164	165	96.9697	47	206	4e-83	309
1760	587678450	syntaxin 16 [Fusarium oxysporum FOSC 3-a]	EWZ00768.1	99.71	344	1	0	1	344	344	100	1	344	0	710
1762	584137828	hypothetical protein FVEG_07365 [Fusarium verticillioides 7600]	EWG47170.1	100	69	0	0	1	69	69	100	1	69	8e-33	142
1763	584137829	hypothetical protein FVEG_07366 [Fusarium verticillioides 7600]	EWG47171.1	88.24	238	5	1	1	215	215	100	1	238	9e-103	375
1764	517321989	related to RTT103 Regulator of Ty1 Transposition [Fusarium fujikuroi IMI 58289]	CCT72345.1	97.28	405	10	1	1	405	406	99.7537	1	404	0	795
1765	517321988	probable multidrug resistance protein 2 [Fusarium fujikuroi IMI 58289]	CCT73052.1	94.23	797	8	1	1	759	760	99.8684	1	797	0	1446
1766	584137832	hypothetical protein FVEG_07369 [Fusarium verticillioides 7600]	EWG47174.1	99	299	3	0	1	299	299	100	1	299	2e-172	608
1767	517321986	related to cation diffusion facilitator 10 [Fusarium fujikuroi IMI 58289]	CCT72343.1	89.87	454	16	1	1	424	424	100	1	454	0	846
1768	584137839	hypothetical protein FVEG_16080 [Fusarium verticillioides 7600]	EWG47181.1	93.42	790	37	1	1	775	775	100	1	790	0	1413
1769	517321984	related to HRD1-involved in degradation of Hmg2p [Fusarium fujikuroi IMI 58289]	CCT72341.1	94.02	836	30	1	1	816	816	100	4	839	0	1582
1770	591471137	hypothetical protein FOIG_06646 [Fusarium oxysporum f. sp. cubense tropical race 4 54006]	EXM02421.1	93.31	254	17	0	1	254	254	100	1	254	5e-136	486
1772	517321981	uncharacterized protein FFUJ_12194 [Fusarium fujikuroi IMI 58289]	CCT72338.1	96.34	628	14	1	1	619	625	99.04	1	628	0	1194
1774	517321978	related to TGF beta receptor associated protein 1 [Fusarium fujikuroi IMI 58289]	CCT72335.1	92.47	1195	30	4	1	1135	1135	100	1	1195	0	2189
1775	342886871	hypothetical protein FOXB_02897 [Fusarium oxysporum Fo5176]	EGU86568.1	92.66	722	9	4	1	678	678	100	1	722	0	1335
1776	517321976	related to malate dehydrogenase [Fusarium fujikuroi IMI 58289]	CCT72333.1	89.35	263	6	1	1	241	242	99.5868	1	263	1e-131	472
1777	829108370	uncharacterized protein Y057_3838 [Fusarium fujikuroi]	KLO84943.1	93.37	875	26	1	112	954	954	88.3648	1	875	0	1629
1778	408387773	hypothetical protein FPSE_12347 [Fusarium pseudograminearum CS3096]	EKJ67482.1	81.58	228	15	2	1	227	227	100	7	208	1e-100	369
1779	342886867	hypothetical protein FOXB_02893 [Fusarium oxysporum Fo5176]	EGU86564.1	100	319	0	0	1	319	319	100	1	319	1e-179	632
1780	584137866	hypothetical protein FVEG_07386 [Fusarium verticillioides 7600]	EWG47208.1	98.07	517	10	0	1	517	517	100	1	517	0	1053
1781	829114034	uncharacterized protein LW93_5916 [Fusarium fujikuroi]	KLO90451.1	93.94	743	26	1	1	743	743	100	1	724	0	1380
1782	584137868	hypothetical protein FVEG_07388 [Fusarium verticillioides 7600]	EWG47210.1	99.03	616	6	0	1	616	616	100	1	616	0	1270
1783	342886863	hypothetical protein FOXB_02889 [Fusarium oxysporum Fo5176]	EGU86560.1	99.02	205	2	0	1	205	205	100	1	205	1e-114	415
1784	475668546	Phosphatidylserine decarboxylase proenzyme 2, mitochondrial [Fusarium oxysporum f. sp. cubense race 4]	EMT66333.1	99.07	540	5	0	1	540	540	100	1	540	0	1108
1785	587678405	hypothetical protein FOYG_00524 [Fusarium oxysporum FOSC 3-a]	EWZ00723.1	88.76	765	29	4	1	710	710	100	1	763	0	1070
1787	342876352	hypothetical protein FOXB_11512 [Fusarium oxysporum Fo5176]	EGU77977.1	97.37	76	2	0	1	76	76	100	1	76	2e-35	150
1788	517312919	related to short-chain alcohol dehydrogenase [Fusarium fujikuroi IMI 58289]	CCT65169.1	96.78	311	10	0	1	311	311	100	1	311	1e-175	619
1789	591485055	hypothetical protein FOTG_16634 [Fusarium oxysporum f. sp. vasinfectum 25433]	EXM14973.1	73.61	269	54	2	1	252	254	99.2126	29	297	1e-104	382
1792	590050392	hypothetical protein FOQG_17382 [Fusarium oxysporum f. sp. raphani 54005]	EXK77916.1	82.22	180	22	2	1	171	172	99.4186	1	179	4e-80	300
1795	380492449	hypothetical protein CH063_01165 [Colletotrichum higginsianum]	CCF34593.1	64.34	129	46	0	6	134	149	86.5772	5	133	3e-43	176
1797	517321966	related to 26S proteasome-associated ubiquitin carboxyl-terminal hydrolase [Fusarium fujikuroi IMI 58289]	CCT73076.1	99.38	323	2	0	1	323	323	100	1	323	0	663
1798	517321965	related to purine transporter azgA [Fusarium fujikuroi IMI 58289]	CCT72324.1	90.45	618	12	1	1	571	571	100	1	618	0	1126
1799	584137875	hypothetical protein FVEG_07394 [Fusarium verticillioides 7600]	EWG47217.1	90.96	586	31	1	1	564	564	100	1	586	0	1095
1800	517321962	uncharacterized protein FFUJ_12175 [Fusarium fujikuroi IMI 58289]	CCT72321.1	75.26	679	168	0	1	679	679	100	1	679	0	1043
1801	584137878	hypothetical protein FVEG_07395 [Fusarium verticillioides 7600]	EWG47220.1	99.35	459	3	0	1	459	459	100	1	459	0	953
1802	517313144	related to seed maturation protein pm25 [Fusarium fujikuroi IMI 58289]	CCT65376.1	96.46	113	4	0	1	113	113	100	1	113	3e-54	213
1803	517313143	uncharacterized protein FFUJ_02314 [Fusarium fujikuroi IMI 58289]	CCT65375.1	95.59	136	6	0	1	136	136	100	1	136	2e-71	270
1804	587753400	hypothetical protein FOVG_03588 [Fusarium oxysporum f. sp. pisi HDV247]	EXA51116.1	64.55	519	183	1	2	520	520	99.8077	26	543	0	660
1809	591484200	hypothetical protein FOTG_17372 [Fusarium oxysporum f. sp. vasinfectum 25433]	EXM14214.1	86.61	224	30	0	2	225	225	99.5556	931	1154	2e-111	405
1810	342881016	hypothetical protein FOXB_07476, partial [Fusarium oxysporum Fo5176]	EGU82010.1	80.45	179	16	1	1	160	175	91.4286	1	179	4e-78	293
1811	591412615	hypothetical protein FOCG_11901 [Fusarium oxysporum f. sp. radicis-lycopersici 26381]	EXL47752.1	91.89	296	24	0	1	296	296	100	1	296	1e-141	505
1812	591412616	hypothetical protein FOCG_11902 [Fusarium oxysporum f. sp. radicis-lycopersici 26381]	EXL47753.1	83.45	145	2	1	1	123	123	100	1	145	6e-62	238
1815	902745306	hypothetical protein FOXG_14897 [Fusarium oxysporum f. sp. lycopersici 4287]	KNB16873.1	93.08	159	11	0	1	159	159	100	1	159	5e-83	308
1816	590025617	hypothetical protein FOMG_16023 [Fusarium oxysporum f. sp. melonis 26406]	EXK27475.1	96.04	227	9	0	8	234	234	97.0085	1	227	3e-128	461
1817	902745308	hypothetical protein FOXG_21822 [Fusarium oxysporum f. sp. lycopersici 4287]	KNB16875.1	89.78	372	6	1	1	372	372	100	1	340	0	671
1818	587675129	hypothetical protein FOYG_02296 [Fusarium oxysporum FOSC 3-a]	EWY97457.1	90.67	461	28	2	1	461	474	97.2574	1	446	0	863
1819	587702388	hypothetical protein FOZG_04457 [Fusarium oxysporum Fo47]	EWZ48993.1	95.44	812	19	1	1	794	794	100	1	812	0	1551
1820	587675127	hypothetical protein FOYG_02294 [Fusarium oxysporum FOSC 3-a]	EWY97455.1	99.35	155	1	0	1	155	155	100	225	379	2e-89	330
1821	587675125	hypothetical protein FOYG_02293 [Fusarium oxysporum FOSC 3-a]	EWY97453.1	67.81	146	45	2	1	145	164	88.4146	1	145	9e-40	165
1822	587675124	hypothetical protein FOYG_02292 [Fusarium oxysporum FOSC 3-a]	EWY97452.1	80.18	227	2	2	1	184	184	100	1	227	2e-97	357
1823	342887723	hypothetical protein FOXB_02321 [Fusarium oxysporum Fo5176]	EGU87161.1	97.62	126	3	0	1	126	127	99.2126	1	126	7e-68	258
1824	587702393	hypothetical protein FOZG_04462 [Fusarium oxysporum Fo47]	EWZ48998.1	88.7	664	37	3	1	626	626	100	1	664	0	1209
1825	587702394	hypothetical protein FOZG_04463 [Fusarium oxysporum Fo47]	EWZ48999.1	92.91	649	28	1	1	631	631	100	1	649	0	1250
1828	590025151	hypothetical protein FOMG_16447 [Fusarium oxysporum f. sp. melonis 26406]	EXK27009.1	93.24	74	5	0	1	74	76	97.3684	1	74	2e-30	134
1830	590025168	hypothetical protein FOMG_16464 [Fusarium oxysporum f. sp. melonis 26406]	EXK27026.1	86.45	214	6	1	1	191	191	100	1	214	2e-101	370
1831	590025169	hypothetical protein FOMG_16465 [Fusarium oxysporum f. sp. melonis 26406]	EXK27027.1	99.71	349	1	0	1	349	349	100	1	349	0	716
1834	590025170	hypothetical protein FOMG_16466 [Fusarium oxysporum f. sp. melonis 26406]	EXK27028.1	99.04	312	3	0	1	312	312	100	1	312	0	644
1835	517316717	related to 4-cresol dehydrogenase flavoprotein subunit [Fusarium fujikuroi IMI 58289]	CCT67978.1	98.57	70	1	0	1	70	70	100	1	70	1e-33	145
1836	584131889	hypothetical protein FVEG_03423 [Fusarium verticillioides 7600]	EWG41283.1	96.89	354	11	0	3	356	356	99.4382	2	355	0	665
1838	584131887	oxidoreductase [Fusarium verticillioides 7600]	EWG41281.1	94.29	210	12	0	1	210	211	99.5261	1	210	3e-112	407
1839	475672188	hypothetical protein FOC4_g10001338 [Fusarium oxysporum f. sp. cubense race 4]	EMT69384.1	87.96	540	39	1	1	514	515	99.8058	1	540	0	981
1840	587734454	hypothetical protein FOVG_16640 [Fusarium oxysporum f. sp. pisi HDV247]	EXA32170.1	93.79	628	39	0	1	628	628	100	1	628	0	1235
1841	590050687	hypothetical protein FOQG_17107 [Fusarium oxysporum f. sp. raphani 54005]	EXK78211.1	88.47	659	67	3	1	655	655	100	1	654	0	1232
1842	591420696	hypothetical protein FOCG_03560 [Fusarium oxysporum f. sp. radicis-lycopersici 26381]	EXL55833.1	94.14	631	37	0	1	631	631	100	17	647	0	1257
1843	587689764	hypothetical protein FOZG_10381 [Fusarium oxysporum Fo47]	EWZ36369.1	79.69	453	56	1	1	417	417	100	1	453	0	743
1844	587683274	hypothetical protein FOZG_16736 [Fusarium oxysporum Fo47]	EWZ29879.1	97.96	441	9	0	1	441	441	100	1	441	0	897
1845	591459825	hypothetical protein FOIG_15343 [Fusarium oxysporum f. sp. cubense tropical race 4 54006]	EXL91441.1	92.18	243	19	0	1	243	243	100	77	319	1e-134	482
1846	591460376	hypothetical protein FOIG_14858 [Fusarium oxysporum f. sp. cubense tropical race 4 54006]	EXL91975.1	87.29	1015	108	1	1	994	994	100	1	1015	0	1843
1847	590025245	hypothetical protein FOMG_16363 [Fusarium oxysporum f. sp. melonis 26406]	EXK27103.1	85.16	256	38	0	1	256	264	96.9697	1	256	1e-121	439
1848	591495150	cystathionine beta-lyase [Fusarium oxysporum f. sp. vasinfectum 25433]	EXM24682.1	90.29	412	25	1	80	476	476	83.4034	14	425	0	766
1849	751347580	hypothetical protein FAVG1_11257 [Fusarium avenaceum]	KIL85302.1	77.08	768	96	6	1	738	738	100	1	718	0	1180
1850	477515782	Putative dioxygenase subunit alpha yeaW [Fusarium oxysporum f. sp. cubense race 1]	ENH68093.1	94.48	417	23	0	1	417	417	100	1	417	0	844
1851	584131873	hypothetical protein FVEG_03409 [Fusarium verticillioides 7600]	EWG41267.1	93.39	499	7	2	1	473	473	100	44	542	0	934
1852	584131872	sarcosine oxidase [Fusarium verticillioides 7600]	EWG41266.1	96.36	220	8	0	1	220	220	100	159	378	3e-123	443
1853	584131871	hypothetical protein FVEG_03407 [Fusarium verticillioides 7600]	EWG41265.1	80.26	309	41	1	40	328	328	88.1098	23	331	1e-138	496
1854	590050167	hypothetical protein FOQG_17617 [Fusarium oxysporum f. sp. raphani 54005]	EXK77691.1	85.12	121	18	0	1	121	121	100	1	121	4e-52	206
1855	591405306	hypothetical protein FOCG_17065 [Fusarium oxysporum f. sp. radicis-lycopersici 26381]	EXL40443.1	72.13	366	59	3	1	323	323	100	191	556	2e-139	498
1856	902744994	hypothetical protein FOXG_14390 [Fusarium oxysporum f. sp. lycopersici 4287]	KNB16561.1	88.33	514	27	1	1	481	481	100	1	514	0	905
1857	590034872	hypothetical protein FOMG_09893 [Fusarium oxysporum f. sp. melonis 26406]	EXK36730.1	95.68	139	6	0	5	143	143	97.2028	78	216	1e-74	281
1858	587733616	hypothetical protein FOVG_17382 [Fusarium oxysporum f. sp. pisi HDV247]	EXA31332.1	97.24	362	10	0	1	362	362	100	153	514	0	746
1859	517316692	related to allantoate permease [Fusarium fujikuroi IMI 58289]	CCT67954.1	98.61	503	7	0	1	503	503	100	1	503	0	1015
1860	590025229	hypothetical protein FOMG_16350 [Fusarium oxysporum f. sp. melonis 26406]	EXK27087.1	87.47	463	58	0	1	463	490	94.4898	1	463	0	855
1861	584131866	hypothetical protein FVEG_03402 [Fusarium verticillioides 7600]	EWG41260.1	93.64	472	17	1	1	459	459	100	1	472	0	872
1862	584131865	hypothetical protein FVEG_03401 [Fusarium verticillioides 7600]	EWG41259.1	94.21	242	14	0	2	243	243	99.5885	242	483	3e-126	454
1863	591495163	hypothetical protein FOTG_08189 [Fusarium oxysporum f. sp. vasinfectum 25433]	EXM24695.1	92.68	246	18	0	1	246	248	99.1935	1	246	3e-133	477
1864	584131864	gentisate 1,2-dioxygenase [Fusarium verticillioides 7600]	EWG41258.1	95.97	347	14	0	1	347	347	100	1	347	0	695
1865	584131863	salicylate hydroxylase [Fusarium verticillioides 7600]	EWG41257.1	96.13	465	18	0	1	465	465	100	1	465	0	930
1866	590048940	hypothetical protein FOQG_18798 [Fusarium oxysporum f. sp. raphani 54005]	EXK76464.1	95.76	448	19	0	1	448	448	100	1	448	0	869
1867	1040022259	hypothetical protein FPOA_13957 [Fusarium poae]	OBS15154.1	84.19	740	115	1	1	738	738	100	1	740	0	1294
1868	590051832	hypothetical protein FOQG_16009 [Fusarium oxysporum f. sp. raphani 54005]	EXK79356.1	74.86	704	153	4	1	681	684	99.5614	1	703	0	1011
1869	587733599	hypothetical protein FOVG_17368 [Fusarium oxysporum f. sp. pisi HDV247]	EXA31315.1	70.97	496	78	4	1	430	432	99.537	1	496	0	701
1870	517316720	uncharacterized protein FFUJ_06732 [Fusarium fujikuroi IMI 58289]	CCT67981.1	72.43	185	51	0	32	216	218	84.8624	16	200	2e-76	288
1871	475672149	Carotenoid 9,10(9',10')-cleavage dioxygenase [Fusarium oxysporum f. sp. cubense race 4]	EMT69345.1	99.49	588	3	0	1	588	588	100	1	588	0	1210
1872	587667480	hypothetical protein FOYG_07475 [Fusarium oxysporum FOSC 3-a]	EWY89821.1	94.98	319	15	1	1	318	318	100	1	319	3e-179	630
1873	590055875	hypothetical protein FOQG_12412 [Fusarium oxysporum f. sp. raphani 54005]	EXK83399.1	77.6	558	47	3	1	480	483	99.3789	1	558	0	857
1874	587733588	hypothetical protein FOVG_17357 [Fusarium oxysporum f. sp. pisi HDV247]	EXA31304.1	91.33	196	17	0	1	196	196	100	318	513	8e-95	349
1875	590055873	hypothetical protein FOQG_12410 [Fusarium oxysporum f. sp. raphani 54005]	EXK83397.1	90.85	142	13	0	1	142	142	100	119	260	2e-69	263
1877	584131855	hypothetical protein FVEG_03392 [Fusarium verticillioides 7600]	EWG41249.1	94.8	327	17	0	1	327	327	100	1	327	0	665
1878	829119243	uncharacterized protein LW93_7984 [Fusarium fujikuroi]	KLO95444.1	91.81	781	24	2	1	741	741	100	1	781	0	1480
1879	517316728	related to fumarylacetoacetate hydralase [Fusarium fujikuroi IMI 58289]	CCT67989.1	96.62	296	10	0	1	296	296	100	1	296	2e-164	582
1880	517316729	probable cutinase precursor [Fusarium fujikuroi IMI 58289]	CCT67990.1	96.58	234	8	0	1	234	234	100	1	234	2e-127	457
1883	584131848	hypothetical protein FVEG_03388 [Fusarium verticillioides 7600]	EWG41242.1	90.15	325	32	0	1	325	327	99.3884	521	845	2e-179	631
1884	584131847	hypothetical protein FVEG_03387 [Fusarium verticillioides 7600]	EWG41241.1	86.02	601	39	2	1	576	576	100	1	581	0	1063
1885	829110799	putative endopeptidase K [Fusarium fujikuroi]	KLO87318.1	86.92	413	54	0	1	413	413	100	1	413	0	735
1886	584131845	hypothetical protein FVEG_15256 [Fusarium verticillioides 7600]	EWG41239.1	91.35	474	26	2	1	460	460	100	1	473	0	860
1887	829119250	bikaverin cluster-efflux pump [Fusarium fujikuroi]	KLO95451.1	78.09	397	64	5	13	386	386	96.8912	47	443	4e-156	554
1888	591495199	hypothetical protein FOTG_08221 [Fusarium oxysporum f. sp. vasinfectum 25433]	EXM24731.1	96.8	750	22	2	1	748	748	100	1	750	0	1477
1889	517316734	bikaverin cluster-transcription factor enhancer [Fusarium fujikuroi IMI 58289]	CCT67994.1	97.24	326	9	0	1	326	326	100	1	326	0	647
1890	584131841	hypothetical protein FVEG_03381 [Fusarium verticillioides 7600]	EWG41235.1	95.28	445	13	1	1	437	520	84.0385	1	445	0	877
1891	590055853	hypothetical protein FOQG_12394 [Fusarium oxysporum f. sp. raphani 54005]	EXK83377.1	97.3	222	6	0	1	222	228	97.3684	1	222	2e-124	447
1892	584131840	hypothetical protein FVEG_03380 [Fusarium verticillioides 7600]	EWG41234.1	94.74	266	14	0	5	270	270	98.5185	224	489	2e-136	488
1893	957801476	putative polyketide synthase [Fusarium thapsinum]	ALQ33037.1	95.04	2036	92	2	1	2028	2028	100	1	2035	0	3984
1894	587732737	ATPase [Fusarium oxysporum f. sp. pisi HDV247]	EXA30453.1	90.54	148	14	0	1	148	148	100	1331	1478	7e-79	295
1895	587732738	hypothetical protein FOVG_18154 [Fusarium oxysporum f. sp. pisi HDV247]	EXA30454.1	79.95	419	80	2	10	424	446	93.0493	56	474	0	694
1896	255937025	Pc13g11210 [Penicillium rubens Wisconsin 54-1255]	XP_002559539.1	67.98	253	81	0	1	253	254	99.6063	1	253	1e-99	365
1898	584131835	hypothetical protein FVEG_03375 [Fusarium verticillioides 7600]	EWG41229.1	96.91	550	17	0	1	550	570	96.4912	1	550	0	1080
1899	829125544	D-amino acid hydantoin hydrolase (hydantoinase) [Fusarium fujikuroi]	KLP00867.1	89.63	993	43	3	1	933	933	100	1	993	0	1793
1900	477515852	hypothetical protein FOC1_g10003794 [Fusarium oxysporum f. sp. cubense race 1]	ENH68163.1	87.54	305	38	0	1	305	306	99.6732	1	305	1e-144	515
1901	584131817	hypothetical protein FVEG_03361 [Fusarium verticillioides 7600]	EWG41211.1	90.04	261	22	1	1	261	261	100	1	257	5e-132	473
1902	590036613	hypothetical protein FOMG_06053 [Fusarium oxysporum f. sp. melonis 26406]	EXK38471.1	78.58	607	85	3	14	595	595	97.8151	169	755	0	969
1903	475672118	Leptomycin B resistance protein pmd1 [Fusarium oxysporum f. sp. cubense race 4]	EMT69314.1	90.05	1246	105	1	1	1227	1228	99.9186	28	1273	0	2290
1904	829119274	putative rhamnogalacturonase A precursor [Fusarium fujikuroi]	KLO95475.1	88.65	520	45	2	1	507	517	98.0658	1	519	0	952
1905	829119273	Uncharacterized protein LW93_8014 [Fusarium fujikuroi]	KLO95474.1	94.28	332	18	1	1	331	331	100	1	332	0	644
1906	587657617	hypothetical protein FOYG_16809 [Fusarium oxysporum FOSC 3-a]	EWY80010.1	64.87	316	110	1	1	315	316	99.6835	1	316	2e-120	435
1909	587689843	hypothetical protein FOZG_10452 [Fusarium oxysporum Fo47]	EWZ36448.1	90.88	340	31	0	1	340	341	99.7067	1	340	1e-177	625
1910	517316752	related to cytochrome p450 [Fusarium fujikuroi IMI 58289]	CCT68011.1	89.32	384	41	0	1	384	385	99.7403	134	517	0	728
1911	517316751	uncharacterized protein FFUJ_06762 [Fusarium fujikuroi IMI 58289]	CCT68010.1	96.13	723	28	0	1	723	808	89.4802	1	723	0	1401
1912	584131828	hypothetical protein FVEG_15254 [Fusarium verticillioides 7600]	EWG41222.1	98.04	204	4	0	1	204	204	100	1	204	2e-114	414
1913	829119263	uncharacterized protein LW93_8004 [Fusarium fujikuroi]	KLO95464.1	86.84	228	11	1	1	209	209	100	1	228	7e-110	399
1914	584131830	hypothetical protein FVEG_03371 [Fusarium verticillioides 7600]	EWG41224.1	85.04	655	98	0	1	655	656	99.8476	1	655	0	1174
1915	584131831	hypothetical protein FVEG_03372 [Fusarium verticillioides 7600]	EWG41225.1	92.04	113	9	0	1	113	113	100	1	113	2e-54	214
1916	584131832	hypothetical protein FVEG_03373 [Fusarium verticillioides 7600]	EWG41226.1	65.87	378	97	2	1	346	346	100	1	378	3e-137	491
1917	584131833	hypothetical protein FVEG_15255 [Fusarium verticillioides 7600]	EWG41227.1	80.19	520	103	0	12	531	533	97.561	12	531	0	868
1918	584131816	hypothetical protein FVEG_03360 [Fusarium verticillioides 7600]	EWG41210.1	85.76	309	40	1	1	305	305	100	80	388	1e-145	519
1919	829119278	uncharacterized protein LW93_8019 [Fusarium fujikuroi]	KLO95479.1	85.41	658	96	0	1	658	658	100	1	658	0	1167
1920	829119279	uncharacterized protein LW93_8020 [Fusarium fujikuroi]	KLO95480.1	74.62	264	37	4	1	234	234	100	1	264	6e-99	363
1921	475672098	Putative transcriptional regulatory protein C3C7.04 [Fusarium oxysporum f. sp. cubense race 4]	EMT69294.1	76.37	584	114	3	25	584	587	95.4003	29	612	0	899
1922	517316769	probable chaperone protein hchA [Fusarium fujikuroi IMI 58289]	CCT68025.1	99.32	295	2	0	1	295	295	100	1	295	4e-171	603
1923	829110767	Uncharacterized protein Y057_1783 [Fusarium fujikuroi]	KLO87286.1	96.75	308	5	1	1	303	303	100	1	308	4e-165	583
1924	517316771	related to oxidoreductase [Fusarium fujikuroi IMI 58289]	CCT68027.1	89.52	353	37	0	1	353	353	100	1	353	0	648
1925	342887459	hypothetical protein FOXB_02525 [Fusarium oxysporum Fo5176]	EGU86955.1	82.05	234	14	1	1	206	206	100	1	234	2e-106	387
1926	590036649	hypothetical protein FOMG_06083 [Fusarium oxysporum f. sp. melonis 26406]	EXK38507.1	74.43	833	138	6	1	760	766	99.2167	1	831	0	1251
1927	584131804	hypothetical protein FVEG_03349 [Fusarium verticillioides 7600]	EWG41198.1	73.35	638	154	2	1	638	638	100	538	1159	0	975
1928	829121737	uncharacterized protein Y057_10577 [Fusarium fujikuroi]	KLO97736.1	86.47	510	60	1	1	501	501	100	1	510	0	915
1932	662528197	hypothetical protein M438DRAFT_317292 [Aureobasidium pullulans EXF-150]	KEQ85575.1	73.19	552	148	0	46	597	597	92.4623	21	572	0	868
1933	662528198	hypothetical protein M438DRAFT_334459 [Aureobasidium pullulans EXF-150]	KEQ85576.1	69.95	193	56	2	2	194	195	98.9744	6	196	3e-80	300
1934	662528199	MFS general substrate transporter [Aureobasidium pullulans EXF-150]	KEQ85577.1	67.74	530	154	6	6	525	533	97.561	5	527	0	738
1937	587746350	hypothetical protein FOVG_05571 [Fusarium oxysporum f. sp. pisi HDV247]	EXA44066.1	84.97	519	73	1	1	514	593	86.6779	1	519	0	904
1938	584131784	hypothetical protein FVEG_03334 [Fusarium verticillioides 7600]	EWG41178.1	82.85	519	36	2	15	480	505	92.2772	15	533	0	861
1941	584131788	hypothetical protein FVEG_03338 [Fusarium verticillioides 7600]	EWG41182.1	95.17	435	16	2	1	434	434	100	1	431	0	834
1942	584131789	hypothetical protein FVEG_15243 [Fusarium verticillioides 7600]	EWG41183.1	90.24	369	34	1	1	369	370	99.7297	1	367	0	681
1943	590036660	succinate-semialdehyde dehydrogenase [Fusarium oxysporum f. sp. melonis 26406]	EXK38518.1	96.59	499	17	0	1	499	499	100	1	499	0	981
1944	587667555	3-oxoacyl-[acyl-carrier protein] reductase [Fusarium oxysporum FOSC 3-a]	EWY89896.1	98.8	250	3	0	1	250	250	100	1	250	6e-144	513
1945	829119298	putative 3-isopropylmalate dehydrogenase beta [Fusarium fujikuroi]	KLO95499.1	97.38	382	10	0	1	382	382	100	1	382	0	751
1946	591467445	hypothetical protein FOIG_09549 [Fusarium oxysporum f. sp. cubense tropical race 4 54006]	EXL98827.1	72.56	645	104	6	1	573	573	100	1	644	0	904
1947	829119300	decarboxylase DEC1 [Fusarium fujikuroi]	KLO95501.1	93.12	247	17	0	1	247	247	100	1	247	4e-133	477
1948	517316788	ADH2-Alcohol dehydrogenase II [Fusarium fujikuroi IMI 58289]	CCT68044.1	90.88	329	30	0	1	329	329	100	1	329	1e-164	582
1949	517316789	uncharacterized protein FFUJ_06800 [Fusarium fujikuroi IMI 58289]	CCT68045.1	81.31	717	41	5	1	638	651	98.0031	1	703	0	1058
1950	591495255	hypothetical protein FOTG_08275 [Fusarium oxysporum f. sp. vasinfectum 25433]	EXM24787.1	89.21	658	19	2	1	606	606	100	1	658	0	1111
1951	829121754	uncharacterized protein Y057_10594 [Fusarium fujikuroi]	KLO97753.1	72.38	210	57	1	1	209	209	100	218	427	2e-84	314
1952	584131798	hypothetical protein FVEG_03346 [Fusarium verticillioides 7600]	EWG41192.1	99.24	132	1	0	1	132	132	100	1	132	1e-67	258
1954	584131800	hypothetical protein FVEG_15246 [Fusarium verticillioides 7600]	EWG41194.1	95.38	130	5	1	1	130	130	100	1	129	4e-65	249
1955	584131801	hypothetical protein FVEG_03347 [Fusarium verticillioides 7600]	EWG41195.1	92	400	20	2	1	388	481	80.6653	1	400	0	752
1956	584131802	catalase [Fusarium verticillioides 7600]	EWG41196.1	96.52	374	13	0	1	374	374	100	1	374	0	741
1958	927758486	riboflavin transporter mch5 [Fusarium langsethiae]	KPA41670.1	62.86	315	97	5	1	299	299	100	1	311	2e-104	382
1961	829112766	putative homogentisate 1,2-dioxygenase [Fusarium fujikuroi]	KLO89214.1	95.5	533	11	1	1	520	520	100	2	534	0	1065
1962	584131759	3-carboxy-cis,cis-muconate cycloisomerase [Fusarium verticillioides 7600]	EWG41153.1	97.15	421	12	0	2	422	438	96.1187	60	480	0	842
1963	517316822	probable succinyl-CoA:3-ketoacid-coenzyme A transferase, mitochondrial precursor [Fusarium fujikuroi IMI 58289]	CCT68073.1	92.09	506	20	1	1	486	486	100	1	506	0	948
1964	584131761	hypothetical protein FVEG_03314 [Fusarium verticillioides 7600]	EWG41155.1	97.24	434	12	0	1	434	434	100	1	434	0	868
1965	829112770	putative acetyl-CoA C-acyltransferase precursor [Fusarium fujikuroi]	KLO89218.1	81.77	395	31	1	1	354	354	100	1	395	0	650
1966	591495280	alcohol dehydrogenase [Fusarium oxysporum f. sp. vasinfectum 25433]	EXM24812.1	92.31	416	32	0	1	416	416	100	1	416	0	789
1967	517316818	related to HOL1, putative substrate-H+ antiporter [Fusarium fujikuroi IMI 58289]	CCT68069.1	88.07	545	21	2	1	501	501	100	1	545	0	944
1968	584131765	hypothetical protein FVEG_03317 [Fusarium verticillioides 7600]	EWG41159.1	80.84	1096	171	3	1	1057	1059	99.8111	266	1361	0	1762
1969	517316816	related to potential drug facilitator PEP5 [Fusarium fujikuroi IMI 58289]	CCT68068.1	95.54	605	12	1	1	590	590	100	1	605	0	1156
1970	517316815	related to salicylate hydroxylase [Fusarium fujikuroi IMI 58289]	CCT68067.1	92.75	455	13	2	1	435	435	100	1	455	0	824
1971	590053807	hypothetical protein FOQG_14194 [Fusarium oxysporum f. sp. raphani 54005]	EXK81331.1	82.45	530	88	1	14	538	538	97.5836	7	536	0	905
1972	591420848	hypothetical protein FOCG_03699 [Fusarium oxysporum f. sp. radicis-lycopersici 26381]	EXL55985.1	91.88	345	28	0	1	345	345	100	1	345	0	660
1973	591495270	hypothetical protein FOTG_08290 [Fusarium oxysporum f. sp. vasinfectum 25433]	EXM24802.1	73.55	968	240	2	1	954	954	100	393	1358	0	1465
1975	591495269	hypothetical protein FOTG_08289 [Fusarium oxysporum f. sp. vasinfectum 25433]	EXM24801.1	85.28	265	39	0	1	265	267	99.2509	1	265	2e-116	421
1976	342889717	hypothetical protein FOXB_00783 [Fusarium oxysporum Fo5176]	EGU88698.1	97.79	271	6	0	1	271	271	100	1	271	7e-149	529
1977	587681871	hypothetical protein FOZG_17788 [Fusarium oxysporum Fo47]	EWZ28476.1	87.29	181	19	1	1	177	177	100	1	181	3e-67	257
1978	590026625	phospholipase A2 [Fusarium oxysporum f. sp. melonis 26406]	EXK28483.1	91.79	633	52	0	1	633	633	100	1	633	0	1186
1979	590053972	hypothetical protein FOQG_14132 [Fusarium oxysporum f. sp. raphani 54005]	EXK81496.1	87.28	519	66	0	120	638	638	81.348	75	593	0	940
1980	591459284	hypothetical protein FOIG_15831 [Fusarium oxysporum f. sp. cubense tropical race 4 54006]	EXL90931.1	85.45	220	26	1	15	228	228	93.8596	50	269	8e-108	392
1981	517316843	uncharacterized protein FFUJ_06854 [Fusarium fujikuroi IMI 58289]	CCT68091.1	60.08	248	52	1	1	248	248	100	1	201	1e-75	286
1982	584131755	hypothetical protein FVEG_03308 [Fusarium verticillioides 7600]	EWG41149.1	97.8	227	5	0	1	227	227	100	1	227	4e-126	453
1983	517316845	related to ankyrin 3 [Fusarium fujikuroi IMI 58289]	CCT68093.1	60.38	997	333	12	1	940	940	100	1	992	0	1155
1984	358385346	hypothetical protein TRIVIDRAFT_71116 [Trichoderma virens Gv29-8]	EHK22943.1	62.12	594	141	6	1	511	511	100	1	593	0	677
1985	587746399	hypothetical protein FOVG_05619 [Fusarium oxysporum f. sp. pisi HDV247]	EXA44115.1	68.92	251	54	4	1	231	232	99.569	1	247	1e-81	305
1986	584131749	hypothetical protein FVEG_03304 [Fusarium verticillioides 7600]	EWG41143.1	94.76	1489	72	2	1	1486	1486	100	1	1486	0	2849
1987	517316856	uncharacterized protein FFUJ_06867 [Fusarium fujikuroi IMI 58289]	CCT68104.1	78.3	530	83	2	1	530	538	98.513	2	499	0	880
1988	584131747	hypothetical protein FVEG_03302 [Fusarium verticillioides 7600]	EWG41141.1	92.75	510	18	1	1	491	491	100	1	510	0	946
1989	584131746	hypothetical protein FVEG_03301 [Fusarium verticillioides 7600]	EWG41140.1	97.19	499	12	2	1	497	497	100	1	499	0	961
1990	829131003	uncharacterized protein Y057_9240 [Fusarium fujikuroi]	KLP05337.1	92.93	382	25	1	1	380	380	100	1	382	0	713
1991	596547213	hypothetical protein FG05_04809 [Fusarium graminearum]	EYB27090.1	69.88	488	145	2	13	498	502	96.8127	48	535	0	738
1992	751745657	hypothetical protein OIDMADRAFT_45982 [Oidiodendron maius Zn]	KIM93851.1	83.39	313	52	0	1	313	313	100	1	313	2e-148	528
1996	475665232	Cytochrome P450 1A1 [Fusarium oxysporum f. sp. cubense race 4]	EMT63024.1	86.96	575	18	2	1	518	518	100	1	575	0	1009
1997	587746411	hypothetical protein FOVG_05630 [Fusarium oxysporum f. sp. pisi HDV247]	EXA44127.1	93.77	321	20	0	1	321	326	98.4663	1	321	3e-176	620
1998	902730083	hypothetical protein FOXG_04851 [Fusarium oxysporum f. sp. lycopersici 4287]	KNB01652.1	92.02	238	19	0	1	238	238	100	4	241	7e-130	466
2000	591495329	hypothetical protein FOTG_08340 [Fusarium oxysporum f. sp. vasinfectum 25433]	EXM24861.1	88.26	213	25	0	1	213	213	100	1	213	1e-105	385
2001	829129796	Uncharacterized protein Y057_7705 [Fusarium fujikuroi]	KLP04393.1	82.46	496	81	1	1	496	496	100	1	490	0	849
2002	829112729	uncharacterized protein LW93_12598 [Fusarium fujikuroi]	KLO89177.1	92.69	219	16	0	1	219	219	100	1	219	8e-115	416
2003	584131733	hypothetical protein FVEG_15233 [Fusarium verticillioides 7600]	EWG41127.1	79.75	79	16	0	1	79	84	94.0476	1	79	4e-28	126
2004	587719435	hypothetical protein FOWG_08346 [Fusarium oxysporum f. sp. lycopersici MN25]	EWZ90772.1	84.34	479	75	0	29	507	507	94.4773	84	562	0	830
2005	590053277	hypothetical protein FOQG_14744 [Fusarium oxysporum f. sp. raphani 54005]	EXK80801.1	82.48	548	94	2	108	653	653	83.6141	122	669	0	914
2009	584131729	hypothetical protein FVEG_03289 [Fusarium verticillioides 7600]	EWG41123.1	67.57	111	33	1	18	125	125	86.4	117	227	5e-32	139
2011	517316867	related to phenazine biosynthesis protein phzC [Fusarium fujikuroi IMI 58289]	CCT68114.1	92.31	312	24	0	1	312	312	100	1	312	6e-173	610
2012	829129789	uncharacterized protein Y057_7698 [Fusarium fujikuroi]	KLP04386.1	65.85	571	193	2	1	570	570	100	1	570	0	783
2013	584131725	hypothetical protein FVEG_03285 [Fusarium verticillioides 7600]	EWG41119.1	87.68	406	48	1	1	406	406	100	1	404	0	728
2014	517316870	uncharacterized protein FFUJ_06881 [Fusarium fujikuroi IMI 58289]	CCT68117.1	95	300	15	0	1	300	300	100	1	300	4e-164	580
2015	590036749	hypothetical protein FOMG_06172 [Fusarium oxysporum f. sp. melonis 26406]	EXK38607.1	86.92	474	59	2	1	472	472	100	1	473	0	865
2016	584131722	hypothetical protein FVEG_03282 [Fusarium verticillioides 7600]	EWG41116.1	93.55	124	8	0	1	124	124	100	1	124	4e-63	243
2018	475665248	Heterokaryon incompatibility protein 6, OR allele [Fusarium oxysporum f. sp. cubense race 4]	EMT63040.1	77.09	633	115	4	2	604	612	98.5294	19	651	0	987
2019	587719425	alpha-glucosidase [Fusarium oxysporum f. sp. lycopersici MN25]	EWZ90762.1	97.69	606	14	0	1	606	606	100	1	606	0	1234
2020	829112716	putative maltose permease (MalP) [Fusarium fujikuroi]	KLO89164.1	95.54	538	7	1	1	521	521	100	1	538	0	1051
2021	475665251	Putative sucrose utilization protein SUC1 [Fusarium oxysporum f. sp. cubense race 4]	EMT63043.1	99.77	444	1	0	1	444	445	99.7753	1	444	0	910
2022	477515064	Putative L-asparaginase 3 [Fusarium oxysporum f. sp. cubense race 1]	ENH67420.1	98.64	369	5	0	1	369	369	100	1	369	0	749
2023	584131711	hypothetical protein FVEG_03276 [Fusarium verticillioides 7600]	EWG41105.1	86.18	152	21	0	2	153	154	98.7013	7	158	4e-73	276
2024	584131710	serine/threonine protein kinase [Fusarium verticillioides 7600]	EWG41104.1	97.14	350	10	0	1	350	350	100	1	350	0	689
2025	590053263	hypothetical protein FOQG_14730 [Fusarium oxysporum f. sp. raphani 54005]	EXK80787.1	91.34	889	52	4	1	865	865	100	1	888	0	1453
2026	590053262	hypothetical protein FOQG_14729 [Fusarium oxysporum f. sp. raphani 54005]	EXK80786.1	63.93	671	223	3	17	668	668	97.6048	16	686	0	830
2028	517316881	related to heterokaryon incompatibility protein (het-6OR allele) [Fusarium fujikuroi IMI 58289]	CCT68128.1	81.1	672	121	3	1	666	697	95.5524	1	672	0	1134
2031	584131707	hypothetical protein FVEG_03272 [Fusarium verticillioides 7600]	EWG41101.1	96.64	744	25	0	1	744	745	99.8658	1	744	0	1508
2032	517316883	uncharacterized protein FFUJ_06894 [Fusarium fujikuroi IMI 58289]	CCT68130.1	79.09	110	15	1	1	110	110	100	1	102	6e-43	176
2033	584131704	hypothetical protein FVEG_03270 [Fusarium verticillioides 7600]	EWG41098.1	81.18	473	81	2	1	465	465	100	1	473	0	800
2035	590036763	hypothetical protein FOMG_06186 [Fusarium oxysporum f. sp. melonis 26406]	EXK38621.1	98.3	528	9	0	1	528	528	100	7	534	0	1063
2036	829112701	esterase/lipase [Fusarium fujikuroi]	KLO89149.1	93.41	364	24	0	1	364	364	100	1	364	0	718
2037	829129802	putative D-amino-acid oxidase [Fusarium fujikuroi]	KLP04399.1	96.07	280	11	0	1	280	299	93.6455	1	280	7e-162	573
2038	477515074	Putative transcriptional regulatory protein C25B8.11 [Fusarium oxysporum f. sp. cubense race 1]	ENH67430.1	85.17	634	94	0	1	634	634	100	1	634	0	1134
2040	829145922	uncharacterized protein LW94_6910 [Fusarium fujikuroi]	KLP16359.1	89.88	563	57	0	1	563	563	100	1	563	0	1063
2041	477515075	Vegetative incompatibility protein HET-E-1 [Fusarium oxysporum f. sp. cubense race 1]	ENH67431.1	72.56	492	113	2	1	470	470	100	91	582	0	733
2043	751348474	hypothetical protein FAVG1_10593 [Fusarium avenaceum]	KIL86196.1	80.53	339	66	0	1	339	340	99.7059	1	339	5e-162	573
2044	584131696	hypothetical protein FVEG_03264 [Fusarium verticillioides 7600]	EWG41090.1	89.14	893	65	1	1	861	861	100	1	893	0	1651
2045	829112379	uncharacterized protein LW93_12240 [Fusarium fujikuroi]	KLO88827.1	88.44	147	17	0	4	150	165	89.0909	24	170	3e-69	263
2046	829112380	dehydroshikimate dehydratase [Fusarium fujikuroi]	KLO88828.1	92.98	342	13	1	1	331	331	100	1	342	1e-180	635
2047	829112381	Uncharacterized protein LW93_12242 [Fusarium fujikuroi]	KLO88829.1	97.9	523	11	0	1	523	523	100	1	523	0	1062
2048	517316898	related to ascus development protein 3 [Fusarium fujikuroi IMI 58289]	CCT68144.1	98.99	497	5	0	1	497	497	100	1	497	0	1005
2049	517316899	uncharacterized protein FFUJ_06910 [Fusarium fujikuroi IMI 58289]	CCT68145.1	96.15	390	15	0	1	390	390	100	1	390	0	780
2050	829112384	uncharacterized protein LW93_12245 [Fusarium fujikuroi]	KLO88832.1	80.13	156	30	1	5	160	160	97.5	21	175	7e-66	251
2052	477515084	hypothetical protein FOC1_g10010712, partial [Fusarium oxysporum f. sp. cubense race 1]	ENH67440.1	88.76	534	35	1	1	509	509	100	107	640	0	979
2053	475665274	hypothetical protein FOC4_g10013270 [Fusarium oxysporum f. sp. cubense race 4]	EMT63066.1	91.89	456	13	1	1	432	432	100	1	456	0	858
2054	584131683	hypothetical protein FVEG_03253 [Fusarium verticillioides 7600]	EWG41077.1	78.85	695	131	3	1	679	679	100	1	695	0	1115
2055	587746464	hypothetical protein FOVG_05681 [Fusarium oxysporum f. sp. pisi HDV247]	EXA44180.1	96.34	738	21	3	1	735	735	100	1	735	0	1393
2056	517316910	related to sodium/nucleoside cotransporter 1 [Fusarium fujikuroi IMI 58289]	CCT68155.1	92.04	653	11	3	1	615	615	100	1	650	0	1175
2057	584131680	hypothetical protein FVEG_03249 [Fusarium verticillioides 7600]	EWG41074.1	97.5	3205	57	3	1	3182	3182	100	1	3205	0	6323
2058	587667680	hypothetical protein FOYG_07657 [Fusarium oxysporum FOSC 3-a]	EWY90021.1	93.45	458	26	1	1	458	499	91.7836	1	454	0	755
2059	584131675	hypothetical protein FVEG_03247 [Fusarium verticillioides 7600]	EWG41069.1	96.47	878	6	1	1	853	853	100	1	878	0	1486
2060	949386758	putative 40s ribosomal protein s22 [Rosellinia necatrix]	GAP90326.1	88.89	126	14	0	1	126	128	98.4375	1	126	5e-61	235
2061	590036792	hypothetical protein FOMG_06210 [Fusarium oxysporum f. sp. melonis 26406]	EXK38650.1	99.11	787	7	0	1	787	787	100	1	787	0	1596
2062	584131671	subtilisin [Fusarium verticillioides 7600]	EWG41065.1	98.48	396	6	0	1	396	396	100	1	396	0	802
2063	591442677	hypothetical protein FOPG_09765 [Fusarium oxysporum f. sp. conglutinans race 2 54008]	EXL75268.1	96.85	1015	31	1	1	1014	1014	100	1	1015	0	1875
2064	475665283	Extragenic suppressor of kinetochore protein 1 [Fusarium oxysporum f. sp. cubense race 4]	EMT63075.1	99.52	209	1	0	32	240	240	87.0833	925	1133	6e-117	423
2065	829112401	non-ribosomal peptide synthetase [Fusarium fujikuroi]	KLO88849.1	91.35	2473	91	8	1	2350	2350	100	1	2473	0	4554
2066	517316919	related to sexual differentiation process protein isp4 [Fusarium fujikuroi IMI 58289]	CCT68164.1	93.05	878	7	3	1	826	826	100	1	876	0	1634
2067	517316921	related to short-chain dehydrogenase/reductase family protein, putative [Fusarium fujikuroi IMI 58289]	CCT68166.1	93.22	339	23	0	1	339	339	100	1	339	0	643
2068	829112404	uncharacterized protein LW93_12267 [Fusarium fujikuroi]	KLO88852.1	86.84	532	53	3	1	518	518	100	1	529	0	937
2071	584131659	hypothetical protein FVEG_03239 [Fusarium verticillioides 7600]	EWG41053.1	98.6	572	8	0	1	572	572	100	49	620	0	1162
2072	477515102	Tyrosine-protein phosphatase YVH1 [Fusarium oxysporum f. sp. cubense race 1]	ENH67458.1	98.3	411	7	0	66	476	476	86.3445	40	450	0	839
2074	829112408	Uncharacterized protein LW93_12271 [Fusarium fujikuroi]	KLO88856.1	87.1	186	22	1	1	184	184	100	1	186	1e-59	232
2075	584131652	hypothetical protein FVEG_03236 [Fusarium verticillioides 7600]	EWG41046.1	84.93	531	39	2	1	501	501	100	44	563	0	771
2076	584131651	hypothetical protein FVEG_03235 [Fusarium verticillioides 7600]	EWG41045.1	70.81	161	47	0	1	161	164	98.1707	1	161	5e-55	216
2077	342875403	hypothetical protein FOXB_12327 [Fusarium oxysporum Fo5176]	EGU77179.1	87.5	104	1	1	1	104	104	100	1	92	5e-45	182
2078	584131649	hypothetical protein FVEG_03233 [Fusarium verticillioides 7600]	EWG41043.1	98.4	1001	16	0	1	1001	1050	95.3333	1	1001	0	2046
2079	584131648	hypothetical protein FVEG_03232 [Fusarium verticillioides 7600]	EWG41042.1	95.65	207	9	0	1	207	207	100	1	207	3e-115	417
2080	591420976	serine/threonine protein kinase [Fusarium oxysporum f. sp. radicis-lycopersici 26381]	EXL56113.1	84.46	1326	197	4	1	1318	1318	100	1	1325	0	2328
2081	584131645	alcohol dehydrogenase [Fusarium verticillioides 7600]	EWG41039.1	94.19	344	20	0	1	344	344	100	1	344	0	675
2082	517316936	uncharacterized protein FFUJ_06947 [Fusarium fujikuroi IMI 58289]	CCT68178.1	97.89	285	6	0	1	285	285	100	1	285	3e-163	577
2083	829122694	monocarboxylate transporter 2 [Fusarium fujikuroi]	KLO98545.1	98.88	448	5	0	1	448	448	100	1	448	0	892
2084	584131642	hypothetical protein FVEG_03225 [Fusarium verticillioides 7600]	EWG41036.1	95.35	645	29	1	1	645	645	100	1	644	0	1287
2085	517316939	uncharacterized protein FFUJ_06950 [Fusarium fujikuroi IMI 58289]	CCT68181.1	71.99	632	149	2	1	604	613	98.5318	1	632	0	917
2086	517316940	probable F-box/WD-repeat protein [Fusarium fujikuroi IMI 58289]	CCT68182.1	97.39	958	25	0	1	958	958	100	1	958	0	1767
2087	342874616	hypothetical protein FOXB_12911 [Fusarium oxysporum Fo5176]	EGU76612.1	98.58	212	3	0	1	212	212	100	1	212	2e-117	424
2088	584131638	hypothetical protein FVEG_03221 [Fusarium verticillioides 7600]	EWG41032.1	88.81	1367	98	9	1	1320	1320	100	1	1359	0	2292
2094	829143173	uncharacterized protein LW94_1273 [Fusarium fujikuroi]	KLP14619.1	98.21	616	8	1	1	613	613	100	1	616	0	1148
2095	587690066	argininosuccinate lyase [Fusarium oxysporum Fo47]	EWZ36671.1	62.75	51	18	1	12	61	62	80.6452	51	101	4e-07	56.6
2096	587719327	hypothetical protein FOWG_08259 [Fusarium oxysporum f. sp. lycopersici MN25]	EWZ90664.1	98.63	655	9	0	1	655	655	100	1	655	0	1330
2097	517316948	related to metallo-beta-lactamase family protein [Fusarium fujikuroi IMI 58289]	CCT68190.1	91.8	305	13	1	1	293	293	100	1	305	1e-164	582
2098	517316949	uncharacterized protein FFUJ_06960 [Fusarium fujikuroi IMI 58289]	CCT68191.1	98.53	136	2	0	1	136	136	100	1	136	4e-75	282
2099	342874606	hypothetical protein FOXB_12901 [Fusarium oxysporum Fo5176]	EGU76602.1	90.51	253	21	1	1	250	251	99.6016	1	253	3e-130	468
2102	584131611	hypothetical protein FVEG_03206 [Fusarium verticillioides 7600]	EWG41005.1	94.8	423	22	0	1	423	423	100	1	423	0	846
2103	342874604	hypothetical protein FOXB_12899 [Fusarium oxysporum Fo5176]	EGU76600.1	98.84	86	1	0	1	86	99	86.8687	1	86	2e-43	177
2104	590036852	hypothetical protein FOMG_06256 [Fusarium oxysporum f. sp. melonis 26406]	EXK38710.1	92.77	429	16	2	24	438	438	94.7489	27	454	0	805
2105	342874602	hypothetical protein FOXB_12897 [Fusarium oxysporum Fo5176]	EGU76598.1	90.46	964	85	5	1	959	959	100	1	962	0	1525
2106	477515129	Vegetative incompatibility protein HET-E-1 [Fusarium oxysporum f. sp. cubense race 1]	ENH67485.1	78.23	1093	210	4	238	1304	1305	81.7625	361	1451	0	1740
2107	739107980	unnamed protein product [Fusarium acuminatum CS5907]	CEG03672.1	91.64	347	29	0	1	347	348	99.7126	1	347	0	649
2112	587690085	hypothetical protein FOZG_10660 [Fusarium oxysporum Fo47]	EWZ36690.1	65.34	401	123	5	1	390	391	99.7442	1	396	2e-142	509
2113	517316963	related to quinate transport protein [Fusarium fujikuroi IMI 58289]	CCT68204.1	98.93	559	6	0	1	559	559	100	1	559	0	1133
2114	584131602	hypothetical protein FVEG_03199 [Fusarium verticillioides 7600]	EWG40996.1	97.82	459	10	0	1	459	459	100	1	459	0	936
2115	475665329	hypothetical protein FOC4_g10013329 [Fusarium oxysporum f. sp. cubense race 4]	EMT63121.1	97.49	279	7	0	1	279	279	100	1	279	5e-160	566
2116	587667756	hypothetical protein FOYG_07714 [Fusarium oxysporum FOSC 3-a]	EWY90097.1	91.52	224	7	1	1	212	212	100	1	224	9e-119	429
2117	1028916320	hypothetical protein FVEG_03196 [Fusarium verticillioides]	ANF07021.1	69.33	463	119	4	1	442	442	100	1	461	1e-157	559
2118	1028916319	hypothetical protein FVEG_03195 [Fusarium verticillioides]	ANF07020.1	87.75	1788	123	4	1	1694	1694	100	1	1786	0	3184
2119	584131596	hypothetical protein FVEG_03194 [Fusarium verticillioides 7600]	EWG40990.1	77.75	364	72	5	1	360	360	100	1	359	5e-161	570
2120	587719298	hypothetical protein FOWG_08238 [Fusarium oxysporum f. sp. lycopersici MN25]	EWZ90635.1	96.34	655	24	0	1	655	655	100	1	655	0	1320
2121	829112452	uncharacterized protein LW93_12315 [Fusarium fujikuroi]	KLO88900.1	82.33	498	85	2	1	497	540	92.037	1	496	0	842
2122	475665336	hypothetical protein FOC4_g10013336 [Fusarium oxysporum f. sp. cubense race 4]	EMT63128.1	87.55	273	34	0	1	273	273	100	1	273	1e-140	502
2123	587746569	hypothetical protein FOVG_05757 [Fusarium oxysporum f. sp. pisi HDV247]	EXA44285.1	83.24	525	25	2	1	462	462	100	1	525	0	859
2124	829112454	alfa-L-rhamnosidase [Fusarium fujikuroi]	KLO88902.1	69.37	284	42	1	2	240	288	82.9861	95	378	4e-106	387
2125	587667767	hypothetical protein FOYG_07723 [Fusarium oxysporum FOSC 3-a]	EWY90108.1	89.63	598	62	0	1	598	598	100	1	598	0	1039
2126	517316975	uncharacterized protein FFUJ_06986 [Fusarium fujikuroi IMI 58289]	CCT68215.1	89.44	303	27	1	1	298	305	97.7049	1	303	2e-154	548
2127	584131589	alcohol dehydrogenase [Fusarium verticillioides 7600]	EWG40983.1	98.78	327	4	0	1	327	327	100	1	327	0	672
2128	927752833	alcohol dehydrogenase [Fusarium langsethiae]	KPA36953.1	88.46	52	6	0	1	52	52	100	258	309	5e-22	106
2129	590061263	alcohol dehydrogenase [Fusarium oxysporum f. sp. raphani 54005]	EXK88787.1	68.75	224	16	2	1	170	170	100	84	307	6e-80	299
2130	587746619	hypothetical protein FOVG_05802 [Fusarium oxysporum f. sp. pisi HDV247]	EXA44335.1	83.14	433	42	3	1	404	404	100	1	431	0	679
2131	829112496	putative homoserine O-acetyltransferase [Fusarium fujikuroi]	KLO88944.1	92.2	410	32	0	1	410	410	100	1	410	0	800
2132	829112497	Uncharacterized protein LW93_12361 [Fusarium fujikuroi]	KLO88945.1	88.05	820	42	3	1	764	764	100	492	1311	0	1455
2134	475665367	Putative cytochrome c1 heme lyase [Fusarium oxysporum f. sp. cubense race 4]	EMT63159.1	98.11	264	5	0	1	264	264	100	1	264	3e-152	540
2135	587746605	hypothetical protein FOVG_05793 [Fusarium oxysporum f. sp. pisi HDV247]	EXA44321.1	96.88	448	14	0	1	448	448	100	1	448	0	909
2136	342881519	hypothetical protein FOXB_07091 [Fusarium oxysporum Fo5176]	EGU82409.1	98.98	391	4	0	1	391	391	100	1	391	0	793
2137	1028916292	hypothetical protein FVEG_03164 [Fusarium verticillioides]	ANF06993.1	96.23	477	17	1	1	477	477	100	1	476	0	953
2138	829112480	aerobactin siderophore biosynthesis protein iucB [Fusarium fujikuroi]	KLO88928.1	98.68	531	7	0	1	531	531	100	1	531	0	1077
2139	477515170	hypothetical protein FOC1_g10010808 [Fusarium oxysporum f. sp. cubense race 1]	ENH67526.1	87.04	162	19	1	1	160	161	99.3789	1	162	1e-79	298
2140	587746600	hypothetical protein FOVG_05788 [Fusarium oxysporum f. sp. pisi HDV247]	EXA44316.1	87.12	466	49	1	1	455	455	100	1	466	0	843
2141	517317001	related to hydrolases or acyltransferases (alpha/beta hydrolase superfamily) [Fusarium fujikuroi IMI 58289]	CCT68241.1	92.79	319	23	0	1	319	319	100	1	319	1e-175	619
2142	475665358	hypothetical protein FOC4_h10017574, partial [Fusarium oxysporum f. sp. cubense race 4]	EMT63150.1	97.1	69	2	0	1	69	70	98.5714	1	69	7e-31	135
2143	591487441	hypothetical protein FOTG_14571 [Fusarium oxysporum f. sp. vasinfectum 25433]	EXM17212.1	97.39	460	12	0	1	460	460	100	1	460	0	909
2144	584131566	hypothetical protein FVEG_03168 [Fusarium verticillioides 7600]	EWG40960.1	95.32	299	14	0	1	299	299	100	1	299	2e-163	578
2146	829118397	glutathione S-transferase GST-6.0 [Fusarium fujikuroi]	KLO94637.1	87.78	221	27	0	1	221	221	100	37	257	3e-112	407
2147	587746593	hypothetical protein FOVG_05781 [Fusarium oxysporum f. sp. pisi HDV247]	EXA44309.1	97.5	200	5	0	1	200	200	100	1572	1771	3e-114	413
2148	590061283	hypothetical protein FOQG_08097 [Fusarium oxysporum f. sp. raphani 54005]	EXK88807.1	72.55	419	82	5	1	386	386	100	1	419	9e-102	374
2149	584131569	hypothetical protein FVEG_03171 [Fusarium verticillioides 7600]	EWG40963.1	96.16	1119	24	1	1	1100	1102	99.8185	1	1119	0	2168
2150	590061279	hypothetical protein FOQG_08093 [Fusarium oxysporum f. sp. raphani 54005]	EXK88803.1	83.1	1018	153	2	1	999	999	100	1	1018	0	1757
2151	584131571	hypothetical protein FVEG_03173 [Fusarium verticillioides 7600]	EWG40965.1	86.31	738	57	3	2	695	720	96.3889	177	914	0	1280
2152	1028916302	hypothetical protein FVEG_03174 [Fusarium verticillioides]	ANF07003.1	84.52	620	66	1	1	590	590	100	1	620	0	1072
2153	584131573	hypothetical protein FVEG_03175 [Fusarium verticillioides 7600]	EWG40967.1	94.96	496	22	1	1	496	496	100	4	496	0	970
2154	584131575	hypothetical protein FVEG_15200 [Fusarium verticillioides 7600]	EWG40969.1	78.07	269	59	0	22	290	290	92.7586	20	288	2e-123	445
2155	751352284	hypothetical protein FAVG1_06744 [Fusarium avenaceum]	KIL90006.1	77.03	1180	199	8	1	1110	1122	98.9305	1	1178	0	1806
2157	584131579	carbonic anhydrase [Fusarium verticillioides 7600]	EWG40973.1	98.97	194	2	0	1	194	194	100	1	194	1e-108	395
2158	590061273	hypothetical protein FOQG_08087 [Fusarium oxysporum f. sp. raphani 54005]	EXK88797.1	84.5	1039	147	2	1	1026	1026	100	9	1046	0	1748
2159	587746583	hypothetical protein FOVG_05771 [Fusarium oxysporum f. sp. pisi HDV247]	EXA44299.1	89.26	242	26	0	1	242	248	97.5806	1	242	3e-124	447
2160	591440830	hypothetical protein FOPG_11169 [Fusarium oxysporum f. sp. conglutinans race 2 54008]	EXL73487.1	73.59	231	39	1	1	209	222	94.1441	268	498	7e-94	346
2161	590061271	hypothetical protein FOQG_08085 [Fusarium oxysporum f. sp. raphani 54005]	EXK88795.1	95.45	88	4	0	1	88	88	100	1	88	6e-42	172
2162	590061270	hypothetical protein FOQG_08084 [Fusarium oxysporum f. sp. raphani 54005]	EXK88794.1	90.85	142	13	0	1	142	155	91.6129	1	142	6e-65	248
2163	342874581	hypothetical protein FOXB_12876 [Fusarium oxysporum Fo5176]	EGU76577.1	62.72	397	83	4	27	358	360	92.2222	1	397	3e-135	484
2164	1028916331	hypothetical protein FVEG_15205 [Fusarium verticillioides]	ANF07032.1	99.43	174	1	0	1	174	174	100	1	174	4e-97	356
2165	1028916309	hypothetical protein FVEG_03183 [Fusarium verticillioides]	ANF07010.1	98.44	513	8	0	1	513	513	100	1	513	0	1049
2167	475665342	NADH oxidase [Fusarium oxysporum f. sp. cubense race 4]	EMT63134.1	95.11	409	10	1	1	399	399	100	1	409	0	780
2168	829112494	uncharacterized protein LW93_12358 [Fusarium fujikuroi]	KLO88942.1	86.16	318	24	1	1	298	298	100	1	318	2e-158	561
2169	517317016	probable O-acetylhomoserine (thiol)-lyase [Fusarium fujikuroi IMI 58289]	CCT68256.1	96.84	474	15	0	1	474	474	100	1	474	0	966
2170	584131539	hypothetical protein FVEG_03154 [Fusarium verticillioides 7600]	EWG40933.1	92.01	676	54	0	1	676	676	100	1	676	0	1290
2171	584131540	hypothetical protein FVEG_03155 [Fusarium verticillioides 7600]	EWG40934.1	81.79	379	21	1	1	331	331	100	1	379	4e-173	610
2172	829112490	uncharacterized protein LW93_12354 [Fusarium fujikuroi]	KLO88938.1	79.26	270	11	3	1	227	227	100	1	268	9e-87	322
2173	584131553	hypothetical protein FVEG_03157 [Fusarium verticillioides 7600]	EWG40947.1	92.41	395	30	0	4	398	398	99.2462	12	406	0	756
2174	517317011	probable O-acetylhomoserine (thiol)-lyase [Fusarium fujikuroi IMI 58289]	CCT68251.1	92.92	438	11	1	59	476	497	84.1046	1	438	0	820
2175	584131555	hypothetical protein FVEG_03159 [Fusarium verticillioides 7600]	EWG40949.1	87	200	25	1	17	216	216	92.5926	266	464	1e-99	365
2176	584131556	hypothetical protein FVEG_03160 [Fusarium verticillioides 7600]	EWG40950.1	91.33	173	15	0	1	173	173	100	157	329	6e-92	338
2177	590036931	hypothetical protein FOMG_06325 [Fusarium oxysporum f. sp. melonis 26406]	EXK38789.1	97.85	186	4	0	1	186	186	100	48	233	2e-101	370
2178	587690150	protein BTN1 [Fusarium oxysporum Fo47]	EWZ36755.1	94.3	456	12	1	1	442	442	100	1	456	0	866
2179	517317023	uncharacterized protein FFUJ_07034 [Fusarium fujikuroi IMI 58289]	CCT68262.1	95.78	403	0	1	1	386	386	100	1	403	0	796
2180	587690152	hypothetical protein FOZG_10721 [Fusarium oxysporum Fo47]	EWZ36757.1	97.17	495	14	0	1	495	495	100	1	495	0	934
2181	517317025	probable IPP1-inorganic pyrophosphatase, cytoplasmic [Fusarium fujikuroi IMI 58289]	CCT68264.1	92.75	345	10	1	1	345	345	100	1	330	0	655
2182	591467168	hypothetical protein FOIG_09315 [Fusarium oxysporum f. sp. cubense tropical race 4 54006]	EXL98550.1	79.29	140	29	0	1	140	140	100	1	140	7e-60	232
2183	829112504	uncharacterized protein LW93_12369 [Fusarium fujikuroi]	KLO88952.1	78.99	138	12	1	1	138	138	100	1	121	2e-50	200
2184	517317028	uncharacterized protein FFUJ_07039 [Fusarium fujikuroi IMI 58289]	CCT68267.1	61.33	181	67	2	4	184	215	84.186	4	181	4e-55	217
2185	587667823	endo-1,4-beta-xylanase [Fusarium oxysporum FOSC 3-a]	EWY90164.1	92.35	549	20	2	1	527	527	100	1	549	0	1014
2186	517317030	uncharacterized protein FFUJ_07041 [Fusarium fujikuroi IMI 58289]	CCT68269.1	88.24	459	39	2	1	444	444	100	56	514	0	805
2200	584131511	hypothetical protein FVEG_03135 [Fusarium verticillioides 7600]	EWG40905.1	78.76	193	10	1	1	162	162	100	1	193	2e-81	303
2201	829156091	uncharacterized protein LW94_7926 [Fusarium fujikuroi]	KLP22356.1	90.52	422	40	0	1	422	423	99.7636	1	422	0	801
2202	587746647	PiT family inorganic phosphate transporter [Fusarium oxysporum f. sp. pisi HDV247]	EXA44363.1	87.82	435	5	1	1	387	454	85.2423	1	435	0	763
2203	587690170	hypothetical protein FOZG_10737 [Fusarium oxysporum Fo47]	EWZ36775.1	94.62	130	7	0	1	130	130	100	1	130	3e-61	236
2204	584131506	hypothetical protein FVEG_15193 [Fusarium verticillioides 7600]	EWG40900.1	95.2	1146	44	6	1	1142	1142	100	1	1139	0	1831
2205	342878654	hypothetical protein FOXB_09492 [Fusarium oxysporum Fo5176]	EGU79962.1	90.97	310	28	0	15	324	324	95.679	15	324	2e-161	572
2206	829112515	uncharacterized protein LW93_12380 [Fusarium fujikuroi]	KLO88963.1	67.58	182	20	2	1	143	144	99.3056	1	182	4e-63	243
2208	587667842	hypothetical protein FOYG_07788 [Fusarium oxysporum FOSC 3-a]	EWY90183.1	91.97	386	15	2	1	370	370	100	1	386	0	722
2209	584131502	hypothetical protein FVEG_03126 [Fusarium verticillioides 7600]	EWG40896.1	97.01	301	9	0	1	301	301	100	1	301	1e-172	608
2210	342878658	hypothetical protein FOXB_09496 [Fusarium oxysporum Fo5176]	EGU79966.1	95.62	137	6	0	1	137	137	100	1	137	2e-71	270
2211	829118352	laccase precursor [Fusarium fujikuroi]	KLO94592.1	96.21	607	18	1	1	602	602	100	1	607	0	1212
2212	587667847	AAT family amino acid transporter [Fusarium oxysporum FOSC 3-a]	EWY90188.1	98.3	528	9	0	1	528	528	100	40	567	0	1051
2213	475665400	hypothetical protein FOC4_g10013411 [Fusarium oxysporum f. sp. cubense race 4]	EMT63192.1	97.32	298	8	0	1	298	298	100	1	298	2e-171	604
2214	584131497	hypothetical protein FVEG_03122 [Fusarium verticillioides 7600]	EWG40891.1	95.02	823	21	1	1	803	803	100	1	823	0	1576
2215	475665403	DnaJ-related protein SCJ1 [Fusarium oxysporum f. sp. cubense race 4]	EMT63195.1	99.28	414	3	0	1	414	414	100	1	414	0	860
2216	342878664	hypothetical protein FOXB_09502 [Fusarium oxysporum Fo5176]	EGU79972.1	60.94	64	7	1	12	57	57	80.7018	13	76	1e-11	72
2217	591486523	hypothetical protein FOTG_15351 [Fusarium oxysporum f. sp. vasinfectum 25433]	EXM16346.1	95.74	1080	30	2	1	1064	1074	99.0689	1	1080	0	1390
2219	584131483	hypothetical protein FVEG_03119 [Fusarium verticillioides 7600]	EWG40877.1	94.41	376	4	1	1	359	359	100	1	376	0	723
2220	475665406	Mannan endo-1,6-alpha-mannosidase DCW1 [Fusarium oxysporum f. sp. cubense race 4]	EMT63198.1	98.04	460	9	0	1	460	460	100	1	460	0	941
2221	584131480	hypothetical protein FVEG_03117 [Fusarium verticillioides 7600]	EWG40874.1	97.12	104	2	1	1	104	119	87.395	1	103	2e-42	174
2222	342878669	hypothetical protein FOXB_09507 [Fusarium oxysporum Fo5176]	EGU79977.1	100	380	0	0	1	380	427	88.993	1	380	0	778
2223	477515217	Cell division cycle-related protein res2/pct1 [Fusarium oxysporum f. sp. cubense race 1]	ENH67573.1	90.83	676	27	3	1	641	641	100	1	676	0	1208
2224	590036991	hypothetical protein FOMG_06365 [Fusarium oxysporum f. sp. melonis 26406]	EXK38849.1	97.7	304	7	0	1	304	304	100	1	304	1e-142	509
2226	517317055	uncharacterized protein FFUJ_07066 [Fusarium fujikuroi IMI 58289]	CCT68292.1	84.68	555	35	5	1	508	508	100	1	552	0	764
2227	517317056	related to septation (sepH) gene [Fusarium fujikuroi IMI 58289]	CCT68293.1	99.22	1407	11	0	1	1407	1408	99.929	1	1407	0	2870
2228	590037002	hypothetical protein FOMG_06372 [Fusarium oxysporum f. sp. melonis 26406]	EXK38860.1	85.87	92	13	0	1	92	93	98.9247	2	93	3e-37	156
2229	829112533	uncharacterized protein LW93_12400 [Fusarium fujikuroi]	KLO88981.1	96.13	465	18	0	1	465	465	100	1	465	0	825
2230	591439858	hypothetical protein FOPG_11912 [Fusarium oxysporum f. sp. conglutinans race 2 54008]	EXL72542.1	92.48	678	49	1	1	676	676	100	1	678	0	1302
2231	342878675	hypothetical protein FOXB_09513 [Fusarium oxysporum Fo5176]	EGU79983.1	86	250	16	1	1	231	231	100	685	934	2e-124	447
2232	517317060	uncharacterized protein FFUJ_07071 [Fusarium fujikuroi IMI 58289]	CCT68296.1	94.25	313	16	1	1	311	311	100	1	313	1e-171	605
2233	342878677	hypothetical protein FOXB_09515 [Fusarium oxysporum Fo5176]	EGU79985.1	96.76	432	4	1	1	422	422	100	1	432	0	835
2234	829112538	neutral amino acid permease [Fusarium fujikuroi]	KLO88986.1	99.81	515	1	0	1	515	515	100	1	515	0	1049
2235	342878679	hypothetical protein FOXB_09517 [Fusarium oxysporum Fo5176]	EGU79987.1	93.05	374	3	1	1	351	351	100	1	374	0	681
2236	584131453	hypothetical protein FVEG_03104 [Fusarium verticillioides 7600]	EWG40847.1	97.59	290	3	1	1	286	286	100	1	290	1e-154	548
2237	475665421	hypothetical protein FOC4_g10013432 [Fusarium oxysporum f. sp. cubense race 4]	EMT63213.1	97.59	249	6	0	1	249	249	100	1	249	8e-146	519
2238	587667896	hypothetical protein FOYG_07822 [Fusarium oxysporum FOSC 3-a]	EWY90237.1	96.53	317	11	0	1	317	317	100	1	317	3e-167	591
2239	517317067	probable RPP1A-60S large subunit acidic ribosomal protein a1 [Fusarium fujikuroi IMI 58289]	CCT68303.1	100	109	0	0	1	109	109	100	1	109	3e-52	206
2240	517317068	related to UPF0662 protein C30C2.08 [Fusarium fujikuroi IMI 58289]	CCT68304.1	98.9	453	5	0	1	453	453	100	1	453	0	920
2241	587667899	hypothetical protein FOYG_07825 [Fusarium oxysporum FOSC 3-a]	EWY90240.1	99.15	117	1	0	1	117	117	100	24	140	6e-63	242
2242	829118326	uncharacterized protein Y057_8700 [Fusarium fujikuroi]	KLO94566.1	95.83	264	11	0	1	264	264	100	1	264	4e-143	510
2243	342878687	hypothetical protein FOXB_09525 [Fusarium oxysporum Fo5176]	EGU79995.1	97.52	121	3	0	1	121	121	100	1	121	2e-62	240
2244	584131445	hypothetical protein FVEG_03096 [Fusarium verticillioides 7600]	EWG40839.1	95.15	515	9	1	1	499	499	100	1	515	0	979
2245	584131443	hypothetical protein FVEG_03095 [Fusarium verticillioides 7600]	EWG40837.1	97.96	734	5	2	1	724	724	100	1	734	0	1390
2246	517317074	uncharacterized protein FFUJ_07085 [Fusarium fujikuroi IMI 58289]	CCT68310.1	94.88	332	3	1	1	318	318	100	1	332	2e-176	622
2247	584131440	methyltransferase [Fusarium verticillioides 7600]	EWG40834.1	98.8	166	2	0	1	166	166	100	1	166	1e-93	344
2248	584131439	hypothetical protein FVEG_03091 [Fusarium verticillioides 7600]	EWG40833.1	94.64	541	8	1	1	520	521	99.8081	1	541	0	1038
2249	517317077	uncharacterized protein FFUJ_07088 [Fusarium fujikuroi IMI 58289]	CCT68313.1	93.08	853	19	5	1	818	818	100	1	848	0	1436
2251	591467087	hypothetical protein FOIG_09253 [Fusarium oxysporum f. sp. cubense tropical race 4 54006]	EXL98469.1	98.3	471	8	0	1	471	471	100	1	471	0	953
2252	517317079	related to ribosomal protein YmL20 precursor, mitochondrial [Fusarium fujikuroi IMI 58289]	CCT68315.1	97.09	206	6	0	1	206	206	100	1	206	2e-112	407
2253	477515247	hypothetical protein FOC1_g10010886 [Fusarium oxysporum f. sp. cubense race 1]	ENH67603.1	98.23	396	7	0	1	396	396	100	1	396	0	770
2255	517317081	related to BUD2-GTPase-activating protein for Bud1p/Rsr1p [Fusarium fujikuroi IMI 58289]	CCT68317.1	99.08	870	8	0	1	870	870	100	368	1237	0	1779
2256	829112558	putative CPR6-member of the cyclophilin family [Fusarium fujikuroi]	KLO89006.1	99.46	372	2	0	1	372	372	100	1	372	0	758
2257	587690257	D-tyrosyl-tRNA(Tyr) deacylase [Fusarium oxysporum Fo47]	EWZ36862.1	100	153	0	0	1	153	153	100	1	153	3e-84	313
2258	587690258	hypothetical protein FOZG_10797 [Fusarium oxysporum Fo47]	EWZ36863.1	94.08	625	5	1	1	593	593	100	1	625	0	1182
2259	584131424	hypothetical protein FVEG_03081 [Fusarium verticillioides 7600]	EWG40818.1	99.15	234	1	1	1	234	234	100	1	233	2e-133	478
2260	517317086	uncharacterized protein FFUJ_07097 [Fusarium fujikuroi IMI 58289]	CCT68320.1	87.12	233	14	2	1	218	218	100	496	727	3e-103	377
2261	591503863	hypothetical protein FOTG_03279 [Fusarium oxysporum f. sp. vasinfectum 25433]	EXM33208.1	88.25	434	51	0	1	434	446	97.3094	1	434	0	773
2262	475665450	hypothetical protein FOC4_g10013460 [Fusarium oxysporum f. sp. cubense race 4]	EMT63242.1	94.65	579	10	3	1	560	602	93.0233	1	577	0	926
2263	517317088	probable IDP1-isocitrate dehydrogenase (NADP+), mitochondrial [Fusarium fujikuroi IMI 58289]	CCT68322.1	95.02	462	2	1	1	441	441	100	1	462	0	865
2264	587690266	hypothetical protein FOZG_10801 [Fusarium oxysporum Fo47]	EWZ36871.1	98.22	338	5	1	1	338	338	100	1	337	4e-178	627
2265	584131417	hypothetical protein FVEG_03076 [Fusarium verticillioides 7600]	EWG40811.1	98.01	703	14	0	1	703	704	99.858	1	703	0	1425
2266	591503847	hypothetical protein FOTG_03274 [Fusarium oxysporum f. sp. vasinfectum 25433]	EXM33192.1	92.27	1462	61	3	1	1412	1412	100	1	1460	0	2461
2267	342876202	hypothetical protein FOXB_11622 [Fusarium oxysporum Fo5176]	EGU77858.1	88.35	249	16	1	1	236	237	99.5781	1	249	2e-120	434
2268	584131407	hypothetical protein FVEG_03072 [Fusarium verticillioides 7600]	EWG40801.1	89.81	618	24	2	1	579	579	100	1	618	0	1134
2269	590037072	hypothetical protein FOMG_06416 [Fusarium oxysporum f. sp. melonis 26406]	EXK38930.1	94.86	331	12	1	1	326	326	100	1	331	0	642
2270	584131405	hypothetical protein FVEG_15177 [Fusarium verticillioides 7600]	EWG40799.1	91.76	85	7	0	22	106	106	80.1887	27	111	4e-38	159
2271	587719110	hypothetical protein FOWG_08099 [Fusarium oxysporum f. sp. lycopersici MN25]	EWZ90447.1	90.14	71	7	0	1	71	71	100	1	71	9e-32	138
2272	477515264	hypothetical protein FOC1_g10010903 [Fusarium oxysporum f. sp. cubense race 1]	ENH67620.1	92.26	478	11	1	65	516	516	87.5969	40	517	0	920
2273	342876207	hypothetical protein FOXB_11627 [Fusarium oxysporum Fo5176]	EGU77863.1	91.33	623	51	1	1	623	623	100	1	620	0	1169
2274	584131400	hypothetical protein FVEG_03068 [Fusarium verticillioides 7600]	EWG40794.1	89.5	543	34	1	1	520	520	100	1	543	0	1005
2275	342876210	hypothetical protein FOXB_11630 [Fusarium oxysporum Fo5176]	EGU77866.1	92.81	278	20	0	1	278	278	100	1	278	3e-149	530
2276	517317100	related to 3-oxoacyl-[acyl-carrier-protein] reductase [Fusarium fujikuroi IMI 58289]	CCT68334.1	95.22	711	18	2	23	719	719	96.9402	15	723	0	1388
2277	590061456	hypothetical protein FOQG_08216 [Fusarium oxysporum f. sp. raphani 54005]	EXK88980.1	98.96	96	1	0	1	96	96	100	183	278	2e-49	197
2278	475665468	Nodulation protein G [Fusarium oxysporum f. sp. cubense race 4]	EMT63260.1	99.45	181	1	0	1	181	181	100	1	181	1e-100	368
2279	584131396	hypothetical protein FVEG_03064 [Fusarium verticillioides 7600]	EWG40790.1	93.09	492	12	1	1	470	470	100	1	492	0	902
2280	587690295	gluconolactonase [Fusarium oxysporum Fo47]	EWZ36900.1	97.26	328	9	0	1	328	328	100	1	328	0	662
2281	584131394	hypothetical protein FVEG_03062 [Fusarium verticillioides 7600]	EWG40788.1	74.85	676	127	5	72	714	718	89.5543	5	670	0	907
2282	587667965	hypothetical protein FOYG_07867 [Fusarium oxysporum FOSC 3-a]	EWY90306.1	93.15	219	12	2	1	218	218	100	1	217	1e-93	345
2283	829127391	uncharacterized protein LW94_9063 [Fusarium fujikuroi]	KLP02375.1	64.23	562	179	4	1	542	542	100	20	579	0	716
2285	517317109	chitin synthase class I [Fusarium fujikuroi IMI 58289]	CCT68343.1	93.8	903	7	2	1	854	854	100	1	903	0	1747
2286	342876222	hypothetical protein FOXB_11642 [Fusarium oxysporum Fo5176]	EGU77878.1	89.24	251	26	1	15	264	264	94.697	25	275	4e-130	467
2287	591503820	hypothetical protein FOTG_03251 [Fusarium oxysporum f. sp. vasinfectum 25433]	EXM33165.1	94.55	385	21	0	1	385	385	100	1	385	0	701
2288	584131385	hypothetical protein FVEG_03055 [Fusarium verticillioides 7600]	EWG40779.1	95.27	317	15	0	1	317	317	100	1	317	1e-175	619
2289	584131384	hypothetical protein FVEG_03054 [Fusarium verticillioides 7600]	EWG40778.1	77.33	516	95	2	1	516	516	100	1	494	0	806
2290	517317114	uncharacterized protein FFUJ_07125 [Fusarium fujikuroi IMI 58289]	CCT68348.1	94.44	126	7	0	1	126	126	100	1	126	4e-65	249
2291	408387724	hypothetical protein FPSE_12353 [Fusarium pseudograminearum CS3096]	EKJ67434.1	92.8	236	17	0	1	236	236	100	1	236	2e-124	447
2292	829153261	uncharacterized protein LW94_7223 [Fusarium fujikuroi]	KLP20684.1	95.97	372	7	1	1	364	364	100	1	372	0	732
2293	342882051	hypothetical protein FOXB_06608 [Fusarium oxysporum Fo5176]	EGU82805.1	99.55	441	2	0	1	441	441	100	1	441	0	914
2294	342882052	hypothetical protein FOXB_06609 [Fusarium oxysporum Fo5176]	EGU82806.1	100	184	0	0	1	184	184	100	1	184	1e-105	384
2295	829112594	uncharacterized protein LW93_12463 [Fusarium fujikuroi]	KLO89042.1	91.22	353	28	1	1	353	353	100	1	350	0	653
2296	517317120	probable dynactin Arp1 p25 subunit RO12 [Fusarium fujikuroi IMI 58289]	CCT68354.1	88.78	196	2	1	1	176	176	100	1	196	6e-93	342
2297	829106207	uncharacterized protein Y057_12154 [Fusarium fujikuroi]	KLO82872.1	95.97	248	10	0	1	248	248	100	1	248	6e-126	453
2298	829112597	transmembrane transporter Liz1p [Fusarium fujikuroi]	KLO89045.1	100	476	0	0	1	476	476	100	1	476	0	987
2299	517317123	related to general amidase [Fusarium fujikuroi IMI 58289]	CCT68357.1	95.47	530	8	1	17	530	530	96.9811	17	546	0	1019
2300	517317124	MAP kinase [Fusarium fujikuroi IMI 58289]	CCT68358.1	94.98	418	0	1	1	397	397	100	1	418	0	818
2301	584131369	hypothetical protein FVEG_03042 [Fusarium verticillioides 7600]	EWG40763.1	99.38	162	1	0	1	162	162	100	1	162	3e-92	339
2302	342882060	hypothetical protein FOXB_06617 [Fusarium oxysporum Fo5176]	EGU82814.1	94.74	133	7	0	1	133	133	100	1	133	6e-68	258
2303	517317127	related to UPS1 Mitochondrial intermembrane space protein that regulates alternative processing and sorting of Mgm1p and other proteins [Fusarium fujikuroi IMI 58289]	CCT68360.1	99.57	232	1	0	1	232	232	100	1	232	1e-134	481
2304	584131366	hypothetical protein FVEG_03039 [Fusarium verticillioides 7600]	EWG40760.1	99.1	444	4	0	1	444	444	100	1	444	0	915
[truncated: 11,842 more rows]
