# Supplementary material for: Virulence and pathogenicity determinants in whole genome sequence of Fusarium udum causing wilt of pigeon pea
Source: Front Microbiol. 2023 Feb 17;14:1066096. doi: 10.3389/fmicb.2023.1066096 (PMC9981795; doi:10.3389/fmicb.2023.1066096)
Supplement: Supplementary file 3 [file Table_2.XLSX]

## Sheet: GPI anchor
Protein id	Protein name	omega-site position	Specificity
106	hypothetical protein FOTG_08421 [Fusarium oxysporum f. sp. vasinfectum 25433]	704	1
303	hypothetical protein FVEG_04312 [Fusarium verticillioides 7600]	702	1
707	probable beta (1-3) glucanosyltransferase [Fusarium fujikuroi IMI 58289]	452	1
747	uncharacterized protein FFUJ_13270 [Fusarium fujikuroi IMI 58289]	223	1
884	hypothetical protein FOYG_01456 [Fusarium oxysporum FOSC 3-a]	267	1
1591	uncharacterized protein LW93_6607 [Fusarium fujikuroi]	220	1
1609	hypothetical protein FVEG_07218 [Fusarium verticillioides 7600]	383	1
1907	uncharacterized protein	1241	1
1949	uncharacterized protein FFUJ_06800 [Fusarium fujikuroi IMI 58289]	630	1
1978	phospholipase A2 [Fusarium oxysporum f. sp. melonis 26406]	608	1
2006	uncharacterized protein	203	1
2466	hypothetical protein FOTG_03076 [Fusarium oxysporum f. sp. vasinfectum 25433]	369	1
2564	probable beta(1-3)glucanosyltransferases [Fusarium fujikuroi IMI 58289]	420	1
2698	hypothetical protein FOC4_g10013933 [Fusarium oxysporum f. sp. cubense race 4]	144	1
2917	hypothetical protein FVEG_08950 [Fusarium verticillioides 7600]	178	1
2944	murein transglycosylase [Fusarium verticillioides 7600]	456	1
3385	uncharacterized protein	126	1
3686	hypothetical protein FOZG_12529 [Fusarium oxysporum Fo47]	312	1
3935	related to xyloglucan endo-transglycosylase-like protein [Fusarium fujikuroi IMI 58289]	266	1
4028	probable SED1-abundant cell surface glycoprotein [Fusarium fujikuroi IMI 58289]	173	1
4615	hypothetical protein FOXB_11878 [Fusarium oxysporum Fo5176]	225	1
5674	uncharacterized protein FFUJ_03310 [Fusarium fujikuroi IMI 58289]	453	1
5789	hypothetical protein FOIG_05413 [Fusarium oxysporum f. sp. cubense tropical race 4 54006]	406	1
5821	uncharacterized protein FFUJ_03441 [Fusarium fujikuroi IMI 58289]	207	1
6612	hypothetical protein FVEG_13447 [Fusarium verticillioides 7600]	215	1
6785	hypothetical protein FOMG_13012 [Fusarium oxysporum f. sp. melonis 26406]	768	1
7063	uncharacterized protein FFUJ_00440 [Fusarium fujikuroi IMI 58289]	193	1
7198	uncharacterized protein Y057_6986 [Fusarium fujikuroi]	281	1
7745	hypothetical protein FOPG_11841 [Fusarium oxysporum f. sp. conglutinans race 2 54008]	269	1
7759	hypothetical protein FOVG_11822 [Fusarium oxysporum f. sp. pisi HDV247]	260	1
8083	hypothetical protein FOWG_03461 [Fusarium oxysporum f. sp. lycopersici MN25]	227	1
8146	uncharacterized protein	529	1
8235	hypothetical protein FVEG_09992 [Fusarium verticillioides 7600]	314	1
8594	hypothetical protein FOTG_16341 [Fusarium oxysporum f. sp. vasinfectum 25433]	567	1
8775	hypothetical protein FVEG_01716 [Fusarium verticillioides 7600]	136	1
8804	hypothetical protein FOMG_10978 [Fusarium oxysporum f. sp. melonis 26406]	164	1
9086	hypothetical protein FOWG_09512 [Fusarium oxysporum f. sp. lycopersici MN25]	224	1
9326	hypothetical protein FVEG_02268 [Fusarium verticillioides 7600]	428	1
10285	hypothetical protein FOXB_09761 [Fusarium oxysporum Fo5176]	176	1
10298	hypothetical protein FVEG_10741 [Fusarium verticillioides 7600]	241	1
10529	uncharacterized protein	1057	1
10680	hypothetical protein FOZG_13026 [Fusarium oxysporum Fo47]	256	1
10873	uncharacterized protein LW93_7108 [Fusarium fujikuroi]	373	1
11051	related to proteoglycan [Fusarium fujikuroi IMI 58289]	616	1
11236	hypothetical protein FVEG_03804 [Fusarium verticillioides 7600]	211	1
11247	hypothetical protein FVEG_03815 [Fusarium verticillioides 7600]	321	1
11412	hypothetical protein FOIG_06022 [Fusarium oxysporum f. sp. cubense tropical race 4 54006]	178	1
11448	hypothetical protein FVEG_03995 [Fusarium verticillioides 7600]	105	1
11639	hypothetical protein FOXB_13198 [Fusarium oxysporum Fo5176]	174	1
11664	hypothetical protein FOVG_04614 [Fusarium oxysporum f. sp. pisi HDV247]	445	1
11666	uncharacterized protein FFUJ_04525 [Fusarium fujikuroi IMI 58289]	202	1
12013	hypothetical protein FOMG_12417 [Fusarium oxysporum f. sp. melonis 26406]	1124	1
12301	hypothetical protein FVEG_05953 [Fusarium verticillioides 7600]	175	1
12513	uncharacterized protein LW94_7657 [Fusarium fujikuroi]	801	1
12628	uncharacterized protein FFUJ_04787 [Fusarium fujikuroi IMI 58289]	177	1
12730	uncharacterized protein	214	1
12754	hypothetical protein FOWG_14463 [Fusarium oxysporum f. sp. lycopersici MN25]	142	1
12933	hypothetical protein FOMG_14416 [Fusarium oxysporum f. sp. melonis 26406]	425	1
13010	hypothetical protein FOC4_g10009800 [Fusarium oxysporum f. sp. cubense race 4]	353	1
13032	hypothetical protein FOYG_13402 [Fusarium oxysporum FOSC 3-a]	150	1
13112	hypothetical protein FOXB_05899 [Fusarium oxysporum Fo5176]	163	1
13596	uncharacterized protein LW93_5869 [Fusarium fujikuroi]	274	1
13717	5'-nucleotidase [Fusarium verticillioides 7600]	565	1
13724	hypothetical protein FVEG_07535 [Fusarium verticillioides 7600]	173	1
14202	hypothetical protein FOTG_10098 [Fusarium oxysporum f. sp. vasinfectum 25433]	321	1
14307	acid phosphatase [Fusarium verticillioides 7600]	581	1
14435	lysophospholipase [Fusarium oxysporum f. sp. cubense tropical race 4 54006]	623	1
15024	uncharacterized protein Y057_8878 [Fusarium fujikuroi]	628	1
15471	uncharacterized protein Y057_13379 [Fusarium fujikuroi]	178	1
15618	hypothetical protein FOC4_g10015057 [Fusarium oxysporum f. sp. cubense race 4]	240	1
15793	hypothetical protein FOXB_02150 [Fusarium oxysporum Fo5176]	189	1
15819	uncharacterized protein FFUJ_01011 [Fusarium fujikuroi IMI 58289]	167	1
10	uncharacterized protein	106	0.999
318	L-sorbosone dehydrogenase [Fusarium oxysporum f. sp. cubense race 4]	454	0.999
380	Uncharacterized protein Y057_2617 [Fusarium fujikuroi]	330	0.999
695	uncharacterized protein Y057_591 [Fusarium fujikuroi]	225	0.999
835	related to dihydrodipicolinate synthase [Fusarium fujikuroi IMI 58289]	257	0.999
1273	uncharacterized protein FFUJ_14552 [Fusarium fujikuroi IMI 58289]	202	0.999
1579	uncharacterized protein FFUJ_12385 [Fusarium fujikuroi IMI 58289]	176	0.999
2472	related to BSC1 Transcript encoded by this ORF shows a high level of stop codon bypass [Fusarium fujikuroi IMI 58289]	414	0.999
2517	probable clock-controlled protein 6 (CCG-6) [Fusarium fujikuroi IMI 58289]	131	0.999
2553	hypothetical protein FOMG_06714 [Fusarium oxysporum f. sp. melonis 26406]	373	0.999
3314	hypothetical protein FOCG_07564 [Fusarium oxysporum f. sp. radicis-lycopersici 26381]	92	0.999
3577	hypothetical protein FVEG_06738 [Fusarium verticillioides 7600]	86	0.999
3731	hypothetical protein FVEG_06895 [Fusarium verticillioides 7600]	163	0.999
3855	aspartic proteinase OPSB [Fusarium fujikuroi]	436	0.999
3999	hypothetical protein FOC1_g10009565 [Fusarium oxysporum f. sp. cubense race 1]	552	0.999
4012	uncharacterized protein LW93_13477 [Fusarium fujikuroi]	489	0.999
4614	uncharacterized protein FFUJ_02272 [Fusarium fujikuroi IMI 58289]	212	0.999
5189	hypothetical protein FVEG_08164 [Fusarium verticillioides 7600]	432	0.999
5445	hypothetical protein FVEG_05208 [Fusarium verticillioides 7600]	238	0.999
5477	hypothetical protein FOXB_10414 [Fusarium oxysporum Fo5176]	337	0.999
6053	Uncharacterized protein LW93_9468 [Fusarium fujikuroi]	538	0.999
6474	cell wall glycoprotein [Fusarium fujikuroi]	302	0.999
6621	related to xyloglucan endo-transglycosylase-like protein [Fusarium fujikuroi IMI 58289]	362	0.999
6722	uncharacterized protein FFUJ_12906 [Fusarium fujikuroi IMI 58289]	316	0.999
7187	hypothetical protein FVEG_00261 [Fusarium verticillioides 7600]	168	0.999
7760	hypothetical protein FOXB_01529 [Fusarium oxysporum Fo5176]	259	0.999
7905	PRC1-carboxypeptidase y, serine-type protease [Fusarium fujikuroi]	193	0.999
8366	uncharacterized protein	111	0.999
8758	uncharacterized protein	155	0.999
8928	cornifin B [Fusarium fujikuroi]	417	0.999
9266	Transforming growth factor-beta-induced protein ig-h3 [Fusarium oxysporum f. sp. cubense race 1]	374	0.999
9294	hypothetical protein FVEG_02239 [Fusarium verticillioides 7600]	161	0.999
9503	hypothetical protein FOIG_12080 [Fusarium oxysporum f. sp. cubense tropical race 4 54006]	474	0.999
9782	hypothetical protein FOYG_10358 [Fusarium oxysporum FOSC 3-a]	179	0.999
10674	hypothetical protein FOIG_15726 [Fusarium oxysporum f. sp. cubense tropical race 4 54006]	413	0.999
10760	Uncharacterized protein Y057_1616 [Fusarium fujikuroi]	298	0.999
10769	uncharacterized protein	1564	0.999
10955	hypothetical protein FVEG_03548 [Fusarium verticillioides 7600]	118	0.999
11110	hydrophobin 1 [Fusarium verticillioides]	104	0.999
11665	hypothetical protein FOC1_g10011115 [Fusarium oxysporum f. sp. cubense race 1]	190	0.999
11902	hypothetical protein FOC4_g10011674 [Fusarium oxysporum f. sp. cubense race 4]	187	0.999
12352	uncharacterized protein LW93_9221 [Fusarium fujikuroi]	53	0.999
13721	probable lysophospholipase [Fusarium fujikuroi IMI 58289]	643	0.999
13739	hypothetical protein FVEG_07547 [Fusarium verticillioides 7600]	414	0.999
13764	uncharacterized protein LW93_5716 [Fusarium fujikuroi]	211	0.999
13929	uncharacterized protein FFUJ_13992 [Fusarium fujikuroi IMI 58289]	291	0.999
14441	uncharacterized protein LW93_6855 [Fusarium fujikuroi]	211	0.999
14749	hypothetical protein FVEG_09920 [Fusarium verticillioides 7600]	242	0.999
15178	uncharacterized protein FFUJ_01665 [Fusarium fujikuroi IMI 58289]	125	0.999
15692	hypothetical protein FOC4_g10015139 [Fusarium oxysporum f. sp. cubense race 4]	111	0.999
15824	hypothetical protein FVEG_00945 [Fusarium verticillioides 7600]	223	0.999
15899	hypothetical protein FOXB_01126 [Fusarium oxysporum Fo5176]	240	0.999
