# Supplementary material for: Virulence and pathogenicity determinants in whole genome sequence of Fusarium udum causing wilt of pigeon pea
Source: Front Microbiol. 2023 Feb 17;14:1066096. doi: 10.3389/fmicb.2023.1066096 (PMC9981795; doi:10.3389/fmicb.2023.1066096)
Supplement: Supplementary file 4 [file Table_3.XLSX]

## Sheet: Secretome PHI
479_g	PHI:4980	G5A0G9	XEG1	Phytophthora_sojae	Soybean Stem And Root Rot	effector_(plant_avirulence_determinant)	36.71	207	129	2	45	250	34	239	3e-37	149
2751_g	PHI:3216	G4MVX4	MoCDIP4	Magnaporthe_oryzae	Rice Blast	effector_(plant_avirulence_determinant)	41.67	288	143	10	20	294	19	294	8e-43	168
6481_g	PHI:3216	G4MVX4	MoCDIP4	Magnaporthe_oryzae	Rice Blast	effector_(plant_avirulence_determinant)	38.89	180	99	7	31	206	59	231	5e-27	116
6485_g	PHI:664	Q9SPD4	PaNie	Pythium_aphanidermatum	No Data Found	effector_(plant_avirulence_determinant)	33.54	158	84	6	27	179	39	180	4e-15	76.3
8079_g	PHI:3216	G4MVX4	MoCDIP4	Magnaporthe_oryzae	Rice Blast	effector_(plant_avirulence_determinant)	37.71	236	108	9	21	239	19	232	6e-29	122
8896_g	PHI:5568	Q9C478	AVR-Pita	Magnaporthe_oryzae	Rice Blast	effector_(plant_avirulence_determinant)	30.17	179	114	8	171	343	42	215	8e-12	65.9
9223_g	PHI:3123	H7CE70	CoMC69	Colletotrichum_orbiculare	Anthracnose Of Cucurbits	effector_(plant_avirulence_determinant)	64.44	45	16	0	9	53	8	52	1e-10	58.5
9976_g	PHI:3215	G4MX34	MoCDIP3	Magnaporthe_oryzae	Rice Blast	effector_(plant_avirulence_determinant)	31.65	79	51	3	1	78	1	77	2e-05	41.6
10071_g	PHI:4980	G5A0G9	XEG1	Phytophthora_sojae	Soybean Stem And Root Rot	effector_(plant_avirulence_determinant)	26.01	273	138	14	21	281	18	238	6e-09	57.4
10535_g	PHI:664	Q9SPD4	PaNie	Pythium_aphanidermatum	No Data Found	effector_(plant_avirulence_determinant)	39.2	125	63	5	34	155	47	161	7e-17	82
12502_g	PHI:3213	G4N8Y3	MoCDIP1	Magnaporthe_oryzae	Rice Blast	effector_(plant_avirulence_determinant)	63.48	356	128	2	1	355	1	355	8e-125	441
12810_g	PHI:3216	G4MVX4	MoCDIP4	Magnaporthe_oryzae	Rice Blast	effector_(plant_avirulence_determinant)	39.13	230	121	7	18	244	19	232	2e-36	147
13885_g	PHI:664	Q9SPD4	PaNie	Pythium_aphanidermatum	No Data Found	effector_(plant_avirulence_determinant)	30.77	195	97	11	47	226	45	216	1e-08	55.8
25_g	PHI:3662	Q87ET0	PspB_(not_PD0218)	Xylella_fastidiosa	Pierce Disease Of Grapes And Citrus Variegated Chlorosis (Cvc)	increased_virulence_(hypervirulence)	29.45	146	82	6	96	234	69	200	3e-05	45.4
1555_g	PHI:3127	B2C3H8	MpCP1	Moniliophthora_perniciosa	Witches’ Broom Disease	increased_virulence_(hypervirulence)	37.4	131	73	3	11	134	13	141	1e-16	80.1
2337_g	PHI:5540	G4MKI0	MSP1	Magnaporthe_oryzae	Rice Blast	increased_virulence_(hypervirulence)	54.35	138	37	4	1	113	1	137	4e-31	127
3701_g	PHI:4575	Q5KEF4	NTH2	Cryptococcus_neoformans	Fungal Meningitis	increased_virulence_(hypervirulence)	32.55	679	342	13	36	636	70	710	2e-94	341
5934_g	PHI:5540	G4MKI0	MSP1	Magnaporthe_oryzae	Rice Blast	increased_virulence_(hypervirulence)	34.29	140	86	3	1	137	1	137	1e-15	77
6345_g	PHI:2393	I1R980	Related_to_O-methylsterigmatocystin_oxidoreductase	Fusarium_graminearum	Fusarium Head Blight	increased_virulence_(hypervirulence)	28.21	475	279	11	53	496	9	452	4e-44	173
6544_g	PHI:3662	Q87ET0	PspB_(not_PD0218)	Xylella_fastidiosa	Pierce Disease Of Grapes And Citrus Variegated Chlorosis (Cvc)	increased_virulence_(hypervirulence)	30.72	153	77	5	129	270	66	200	2e-07	51.6
6743_g	PHI:2383	Q2VF46	MfCUT1	Monilinia_fructicola	Brown Rot	increased_virulence_(hypervirulence)	27.27	209	108	10	22	221	27	200	3e-06	46.6
7506_g	PHI:5354	W8TNJ3	ltaS	Staphylococcus_aureus	Skin Infections; Food Poisoning; Respiratory Diseases	increased_virulence_(hypervirulence)	27.1	107	62	4	313	408	442	543	0.0005	40.8
7838_g	PHI:4211	J9VNH2	FRE3	Cryptococcus_neoformans	No Data Found	increased_virulence_(hypervirulence)	22.64	371	203	12	276	638	165	459	1e-13	73.2
8619_g	PHI:4211	J9VNH2	FRE3	Cryptococcus_neoformans	No Data Found	increased_virulence_(hypervirulence)	25.72	521	261	22	277	727	187	651	3e-23	105
9229_g	PHI:2401	G0T3B3	CaRING1	Xanthomonas_campestris	No Data Found	increased_virulence_(hypervirulence)	39.34	61	34	3	602	661	106	164	1e-05	47
12749_g	PHI:672	P0CM56	CAS1	Cryptococcus_neoformans	Cryptococcosis	increased_virulence_(hypervirulence)	30.92	883	463	35	31	837	47	858	5e-81	297
13170_g	PHI:3417	W5ZQ93	Ohmm	Beauveria_bassiana	White Muscardine Disease	increased_virulence_(hypervirulence)	55.94	917	314	11	1	839	101	1005	0	971
13242_g	PHI:4211	J9VNH2	FRE3	Cryptococcus_neoformans	No Data Found	increased_virulence_(hypervirulence)	23.79	412	222	14	196	592	125	459	6e-20	94
13480_g	PHI:2393	I1R980	Related_to_O-methylsterigmatocystin_oxidoreductase	Fusarium_graminearum	Fusarium Head Blight	increased_virulence_(hypervirulence)	29.65	479	265	13	56	519	9	430	6e-48	186
13519_g	PHI:2393	I1R980	Related_to_O-methylsterigmatocystin_oxidoreductase	Fusarium_graminearum	Fusarium Head Blight	increased_virulence_(hypervirulence)	25.11	227	149	6	418	639	215	425	3e-13	71.6
13717_g	PHI:5386	Q9A0A2	S5nA	Lactococcus_lactis	Non Pathogenic	increased_virulence_(hypervirulence)	24.07	457	276	18	117	523	114	549	2e-09	58.5
16010_g	PHI:2401	G0T3B3	CaRING1	Xanthomonas_campestris	No Data Found	increased_virulence_(hypervirulence)	40.91	88	48	3	320	404	107	193	5e-09	57.4
2181_g	PHI:2540	Q4WX65	IPP1	Aspergillus_fumigatus	Invasive Pulmonary Aspergillosis	lethal	41.12	304	154	6	33	333	110	391	4e-56	213
3016_g	PHI:2519	Q4WQ27	LYS9	Aspergillus_fumigatus	Invasive Pulmonary Aspergillosis	lethal	29.9	311	146	6	23	264	107	414	1e-29	124
4685_g	PHI:2846	Q5RZ66	TRR1	Cryptococcus_neoformans	No Data Found	lethal	25.91	247	154	9	25	252	2	238	0.0001	42.4
7737_g	PHI:5271	Q8Y0J2	fabG1	Ralstonia_solanacearum	Bacterial Wilt	lethal	28.57	252	164	7	1	248	5	244	7e-14	72.4
8931_g	PHI:1238	I1S1V3	FGSG_10725	Fusarium_graminearum	Fusarium Ear Blight	lethal	25.79	190	109	5	86	247	271	456	3e-09	57
642_g	PHI:1071	Q705V7	Gas1	Ustilago_maydis	Corn Smut	loss_of_pathogenicity	38.6	860	442	14	12	803	13	854	0	644
2215_g	PHI:5394	J4UPL6	mas5	Beauveria_bassiana	White Muscardine Disease	loss_of_pathogenicity	35.18	361	203	10	23	373	17	356	1e-48	188
3332_g	PHI:352	Q7Z868	GLO1	Ustilago_maydis	Corn Smut	loss_of_pathogenicity	23.32	536	276	23	289	708	102	618	3e-12	68.6
4517_g	PHI:407	Q9Y7G8	PBC1	Pyrenopeziza_brassicae	Light Leaf Spot	loss_of_pathogenicity	34.26	108	60	5	49	147	32	137	2e-05	42.7
5004_g	PHI:4475	G4MUR7	MoTup1	Magnaporthe_oryzae	Rice Blast	loss_of_pathogenicity	26.22	286	170	9	450	730	349	598	2e-14	75.9
7150_g	PHI:352	Q7Z868	GLO1	Ustilago_maydis	Corn Smut	loss_of_pathogenicity	24.67	381	190	16	646	938	97	468	2e-06	49.7
8490_g	PHI:1071	Q705V7	Gas1	Ustilago_maydis	Corn Smut	loss_of_pathogenicity	29.89	368	220	11	602	944	614	968	1e-30	129
13135_g	PHI:352	Q7Z868	GLO1	Ustilago_maydis	Corn Smut	loss_of_pathogenicity	22.06	553	270	23	259	679	95	618	7e-07	50.4
14202_g	PHI:407	Q9Y7G8	PBC1	Pyrenopeziza_brassicae	Light Leaf Spot	loss_of_pathogenicity	27.45	102	53	4	23	111	31	124	1e-05	45.4
15167_g	PHI:3936	A7EB00	Ss-caf1	Sclerotinia_sclerotiorum	White Mould Or Stem Rot	loss_of_pathogenicity	52.26	199	92	2	2	199	7	203	2e-56	212
15618_g	PHI:383	Q5AD07	SOD5	Candida_albicans	Candidiasis	loss_of_pathogenicity	38.46	143	83	2	57	199	41	178	2e-22	100
15820_g	PHI:2114	G4MTZ0	Calnexin	Magnaporthe_oryzae	Rice Blast	loss_of_pathogenicity	69.45	586	164	7	1	581	1	576	0	778
1058_g	PHI:3907	D3W9Z8	ZrfC	Aspergillus_fumigatus	Invasive Pulmonary Aspergillosis	mixed	46.51	516	158	12	47	515	78	522	6e-110	392
2027_g	PHI:4194	V5XZS6	AKT7	Alternaria_alternata	Citrus Black Rot	mixed	23.11	238	165	7	261	491	267	493	4e-11	64.3
3318_g	PHI:4879	A0A0C4DHY2	pg1	Fusarium_oxysporum	Fusarium Wilt	mixed	93.52	355	23	0	20	374	17	371	0	664
3556_g	PHI:24	Q00903	Avenacinase_gene	Gaeumannomyces_graminis	Take-All	mixed	54.62	780	310	13	62	809	26	793	0	817
4694_g	PHI:4880	A0A0C4DHY4	pgx6	Fusarium_oxysporum	Fusarium Wilt	mixed	98.48	460	7	0	1	460	1	460	0	968
5908_g	PHI:4620	A0A0D3LXG7	PcPL20	Phytophthora_capsici	Vine Blight	mixed	41.67	216	100	6	24	216	26	238	4e-39	155
5922_g	PHI:2388	Q4U4T0	Chi2	Metarhizium_anisopliae	No Data Found	mixed	54.05	37	17	0	421	457	382	418	6e-08	53.5
6041_g	PHI:4880	A0A0C4DHY4	pgx6	Fusarium_oxysporum	Fusarium Wilt	mixed	58.9	455	156	6	4	431	3	453	5e-160	558
6106_g	PHI:2476	G8AA67	CcpelA	Colletotrichum_coccodes	Anthracnose	mixed	54.49	301	107	5	21	293	27	325	2e-80	293
6188_g	PHI:4619	A0A0D3LXF0	PcPL16	Phytophthora_capsici	Vine Blight	mixed	38.37	331	181	9	40	349	43	371	1e-57	219
6195_g	PHI:2227	D4III8	pao	Ustilago_maydis	Corn Smut	mixed	47.92	48	24	1	29	75	19	66	3e-05	44.7
6441_g	PHI:2138	G4NCF7	SGA1	Magnaporthe_oryzae	Rice Blast	mixed	47.83	623	276	10	5	582	30	648	2e-163	570
6531_g	PHI:24	Q00903	Avenacinase_gene	Gaeumannomyces_graminis	Take-All	mixed	40.12	800	386	18	36	775	27	793	1e-148	521
7556_g	PHI:2476	G8AA67	CcpelA	Colletotrichum_coccodes	Anthracnose	mixed	48.25	228	113	4	59	283	56	281	3e-53	203
7760_g	PHI:2403	A9QUB2	CSN1	Fusarium_solani	No Data Found	mixed	72.16	273	70	2	1	267	1	273	7e-108	384
8118_g	PHI:2476	G8AA67	CcpelA	Colletotrichum_coccodes	Anthracnose	mixed	76.39	305	72	0	20	324	21	325	3e-134	472
8829_g	PHI:2403	A9QUB2	CSN1	Fusarium_solani	No Data Found	mixed	35.46	251	89	9	5	184	7	255	9e-23	100
9978_g	PHI:5374	K9FGI7	afpB	Penicillium_digitatum	Green Mould	mixed	39.29	84	44	4	1	82	1	79	1e-09	55.1
10413_g	PHI:4620	A0A0D3LXG7	PcPL20	Phytophthora_capsici	Vine Blight	mixed	38.68	243	121	6	20	234	27	269	5e-39	155
10487_g	PHI:1028	Q9C2Y1	bcpme1	Botrytis_cinerea	Grey Mould	mixed	49.43	261	124	5	13	268	25	282	4e-57	216
10570_g	PHI:2376	D2E9W7	DEP2	Alternaria_brassicicola	Black Spot	mixed	20.89	383	244	13	29	381	7	360	3e-08	54.3
10920_g	PHI:4620	A0A0D3LXG7	PcPL20	Phytophthora_capsici	Vine Blight	mixed	39.73	224	101	6	5	196	7	228	2e-35	143
11053_g	PHI:24	Q00903	Avenacinase_gene	Gaeumannomyces_graminis	Take-All	mixed	28.24	262	161	11	144	393	109	355	2e-11	65.9
11112_g	PHI:2527	Q4X0M4	SEC31	Aspergillus_fumigatus	Invasive Pulmonary Aspergillosis	mixed	23.91	184	126	5	283	461	72	246	4e-08	55.8
12724_g	PHI:24	Q00903	Avenacinase_gene	Gaeumannomyces_graminis	Take-All	mixed	34.24	850	426	24	31	843	32	785	9e-116	412
12932_g	PHI:4620	A0A0D3LXG7	PcPL20	Phytophthora_capsici	Vine Blight	mixed	46.56	189	81	5	50	218	42	230	1e-37	151
13085_g	PHI:1028	Q9C2Y1	bcpme1	Botrytis_cinerea	Grey Mould	mixed	33.53	346	212	9	7	335	1	345	6e-41	162
13769_g	PHI:2907	I6YDU0	Cyp51A	Fusarium_graminearum	Fusarium Head Blight	mixed	19.1	513	351	17	8	484	13	497	4e-07	50.8
15234_g	PHI:2305	Q2LK92	BcFKBP12	Botrytis_cinerea	Grey Mould	mixed	48	100	40	3	39	127	19	117	2e-18	86.7
90_g	PHI:3973	L2G011	ASP	Colletotrichum_gloeosporioides	Anthracnose	reduced_virulence	30.87	392	239	15	146	514	46	428	3e-41	164
106_g	PHI:5186	G4MZ98	MoAPX2	Magnaporthe_oryzae	Rice Blast	reduced_virulence	35.71	70	43	2	346	414	736	804	6e-06	47.8
303_g	PHI:5186	G4MZ98	MoAPX2	Magnaporthe_oryzae	Rice Blast	reduced_virulence	37.68	69	35	4	358	420	735	801	0.0001	43.5
318_g	PHI:4717	Q9I167	PA2414	Pseudomonas_aeruginosa	Nosocomial Infections	reduced_virulence	24.42	430	233	15	34	430	64	434	8e-16	79.7
374_g	PHI:2171	G4NJD1	Peroxisomal_copper_amine_oxidase	Magnaporthe_oryzae	Rice Blast	reduced_virulence	22.66	406	264	12	304	666	266	664	6e-17	84
375_g	PHI:4171	P06618	iaaH-1	Pseudomonas_savastanoi	Olive Knot Disease	reduced_virulence	33.54	161	95	4	193	350	59	210	2e-09	59.3
561_g	PHI:4242	Q6WER3	Fgl1	Fusarium_graminearum	Fusarium Head Blight	reduced_virulence	71.99	332	49	2	13	300	13	344	2e-139	489
597_g	PHI:2570	Q6FM61	CYB2	Candida_glabrata	Candidiasis	reduced_virulence	31.35	370	224	6	43	384	196	563	1e-52	201
653_g	PHI:199	Q9P304	AOX1	Passalora_fulva	Leaf Mould	reduced_virulence	26.73	333	196	17	28	333	8	319	5e-14	73.9
689_g	PHI:2712	G2WWK9	NLP2	Verticillium_dahliae	Vascular Wilt	reduced_virulence	69.91	216	63	1	22	235	24	239	6e-82	297
707_g	PHI:434	P0C954	GEL2	Aspergillus_fumigatus	Aspergillosis	reduced_virulence	48.48	427	195	7	6	416	11	428	3e-119	423
1059_g	PHI:2117	P58371	SPM1	Magnaporthe_oryzae	Rice Blast	reduced_virulence	29.17	216	114	7	200	400	213	404	2e-08	56.2
1135_g	PHI:5236	A0A0D2XVZ5	Dnj1	Fusarium_oxysporum	Fusarium Wilt	reduced_virulence	98.66	522	6	1	1	522	1	521	0	1042
1182_g	PHI:816	G4MRS8	MGG_04582	Magnaporthe_oryzae	Rice Blast	reduced_virulence	32.79	247	151	6	83	318	280	522	6e-33	135
1187_g	PHI:361	Q5AEW4	KRE5	Candida_albicans	Candidiasis	reduced_virulence	30.38	1511	824	48	3	1399	10	1406	7e-163	569
1489_g	PHI:3973	L2G011	ASP	Colletotrichum_gloeosporioides	Anthracnose	reduced_virulence	32.04	387	207	14	27	360	35	418	2e-45	177
1496_g	PHI:3236	J9VHR6	Aph1	Cryptococcus_neoformans	Fungal Meningitis	reduced_virulence	23.15	445	265	16	37	421	100	527	3e-17	84.3
1502_g	PHI:222	O59939	PELB	Colletotrichum_gloeosporioides	Anthracnose	reduced_virulence	38.17	262	140	6	58	316	69	311	6e-41	162
1548_g	PHI:2165	G4N3R9	PTH11	Magnaporthe_oryzae	Rice Blast	reduced_virulence	27.65	293	201	7	40	328	61	346	5e-29	123
1619_g	PHI:2901	N1JK93	BEC1040	Blumeria_graminis	Barley Powdery Mildew	reduced_virulence	27.84	176	90	9	29	189	77	230	3e-06	46.2
1866_g	PHI:2412	B9VSG8	lipA	Xanthomonas_campestris	Bacterial Spot Disease	reduced_virulence	23.44	273	174	8	133	370	108	380	0.0001	42.7
1949_g	PHI:5186	G4MZ98	MoAPX2	Magnaporthe_oryzae	Rice Blast	reduced_virulence	39.13	69	40	2	274	341	737	804	2e-06	49.3
1997_g	PHI:2165	G4N3R9	PTH11	Magnaporthe_oryzae	Rice Blast	reduced_virulence	25.55	317	209	8	22	321	17	323	4e-20	93.2
2024_g	PHI:301	Q8J2N0	foSNF1	Fusarium_oxysporum	Vascular Wilt	reduced_virulence	31.61	155	84	7	138	281	122	265	4e-11	63.5
2034_g	PHI:2165	G4N3R9	PTH11	Magnaporthe_oryzae	Rice Blast	reduced_virulence	25.58	215	152	5	179	391	168	376	7e-14	73.2
2149_g	PHI:5186	G4MZ98	MoAPX2	Magnaporthe_oryzae	Rice Blast	reduced_virulence	34.93	209	121	7	896	1100	587	784	7e-22	101
2211_g	PHI:2700	J7MF98	lac2	Colletotrichum_orbiculare	Anthracnose Of Cucurbits	reduced_virulence	47.57	576	291	3	30	597	21	593	5e-165	575
2553_g	PHI:6079	Q5AGC4	Ecm33	Candida_albicans	Disseminated Candidiasis	reduced_virulence	31.43	350	223	11	6	344	7	350	1e-30	129
2564_g	PHI:434	P0C954	GEL2	Aspergillus_fumigatus	Aspergillosis	reduced_virulence	42.06	359	189	10	33	375	25	380	4e-78	286
2683_g	PHI:4003	Q5ANE3	Nce102	Candida_albicans	Disseminated Candidiasis	reduced_virulence	30.06	173	107	7	7	173	6	170	3e-06	45.8
2762_g	PHI:4197	Q5KAG0	LHC1	Cryptococcus_neoformans	No Data Found	reduced_virulence	61.83	372	142	0	25	396	101	472	7e-138	484
2917_g	PHI:184	Q9HFZ2	RBT4	Candida_albicans	Candidiasis	reduced_virulence	38.46	130	76	3	42	167	211	340	5e-21	95.5
2973_g	PHI:2412	B9VSG8	lipA	Xanthomonas_campestris	Bacterial Spot Disease	reduced_virulence	24.57	175	119	4	92	265	67	229	0.0009	39.7
3000_g	PHI:811	G4MS40	MGG_10510	Magnaporthe_oryzae	Rice Blast	reduced_virulence	26.98	278	146	7	38	260	48	323	2e-23	103
3189_g	PHI:1166	I1RFN8	ATG15	Fusarium_graminearum	Fusarium Ear Blight	reduced_virulence	89.47	627	64	1	1	627	12	636	0	1089
3390_g	PHI:4171	P06618	iaaH-1	Pseudomonas_savastanoi	Olive Knot Disease	reduced_virulence	34.18	158	98	3	177	334	59	210	3e-11	64.7
3690_g	PHI:3208	G2WS91	VdMsb	Verticillium_dahliae	Vascular Wilt	reduced_virulence	47.04	406	181	14	560	952	540	924	2e-85	311
3855_g	PHI:72	P0DJ06	SAP2	Candida_albicans	Candidiasis	reduced_virulence	37.27	373	203	8	46	410	44	393	1e-55	211
3904_g	PHI:438	Q6WP49	BcBOT1_(CND5)	Botrytis_cinerea	Grey Mould	reduced_virulence	26.29	426	251	17	30	425	81	473	5e-19	90.5
3980_g	PHI:144	O59928	CHT42	Trichoderma_virens	Mycopathogen	reduced_virulence	48.06	439	208	4	1	433	1	425	1e-111	398
4089_g	PHI:2058	A7U5U4	LHS1	Magnaporthe_oryzae	Rice Blast	reduced_virulence	55.98	1020	408	16	5	1004	1	999	0	1068
4138_g	PHI:2411	A7F946	Ss-ggt1	Sclerotinia_sclerotiorum	White Mould/Stem Rot	reduced_virulence	43.99	366	195	3	209	565	130	494	4e-84	306
4257_g	PHI:4987	P43077	HEX1	Candida_albicans	Disseminated Candidiasis	reduced_virulence	24.73	182	123	5	44	216	30	206	6e-06	47.4
4258_g	PHI:891	G4MVB6	MGG_01748	Magnaporthe_oryzae	Rice Blast	reduced_virulence	23.37	398	235	11	31	376	37	416	1e-13	72.8
4311_g	PHI:4103	B2RKU3	DPPIV	Porphyromonas_gingivalis	Periodontitis	reduced_virulence	33.68	671	392	22	95	749	90	723	2e-88	321
4380_g	PHI:2171	G4NJD1	Peroxisomal_copper_amine_oxidase	Magnaporthe_oryzae	Rice Blast	reduced_virulence	22.41	299	216	9	319	604	244	539	6e-16	80.5
4389_g	PHI:2412	B9VSG8	lipA	Xanthomonas_campestris	Bacterial Spot Disease	reduced_virulence	27.74	155	90	8	96	238	67	211	1e-05	46.2
4395_g	PHI:199	Q9P304	AOX1	Passalora_fulva	Leaf Mould	reduced_virulence	25.34	363	207	13	27	387	10	310	9e-12	66.6
4478_g	PHI:2412	B9VSG8	lipA	Xanthomonas_campestris	Bacterial Spot Disease	reduced_virulence	28	150	98	5	94	238	67	211	0.0002	42
4590_g	PHI:144	O59928	CHT42	Trichoderma_virens	Mycopathogen	reduced_virulence	24.8	250	139	8	105	313	57	298	6e-15	76.6
4654_g	PHI:144	O59928	CHT42	Trichoderma_virens	Mycopathogen	reduced_virulence	24.91	289	158	9	483	735	34	299	1e-12	69.7
4762_g	PHI:144	O59928	CHT42	Trichoderma_virens	Mycopathogen	reduced_virulence	23.45	371	210	15	38	366	52	390	2e-13	71.2
4828_g	PHI:277	Q6WP53	BCP1	Botrytis_cinerea	Grey Mould	reduced_virulence	65.58	154	50	2	46	196	70	223	7e-53	201
5584_g	PHI:5393	W7N216	GLX	Fusarium_verticillioides	Maize Ear Rot	reduced_virulence	24.15	236	123	5	25	208	27	258	2e-11	65.1
5741_g	PHI:2644	P0AA28	thioredoxin_1	Salmonella_enterica	Food Poisoning	reduced_virulence	40.51	79	45	1	23	101	16	92	9e-16	77
5789_g	PHI:4231	G5EHM3	MoFLP1	Magnaporthe_oryzae	Rice Blast	reduced_virulence	33.33	300	172	10	19	313	20	296	5e-27	116
5938_g	PHI:5188	G4N3U4	MoHPX1	Magnaporthe_oryzae	Rice Blast	reduced_virulence	36.73	196	118	4	19	213	33	223	5e-23	104
5953_g	PHI:5393	W7N216	GLX	Fusarium_verticillioides	Maize Ear Rot	reduced_virulence	98.01	904	16	1	1	904	1	902	0	1818
6005_g	PHI:199	Q9P304	AOX1	Passalora_fulva	Leaf Mould	reduced_virulence	24.62	528	321	13	25	506	8	504	4e-29	124
6097_g	PHI:1046	A0ST43	CTB5	Cercospora_nicotianae	Frog-Eye Leafspot	reduced_virulence	29.07	461	296	10	112	546	1	456	7e-56	213
6104_g	PHI:3018	B7VSJ8	Vsp	Vibrio_splendidus	No Data Found	reduced_virulence	30.77	260	142	13	23	246	44	301	1e-14	74.7
6131_g	PHI:438	Q6WP49	BcBOT1_(CND5)	Botrytis_cinerea	Grey Mould	reduced_virulence	23	474	307	12	5	444	23	472	1e-31	132
6155_g	PHI:199	Q9P304	AOX1	Passalora_fulva	Leaf Mould	reduced_virulence	21.51	688	400	25	65	655	6	650	6e-25	110
6159_g	PHI:5188	G4N3U4	MoHPX1	Magnaporthe_oryzae	Rice Blast	reduced_virulence	28	125	64	6	74	198	25	123	3e-06	47
6184_g	PHI:5188	G4N3U4	MoHPX1	Magnaporthe_oryzae	Rice Blast	reduced_virulence	35.81	215	121	6	457	669	31	230	3e-21	98.6
6210_g	PHI:2700	J7MF98	lac2	Colletotrichum_orbiculare	Anthracnose Of Cucurbits	reduced_virulence	48.8	457	209	7	8	446	7	456	5e-124	439
6235_g	PHI:4230	E9RBG1	abcB	Aspergillus_fumigatus	Invasive Pulmonary Aspergillosis	reduced_virulence	54.42	1402	579	10	549	1896	99	1494	0	1567
6331_g	PHI:2117	P58371	SPM1	Magnaporthe_oryzae	Rice Blast	reduced_virulence	38.52	405	213	10	19	395	32	428	1e-58	221
6595_g	PHI:479	C5P3X6	MEP1	Coccidioides_posadasii	Respiratory Disease	reduced_virulence	50.41	246	105	8	2	239	3	239	2e-58	220
6669_g	PHI:5349	G8BDA6	atc1	Candida_parapsilosis	Mycosis	reduced_virulence	28.79	785	423	28	109	828	244	957	6e-70	260
6711_g	PHI:2165	G4N3R9	PTH11	Magnaporthe_oryzae	Rice Blast	reduced_virulence	27.46	346	226	10	26	356	33	368	2e-30	128
6745_g	PHI:197	O93852	ALO1	Candida_albicans	Candidiasis	reduced_virulence	22.08	231	153	9	37	248	31	253	3e-08	54.3
7243_g	PHI:2117	P58371	SPM1	Magnaporthe_oryzae	Rice Blast	reduced_virulence	68.66	536	157	4	1	528	1	533	0	729
7414_g	PHI:1089	I1RFR2	FGSG_02549	Fusarium_graminearum	Fusarium Ear Blight	reduced_virulence	30.53	285	162	8	35	286	12	293	7e-30	125
7547_g	PHI:5185	G4NC17	MoAPX1	Magnaporthe_oryzae	Rice Blast	reduced_virulence	32.73	498	286	13	16	503	16	474	6e-66	246
7593_g	PHI:73	P0CY28	SAP3	Candida_albicans	Candidiasis	reduced_virulence	31.89	185	100	8	104	272	55	229	2e-10	60.5
7621_g	PHI:3290	Q02N79	pqsH	Pseudomonas_aeruginosa	Urinary Tract Infections	reduced_virulence	25.2	381	229	15	6	369	3	344	3e-09	57.8
7732_g	PHI:785	G4NIS9	MGG_04128	Magnaporthe_oryzae	Rice Blast	reduced_virulence	69.98	533	143	5	23	543	23	550	0	768
8004_g	PHI:2654	Q59VF3	DUR1,2	Candida_albicans	Disseminated Candidiasis	reduced_virulence	38.59	184	92	6	125	301	69	238	2e-18	88.6
8054_g	PHI:1046	A0ST43	CTB5	Cercospora_nicotianae	Frog-Eye Leafspot	reduced_virulence	29.22	486	291	17	63	529	3	454	2e-36	148
8094_g	PHI:2897	A0A059UDR8	BEC1019	Blumeria_graminis	Barley Powdery Mildew	reduced_virulence	38.8	299	129	4	15	262	16	311	8e-58	218
8224_g	PHI:144	O59928	CHT42	Trichoderma_virens	Mycopathogen	reduced_virulence	25.18	409	237	16	151	514	22	406	4e-20	94
8495_g	PHI:199	Q9P304	AOX1	Passalora_fulva	Leaf Mould	reduced_virulence	26.07	326	197	11	43	349	8	308	3e-20	94.7
8547_g	PHI:257	Q9P470	GAS2	Magnaporthe_oryzae	Rice Blast	reduced_virulence	55.87	281	113	4	3	281	5	276	3e-79	289
8558_g	PHI:458	O94196	MHP1	Magnaporthe_oryzae	Rice Blast	reduced_virulence	42.57	101	54	4	1	98	1	100	2e-14	71.6
8560_g	PHI:458	O94196	MHP1	Magnaporthe_oryzae	Rice Blast	reduced_virulence	51.39	72	34	1	361	432	31	101	2e-18	88.2
8724_g	PHI:2920	E3QRA4	FET3-1	Colletotrichum_graminicola	Maize Anthracnose	reduced_virulence	57.89	577	223	3	1	563	6	576	0	710
8762_g	PHI:785	G4NIS9	MGG_04128	Magnaporthe_oryzae	Rice Blast	reduced_virulence	39.74	541	241	8	33	513	35	550	2e-107	384
9146_g	PHI:785	G4NIS9	MGG_04128	Magnaporthe_oryzae	Rice Blast	reduced_virulence	40.73	329	173	6	88	396	217	543	3e-65	243
9266_g	PHI:4231	G5EHM3	MoFLP1	Magnaporthe_oryzae	Rice Blast	reduced_virulence	32.99	288	182	2	30	312	20	301	1e-36	148
9326_g	PHI:17	Q00663	ACP	Candida_tropicalis	Candidiasis	reduced_virulence	28.76	372	199	12	50	403	71	394	3e-28	120
9497_g	PHI:812	G4NIB5	MGG_10702	Magnaporthe_oryzae	Rice Blast	reduced_virulence	46.3	54	29	0	69	122	59	112	1e-07	49.7
9503_g	PHI:68	P0CY26	SAP1	Candida_albicans	Candidiasis	reduced_virulence	32.23	422	217	21	1	387	3	390	3e-38	154
9749_g	PHI:2843	Q9P8P2	CnPlb1	Cryptococcus_neoformans	No Data Found	reduced_virulence	29.86	509	303	16	24	503	40	523	8e-49	189
9753_g	PHI:4231	G5EHM3	MoFLP1	Magnaporthe_oryzae	Rice Blast	reduced_virulence	22.54	244	163	9	100	330	22	252	1e-05	45.8
9827_g	PHI:800	G4MZS7	MGG_13324	Magnaporthe_oryzae	Rice Blast	reduced_virulence	23.68	228	138	11	280	490	336	544	0.0002	42.4
9880_g	PHI:3866	Q4JIM2	IDH	Penicillium_expansum	Blue Mould Rot	reduced_virulence	27.82	133	93	3	28	160	5	134	6e-05	43.1
9923_g	PHI:199	Q9P304	AOX1	Passalora_fulva	Leaf Mould	reduced_virulence	25.83	333	205	16	31	339	8	322	7e-14	73.6
9926_g	PHI:4904	C4YR40	Glr1	Candida_albicans	Disseminated Candidiasis	reduced_virulence	24.87	193	114	7	105	282	190	366	2e-05	45.8
9946_g	PHI:3226	T2C7K6	pnl1	Penicillium_digitatum	Green Mould Rot	reduced_virulence	55.05	218	95	2	1	216	1	217	8e-60	224
9947_g	PHI:17	Q00663	ACP	Candida_tropicalis	Candidiasis	reduced_virulence	27.01	348	190	15	69	384	66	381	1e-18	88.6
10080_g	PHI:199	Q9P304	AOX1	Passalora_fulva	Leaf Mould	reduced_virulence	23.4	376	213	14	38	409	6	310	2e-09	59.3
10081_g	PHI:2165	G4N3R9	PTH11	Magnaporthe_oryzae	Rice Blast	reduced_virulence	27.79	331	228	5	28	351	36	362	1e-34	141
10082_g	PHI:5188	G4N3U4	MoHPX1	Magnaporthe_oryzae	Rice Blast	reduced_virulence	28.17	142	74	7	58	199	25	138	1e-06	48.9
10150_g	PHI:199	Q9P304	AOX1	Passalora_fulva	Leaf Mould	reduced_virulence	28.31	325	199	6	22	315	8	329	3e-27	117
10195_g	PHI:1026	P78585	bcplc1	Botrytis_cinerea	Grey Mould	reduced_virulence	32.74	559	252	15	597	1032	394	951	2e-71	265
10449_g	PHI:184	Q9HFZ2	RBT4	Candida_albicans	Candidiasis	reduced_virulence	35	140	76	6	127	263	213	340	1e-10	61.2
10521_g	PHI:3236	J9VHR6	Aph1	Cryptococcus_neoformans	Fungal Meningitis	reduced_virulence	30.34	267	157	11	50	298	126	381	1e-20	95.5
10530_g	PHI:811	G4MS40	MGG_10510	Magnaporthe_oryzae	Rice Blast	reduced_virulence	35.98	264	121	7	37	252	39	302	2e-39	157
10558_g	PHI:438	Q6WP49	BcBOT1_(CND5)	Botrytis_cinerea	Grey Mould	reduced_virulence	28.76	459	300	12	706	1154	38	479	7e-45	177
10560_g	PHI:3236	J9VHR6	Aph1	Cryptococcus_neoformans	Fungal Meningitis	reduced_virulence	25.83	422	272	14	36	429	95	503	2e-26	115
10697_g	PHI:4509	A7EZM9	Ss-odc2	Sclerotinia_sclerotiorum	White Mould	reduced_virulence	39.84	384	219	6	33	409	105	483	5e-77	282
10759_g	PHI:527	Q59L12	ALS3	Candida_albicans	Candidiasis	reduced_virulence	35.36	444	235	19	747	1178	438	841	7e-16	82
10794_g	PHI:5393	W7N216	GLX	Fusarium_verticillioides	Maize Ear Rot	reduced_virulence	31.58	342	192	10	478	785	40	373	1e-35	146
10873_g	PHI:4231	G5EHM3	MoFLP1	Magnaporthe_oryzae	Rice Blast	reduced_virulence	28.27	336	205	8	25	359	18	318	3e-27	117
10885_g	PHI:3226	T2C7K6	pnl1	Penicillium_digitatum	Green Mould Rot	reduced_virulence	47.27	330	123	5	40	324	50	373	2e-77	283
10910_g	PHI:2165	G4N3R9	PTH11	Magnaporthe_oryzae	Rice Blast	reduced_virulence	24.07	349	246	9	27	365	30	369	1e-23	105
10936_g	PHI:199	Q9P304	AOX1	Passalora_fulva	Leaf Mould	reduced_virulence	26.94	219	130	11	309	512	152	355	7e-06	47.4
11056_g	PHI:4603	Q4WQI8	KexB	Aspergillus_fumigatus	Invasive Pulmonary Aspergillosis	reduced_virulence	51.27	825	329	17	22	791	23	829	0	819
11071_g	PHI:2411	A7F946	Ss-ggt1	Sclerotinia_sclerotiorum	White Mould/Stem Rot	reduced_virulence	53.7	365	145	4	224	565	130	493	8e-104	372
11114_g	PHI:3998	E3KNM7	Pgt-IaaM	Puccinia_graminis	Stem Rust	reduced_virulence	39.68	63	37	1	70	132	47	108	5e-05	44.3
11127_g	PHI:2431	C9K1M7	ACTT2	Alternaria_alternata	Alternaria Brown Spot	reduced_virulence	29.81	265	151	7	275	523	3	248	3e-28	121
11142_g	PHI:2644	P0AA28	thioredoxin_1	Salmonella_enterica	Food Poisoning	reduced_virulence	25.77	97	70	1	32	128	5	99	4e-06	47.4
11160_g	PHI:256	Q96TN6	GAS1	Magnaporthe_oryzae	Rice Blast	reduced_virulence	32.88	219	129	8	3	214	2	209	9e-21	95.5
11250_g	PHI:222	O59939	PELB	Colletotrichum_gloeosporioides	Anthracnose	reduced_virulence	60.97	310	115	3	20	328	27	331	2e-97	349
11425_g	PHI:4105	Q8IFL9	?kk4.2	Plasmodium_falciparum	Malaria	reduced_virulence	24.27	103	75	1	181	280	487	589	0.0002	41.6
11477_g	PHI:2058	A7U5U4	LHS1	Magnaporthe_oryzae	Rice Blast	reduced_virulence	28.03	446	265	13	18	415	5	442	2e-32	135
11554_g	PHI:184	Q9HFZ2	RBT4	Candida_albicans	Candidiasis	reduced_virulence	31.03	174	87	7	166	329	208	358	1e-12	68.6
11566_g	PHI:891	G4MVB6	MGG_01748	Magnaporthe_oryzae	Rice Blast	reduced_virulence	35.78	777	406	20	14	715	16	774	9e-109	389
11580_g	PHI:3703	G3F417	fvtox1	Fusarium_virguliforme	Sudden Death Syndrome	reduced_virulence	64.71	170	59	1	1	169	1	170	7e-65	240
11669_g	PHI:2896	N1JK84	BEC1005	Blumeria_graminis	Barley Powdery Mildew	reduced_virulence	30.67	313	173	12	13	312	13	294	2e-28	120
11729_g	PHI:104	Q00310	CaMNT1	Candida_albicans	Candidiasis	reduced_virulence	32.04	284	164	5	37	316	109	367	5e-38	153
12077_g	PHI:2644	P0AA28	thioredoxin_1	Salmonella_enterica	Food Poisoning	reduced_virulence	29.07	86	61	0	305	390	6	91	2e-08	56.2
12346_g	PHI:1046	A0ST43	CTB5	Cercospora_nicotianae	Frog-Eye Leafspot	reduced_virulence	27.74	465	304	12	53	498	5	456	7e-41	162
12479_g	PHI:144	O59928	CHT42	Trichoderma_virens	Mycopathogen	reduced_virulence	23.84	365	225	9	121	448	44	392	2e-20	96.3
12532_g	PHI:3226	T2C7K6	pnl1	Penicillium_digitatum	Green Mould Rot	reduced_virulence	54.38	377	161	6	5	377	4	373	5e-104	372
12554_g	PHI:2165	G4N3R9	PTH11	Magnaporthe_oryzae	Rice Blast	reduced_virulence	22.03	345	243	10	21	352	32	363	1e-14	75.5
12619_g	PHI:199	Q9P304	AOX1	Passalora_fulva	Leaf Mould	reduced_virulence	23.26	430	267	12	21	443	4	377	3e-17	85.1
12642_g	PHI:4970	Q6WIH5	MEP1	Trichophyton_mentagrophytes	Ringworm	reduced_virulence	57.01	635	252	3	18	650	19	634	0	743
12670_g	PHI:3973	L2G011	ASP	Colletotrichum_gloeosporioides	Anthracnose	reduced_virulence	30.59	389	225	17	36	396	44	415	7e-38	152
12723_g	PHI:5393	W7N216	GLX	Fusarium_verticillioides	Maize Ear Rot	reduced_virulence	25.58	258	165	10	433	677	638	881	2e-05	46.2
12746_g	PHI:1093	I1REI8	FGSG_02077	Fusarium_graminearum	Fusarium Ear Blight	reduced_virulence	42.55	47	24	2	33	76	23	69	0.0002	38.5
12768_g	PHI:1089	I1RFR2	FGSG_02549	Fusarium_graminearum	Fusarium Ear Blight	reduced_virulence	43.54	294	151	2	19	297	1	294	1e-64	241
12801_g	PHI:546	Q2LMP0	XYN11A	Botrytis_cinerea	Grey Mould	reduced_virulence	58.3	235	86	4	1	231	1	227	1e-66	247
12889_g	PHI:5188	G4N3U4	MoHPX1	Magnaporthe_oryzae	Rice Blast	reduced_virulence	34.62	130	61	5	104	233	31	136	2e-09	58.5
12906_g	PHI:5188	G4N3U4	MoHPX1	Magnaporthe_oryzae	Rice Blast	reduced_virulence	29.45	146	81	6	78	223	24	147	3e-07	50.8
12907_g	PHI:2165	G4N3R9	PTH11	Magnaporthe_oryzae	Rice Blast	reduced_virulence	29.67	418	268	10	16	414	22	432	6e-45	176
12962_g	PHI:3865	A3RH09	GOX2	Penicillium_expansum	Blue Mould Rot	reduced_virulence	29.25	482	286	16	32	495	28	472	4e-33	137
12968_g	PHI:199	Q9P304	AOX1	Passalora_fulva	Leaf Mould	reduced_virulence	25.35	355	212	15	235	566	8	332	7e-14	73.9
12979_g	PHI:1046	A0ST43	CTB5	Cercospora_nicotianae	Frog-Eye Leafspot	reduced_virulence	25	216	141	6	106	313	52	254	5e-10	60.5
12983_g	PHI:184	Q9HFZ2	RBT4	Candida_albicans	Candidiasis	reduced_virulence	38.52	135	76	4	128	259	213	343	1e-16	81.3
13042_g	PHI:4509	A7EZM9	Ss-odc2	Sclerotinia_sclerotiorum	White Mould	reduced_virulence	63.43	495	176	3	2	492	1	494	0	664
13236_g	PHI:144	O59928	CHT42	Trichoderma_virens	Mycopathogen	reduced_virulence	28.09	235	143	6	64	287	90	309	4e-20	94
13243_g	PHI:323	Q7ZA48	VFGLU1	Lecanicillium_fungicola	Mycopathogen	reduced_virulence	35.39	421	234	14	1	397	1	407	7e-64	239
13290_g	PHI:17	Q00663	ACP	Candida_tropicalis	Candidiasis	reduced_virulence	24.39	410	237	21	8	386	13	380	6e-14	73.2
13369_g	PHI:256	Q96TN6	GAS1	Magnaporthe_oryzae	Rice Blast	reduced_virulence	63.68	201	70	2	4	204	3	200	2e-71	263
13409_g	PHI:4717	Q9I167	PA2414	Pseudomonas_aeruginosa	Nosocomial Infections	reduced_virulence	25	420	227	18	29	416	62	425	4e-13	70.5
13501_g	PHI:5393	W7N216	GLX	Fusarium_verticillioides	Maize Ear Rot	reduced_virulence	24.63	268	171	10	220	480	638	881	1e-10	62.4
13724_g	PHI:1093	I1REI8	FGSG_02077	Fusarium_graminearum	Fusarium Ear Blight	reduced_virulence	50	162	65	4	21	179	22	170	4e-25	108
13798_g	PHI:2920	E3QRA4	FET3-1	Colletotrichum_graminicola	Maize Anthracnose	reduced_virulence	63.92	571	161	4	7	532	13	583	0	757
13875_g	PHI:468	Q6VBJ0	EPA1	Candida_glabrata	Candidiasis	reduced_virulence	30	120	75	3	199	313	140	255	7e-07	49.3
13919_g	PHI:458	O94196	MHP1	Magnaporthe_oryzae	Rice Blast	reduced_virulence	64	100	32	2	1	96	1	100	6e-32	129
14072_g	PHI:267	Q9UW87	MLT1	Candida_albicans	Candidiasis	reduced_virulence	36.36	77	49	0	35	111	1362	1438	3e-09	57.8
14194_g	PHI:72	P0DJ06	SAP2	Candida_albicans	Candidiasis	reduced_virulence	21.88	352	211	15	117	451	79	383	5e-06	47
14282_g	PHI:4845	A0A0E3USI9	PL1332	Alternaria_brassicicola	Black Spot Disease	reduced_virulence	49.01	202	96	3	36	233	20	218	4e-48	185
14305_g	PHI:144	O59928	CHT42	Trichoderma_virens	Mycopathogen	reduced_virulence	27.37	285	147	11	16	256	35	303	4e-17	84
14413_g	PHI:479	C5P3X6	MEP1	Coccidioides_posadasii	Respiratory Disease	reduced_virulence	35.43	223	120	10	53	256	58	275	3e-33	136
14532_g	PHI:257	Q9P470	GAS2	Magnaporthe_oryzae	Rice Blast	reduced_virulence	43.14	306	123	8	3	300	5	267	7e-59	221
14559_g	PHI:2165	G4N3R9	PTH11	Magnaporthe_oryzae	Rice Blast	reduced_virulence	27.72	368	238	10	22	369	28	387	6e-31	129
14657_g	PHI:256	Q96TN6	GAS1	Magnaporthe_oryzae	Rice Blast	reduced_virulence	65	200	69	1	3	202	2	200	1e-72	267
14861_g	PHI:2644	P0AA28	thioredoxin_1	Salmonella_enterica	Food Poisoning	reduced_virulence	31.76	85	50	3	372	453	6	85	8e-05	43.1
14998_g	PHI:3226	T2C7K6	pnl1	Penicillium_digitatum	Green Mould Rot	reduced_virulence	49.1	334	132	5	42	341	42	371	4e-80	292
15101_g	PHI:2570	Q6FM61	CYB2	Candida_glabrata	Candidiasis	reduced_virulence	36.26	364	200	8	38	371	193	554	5e-57	216
15252_g	PHI:17	Q00663	ACP	Candida_tropicalis	Candidiasis	reduced_virulence	31.41	382	218	14	29	405	46	388	2e-36	147
15254_g	PHI:2693	F0XP73	GcABC-G1	Grosmannia_clavigera	No Data Found	reduced_virulence	26.53	671	388	19	351	990	874	1470	1e-53	206
15365_g	PHI:4987	P43077	HEX1	Candida_albicans	Disseminated Candidiasis	reduced_virulence	32.77	476	278	15	132	588	94	546	1e-62	235
15400_g	PHI:816	G4MRS8	MGG_04582	Magnaporthe_oryzae	Rice Blast	reduced_virulence	47.21	269	139	2	342	608	273	540	1e-74	275
15405_g	PHI:2644	P0AA28	thioredoxin_1	Salmonella_enterica	Food Poisoning	reduced_virulence	31.07	103	61	4	358	457	12	107	2e-06	48.9
15514_g	PHI:4248	B0XPI3	PerA	Aspergillus_fumigatus	Invasive Pulmonary Aspergillosis	reduced_virulence	52.98	302	135	3	15	311	15	314	2e-93	336
15542_g	PHI:144	O59928	CHT42	Trichoderma_virens	Mycopathogen	reduced_virulence	47.74	398	198	3	302	690	33	429	8e-100	359
15746_g	PHI:803	G4MRP7	MGG_04629	Magnaporthe_oryzae	Rice Blast	reduced_virulence	20.9	177	128	4	407	582	554	719	3e-06	48.9
15784_g	PHI:3236	J9VHR6	Aph1	Cryptococcus_neoformans	Fungal Meningitis	reduced_virulence	34.41	465	256	11	78	506	86	537	8e-67	249
15793_g	PHI:350	Q6T7C1	EMP1	Magnaporthe_oryzae	Rice Blast	reduced_virulence	42.73	110	59	3	1	106	1	110	6e-16	78.6
123_g	PHI:413	Q5GFD3	MPD1	Parastagonospora_nodorum	Glume Blotch	unaffected_pathogenicity	25	388	217	15	1	335	11	377	1e-13	72.4
238_g	PHI:3972	L2FHG9	CDA	Colletotrichum_gloeosporioides	Anthracnose	unaffected_pathogenicity	37.34	233	123	6	36	246	92	323	4e-34	139
495_g	PHI:1260	I1RUC7	FGSG_07816	Fusarium_graminearum	Fusarium Ear Blight	unaffected_pathogenicity	31.28	179	114	2	288	466	461	630	6e-07	50.8
781_g	PHI:1581	I1RPX8	GzOB021	Fusarium_graminearum	Fusarium Ear Blight	unaffected_pathogenicity	84.96	266	40	0	11	276	10	275	1e-138	486
879_g	PHI:1011	I1RMG9	FET3	Fusarium_graminearum	Fusarium Ear Blight	unaffected_pathogenicity	88.83	618	68	1	6	623	6	622	0	1158
1164_g	PHI:1057	A5HF03	MTP1	Magnaporthe_oryzae	Rice Blast	unaffected_pathogenicity	21.52	316	200	7	258	570	163	433	2e-10	62.4
1233_g	PHI:1581	I1RPX8	GzOB021	Fusarium_graminearum	Fusarium Ear Blight	unaffected_pathogenicity	49.62	266	133	1	3	268	8	272	9e-78	285
1272_g	PHI:1930	I1RER7	GzZC245	Fusarium_graminearum	Fusarium Ear Blight	unaffected_pathogenicity	76.47	272	63	1	460	730	21	292	8e-121	429
1359_g	PHI:1675	Q4I8B6	GzDHHC003	Fusarium_graminearum	Fusarium Ear Blight	unaffected_pathogenicity	29.13	230	115	8	1104	1327	44	231	3e-09	59.7
1409_g	PHI:397	Q5RLJ7	LAC2	Cryptococcus_neoformans	Cryptococcosis	unaffected_pathogenicity	24.87	571	337	22	10	538	44	564	1e-24	109
1461_g	PHI:716	Q2VLJ1	ZEB1	Fusarium_graminearum	Fusarium Ear Blight	unaffected_pathogenicity	56.6	530	203	3	22	524	24	553	8e-177	615
1497_g	PHI:3629	P95200	Rv0392c	Mycobacterium_tuberculosis	Tuberculosis	unaffected_pathogenicity	23.98	221	123	7	99	301	131	324	7e-06	46.2
1549_g	PHI:716	Q2VLJ1	ZEB1	Fusarium_graminearum	Fusarium Ear Blight	unaffected_pathogenicity	46.47	566	286	9	4	562	8	563	2e-142	500
1626_g	PHI:1581	I1RPX8	GzOB021	Fusarium_graminearum	Fusarium Ear Blight	unaffected_pathogenicity	50.21	237	117	1	10	246	15	250	3e-71	263
1657_g	PHI:571	Q06562	XYL1	Cochliobolus_carbonum	Leaf Spot	unaffected_pathogenicity	56.56	221	68	2	1	196	1	218	1e-61	230
1880_g	PHI:2849	Q99174	cutA	Nectria_haematococca_mpV	Storage Rots	unaffected_pathogenicity	73.16	231	56	1	1	231	1	225	4e-96	344
1885_g	PHI:4615	P29138	Pr1	Metarhizium_anisopliae	Fungal Keratitis	unaffected_pathogenicity	38.12	383	208	7	29	410	33	387	1e-64	241
1978_g	PHI:3600	Q8TG07	plb1	Candida_glabrata	Peritonitis	unaffected_pathogenicity	44.21	570	299	10	43	597	27	592	4e-130	459
1982_g	PHI:69	Q00298	CUTA	Botrytis_cinerea	Grey Mould	unaffected_pathogenicity	28.57	147	73	6	17	155	25	147	3e-06	46.6
1983_g	PHI:1390	I1RU53	GzC2H053	Fusarium_graminearum	Fusarium Ear Blight	unaffected_pathogenicity	53.33	45	18	2	240	281	190	234	9e-06	47.4
1988_g	PHI:4024	G4N740	MoST1	Magnaporthe_oryzae	Rice Blast	unaffected_pathogenicity	26.53	475	302	14	7	449	14	473	6e-35	143
2062_g	PHI:4615	P29138	Pr1	Metarhizium_anisopliae	Fungal Keratitis	unaffected_pathogenicity	40.39	406	211	9	1	393	1	388	6e-73	269
2737_g	PHI:1087	I1RKU0	FGSG_04510	Fusarium_graminearum	Fusarium Ear Blight	unaffected_pathogenicity	28.27	237	132	9	22	248	32	240	4e-15	75.9
2742_g	PHI:4246	I1S3C6	xyl03624	Fusarium_graminearum	Fusarium Head Blight	unaffected_pathogenicity	45.78	83	32	2	1	80	1	73	2e-13	71.6
2865_g	PHI:2032	G4NGA7	VTL1	Magnaporthe_oryzae	Rice Blast	unaffected_pathogenicity	43.93	453	248	4	22	471	21	470	5e-113	402
3109_g	PHI:1581	I1RPX8	GzOB021	Fusarium_graminearum	Fusarium Ear Blight	unaffected_pathogenicity	35.74	249	142	9	3	244	13	250	1e-32	134
3298_g	PHI:2451	I1S3N8	FAEB1	Fusarium_graminearum	Fusarium Head Blight	unaffected_pathogenicity	82.15	297	53	0	1	297	1	297	8e-139	487
3375_g	PHI:1503	I1S828	GzHMG035	Fusarium_graminearum	Fusarium Ear Blight	unaffected_pathogenicity	25.94	212	135	7	246	440	299	505	2e-08	55.1
3377_g	PHI:3347	D7UQ40	sol5	Alternaria_solani	Early Blight Of Potato	unaffected_pathogenicity	26.05	476	305	13	23	467	55	514	2e-32	135
3446_g	PHI:541	Q5XTQ4	LIP1	Botrytis_cinerea	Grey Mould	unaffected_pathogenicity	28.19	493	253	18	10	408	27	512	3e-31	130
3660_g	PHI:3972	L2FHG9	CDA	Colletotrichum_gloeosporioides	Anthracnose	unaffected_pathogenicity	39.91	228	125	4	18	233	87	314	5e-43	169
4322_g	PHI:2451	I1S3N8	FAEB1	Fusarium_graminearum	Fusarium Head Blight	unaffected_pathogenicity	39.1	289	155	5	14	283	10	296	9e-53	201
4339_g	PHI:1503	I1S828	GzHMG035	Fusarium_graminearum	Fusarium Ear Blight	unaffected_pathogenicity	28.84	215	132	5	272	471	286	494	2e-21	98.6
4355_g	PHI:716	Q2VLJ1	ZEB1	Fusarium_graminearum	Fusarium Ear Blight	unaffected_pathogenicity	24.22	450	293	20	66	491	122	547	9e-12	66.2
4364_g	PHI:1087	I1RKU0	FGSG_04510	Fusarium_graminearum	Fusarium Ear Blight	unaffected_pathogenicity	36.09	133	64	3	77	205	215	330	1e-21	97.8
4401_g	PHI:4615	P29138	Pr1	Metarhizium_anisopliae	Fungal Keratitis	unaffected_pathogenicity	50.26	390	179	6	3	386	6	386	2e-104	374
4416_g	PHI:3	P26215	PGN1	Cochliobolus_carbonum	Leaf Spot	unaffected_pathogenicity	64.27	361	126	2	2	359	4	364	3e-130	459
4455_g	PHI:5034	G4NHC2	MoADH1	Magnaporthe_oryzae	Rice Blast	unaffected_pathogenicity	30.91	330	204	10	29	340	23	346	4e-34	139
4512_g	PHI:191	Q99324	TOM1	Septoria_lycopersici	Leaf Spot	unaffected_pathogenicity	36.3	427	229	13	196	589	342	758	7e-57	216
4515_g	PHI:541	Q5XTQ4	LIP1	Botrytis_cinerea	Grey Mould	unaffected_pathogenicity	32.56	390	218	17	6	357	10	392	1e-37	152
4715_g	PHI:1029	Q8X116	bcpme2	Botrytis_cinerea	Grey Mould	unaffected_pathogenicity	26	350	179	14	44	368	35	329	2e-17	84.7
4848_g	PHI:2350	I1RTB7	MID1	Fusarium_graminearum	Fusarium Ear Blight	unaffected_pathogenicity	70.9	622	141	4	1	586	1	618	0	894
5775_g	PHI:191	Q99324	TOM1	Septoria_lycopersici	Leaf Spot	unaffected_pathogenicity	37.84	666	307	17	47	635	31	666	4e-113	404
5804_g	PHI:3972	L2FHG9	CDA	Colletotrichum_gloeosporioides	Anthracnose	unaffected_pathogenicity	60.89	404	135	2	19	421	3	384	7e-146	511
5895_g	PHI:1094	I1RL30	FGSG_04610	Fusarium_graminearum	Fusarium Ear Blight	unaffected_pathogenicity	29.07	227	128	2	1	227	64	257	5e-21	95.5
5972_g	PHI:1087	I1RKU0	FGSG_04510	Fusarium_graminearum	Fusarium Ear Blight	unaffected_pathogenicity	42.17	313	148	11	31	332	40	330	3e-59	223
6025_g	PHI:552	Q96WM9	BcLCC2	Botrytis_cinerea	Grey Mould	unaffected_pathogenicity	38.91	568	284	16	66	623	31	545	4e-96	347
6051_g	PHI:4508	A7EU07	Ss-odc1	Sclerotinia_sclerotiorum	White Mould	unaffected_pathogenicity	43.38	385	188	8	50	407	50	431	3e-91	330
6191_g	PHI:2032	G4NGA7	VTL1	Magnaporthe_oryzae	Rice Blast	unaffected_pathogenicity	27.21	408	250	12	47	443	49	420	3e-29	124
6278_g	PHI:569	O59937	XYL3	Fusarium_oxysporum	Vascular Wilt	unaffected_pathogenicity	89.06	384	42	0	1	384	1	384	0	679
6287_g	PHI:552	Q96WM9	BcLCC2	Botrytis_cinerea	Grey Mould	unaffected_pathogenicity	46.45	564	265	12	20	554	26	581	2e-136	480
6305_g	PHI:4010	Q4ZHV5	Plp	Vibrio_anguillarum	Vibriosis	unaffected_pathogenicity	23.45	307	178	15	16	292	136	415	3e-08	53.9
6346_g	PHI:2032	G4NGA7	VTL1	Magnaporthe_oryzae	Rice Blast	unaffected_pathogenicity	27.88	391	212	19	56	394	46	418	4e-21	97.4
6480_g	PHI:2043	Q8NJ73	XYL-6	Magnaporthe_oryzae	Rice Blast	unaffected_pathogenicity	53.23	310	101	6	22	289	73	380	2e-78	286
6581_g	PHI:1260	I1RUC7	FGSG_07816	Fusarium_graminearum	Fusarium Ear Blight	unaffected_pathogenicity	34.84	155	101	0	1326	1480	450	604	2e-15	80.5
6615_g	PHI:3347	D7UQ40	sol5	Alternaria_solani	Early Blight Of Potato	unaffected_pathogenicity	28.6	444	289	12	63	502	94	513	2e-35	144
6655_g	PHI:114	O00094	PG1	Fusarium_oxysporum	Vascular Wilt	unaffected_pathogenicity	24.88	201	128	6	263	459	183	364	8e-06	46.6
6672_g	PHI:1581	I1RPX8	GzOB021	Fusarium_graminearum	Fusarium Ear Blight	unaffected_pathogenicity	49.59	242	111	5	11	251	19	250	1e-61	230
6697_g	PHI:1260	I1RUC7	FGSG_07816	Fusarium_graminearum	Fusarium Ear Blight	unaffected_pathogenicity	29.11	237	118	8	998	1234	421	607	5e-06	48.9
6704_g	PHI:569	O59937	XYL3	Fusarium_oxysporum	Vascular Wilt	unaffected_pathogenicity	58.54	41	17	0	366	406	13	53	1e-09	58.5
6785_g	PHI:3985	I1RX03	FGSG_08844_(Sc_gpi7)	Fusarium_graminearum	Fusarium Head Blight	unaffected_pathogenicity	73.35	863	134	13	1	778	1	852	0	1131
7020_g	PHI:1756	I1S4Q3	GzZC071	Fusarium_graminearum	Fusarium Ear Blight	unaffected_pathogenicity	31.01	416	247	11	144	532	522	924	5e-42	167
7051_g	PHI:69	Q00298	CUTA	Botrytis_cinerea	Grey Mould	unaffected_pathogenicity	25.34	146	77	5	63	207	71	185	6e-05	42
7052_g	PHI:69	Q00298	CUTA	Botrytis_cinerea	Grey Mould	unaffected_pathogenicity	24.48	143	76	4	68	209	74	185	1e-05	44.7
7079_g	PHI:4615	P29138	Pr1	Metarhizium_anisopliae	Fungal Keratitis	unaffected_pathogenicity	41.12	411	198	7	14	412	9	387	9e-74	271
7286_g	PHI:1503	I1S828	GzHMG035	Fusarium_graminearum	Fusarium Ear Blight	unaffected_pathogenicity	24.36	353	239	10	93	425	162	506	2e-17	84.7
7464_g	PHI:1087	I1RKU0	FGSG_04510	Fusarium_graminearum	Fusarium Ear Blight	unaffected_pathogenicity	63.79	301	108	1	24	324	31	330	5e-116	411
7522_g	PHI:716	Q2VLJ1	ZEB1	Fusarium_graminearum	Fusarium Ear Blight	unaffected_pathogenicity	30.49	164	99	8	135	288	214	372	6e-08	53.5
7552_g	PHI:1029	Q8X116	bcpme2	Botrytis_cinerea	Grey Mould	unaffected_pathogenicity	37.63	295	161	10	1362	1651	33	309	5e-36	149
7852_g	PHI:3972	L2FHG9	CDA	Colletotrichum_gloeosporioides	Anthracnose	unaffected_pathogenicity	52.88	365	154	4	46	394	22	384	2e-109	390
8084_g	PHI:716	Q2VLJ1	ZEB1	Fusarium_graminearum	Fusarium Ear Blight	unaffected_pathogenicity	34.88	562	318	18	24	562	27	563	8e-79	289
8114_g	PHI:4076	A4VTH6	BgaC	Streptococcus_suis	Meningitis	unaffected_pathogenicity	31.4	379	219	11	47	411	9	360	6e-36	147
8338_g	PHI:1455	I1RKU6	GzAra003	Fusarium_graminearum	Fusarium Ear Blight	unaffected_pathogenicity	22.16	334	199	11	64	378	30	321	2e-07	52
8349_g	PHI:2978	G4N5V2	MoCel12A	Magnaporthe_oryzae	Rice Blast	unaffected_pathogenicity	33.53	170	93	9	181	344	93	248	3e-10	60.5
8582_g	PHI:413	Q5GFD3	MPD1	Parastagonospora_nodorum	Glume Blotch	unaffected_pathogenicity	23.48	362	231	12	5	338	12	355	3e-16	80.5
8644_g	PHI:1087	I1RKU0	FGSG_04510	Fusarium_graminearum	Fusarium Ear Blight	unaffected_pathogenicity	29.69	320	175	14	62	371	51	330	2e-26	114
8721_g	PHI:1555	I1RDG6	GzMyb019	Fusarium_graminearum	Fusarium Ear Blight	unaffected_pathogenicity	23.06	412	258	13	109	487	133	518	4e-18	87.4
8806_g	PHI:566	Q9C1F9	cel2	Cochliobolus_carbonum	Leaf Spot	unaffected_pathogenicity	47.72	417	189	9	3	398	2	410	8e-104	371
8913_g	PHI:541	Q5XTQ4	LIP1	Botrytis_cinerea	Grey Mould	unaffected_pathogenicity	34.08	358	191	15	21	343	29	376	1e-37	152
8928_g	PHI:3984	I1RD96	FGSG_01588_(Sc_gpi7)	Fusarium_graminearum	Fusarium Head Blight	unaffected_pathogenicity	39.42	104	48	3	339	430	577	677	1e-06	48.9
9112_g	PHI:191	Q99324	TOM1	Septoria_lycopersici	Leaf Spot	unaffected_pathogenicity	25.37	753	444	23	92	744	65	799	2e-37	152
9189_g	PHI:4615	P29138	Pr1	Metarhizium_anisopliae	Fungal Keratitis	unaffected_pathogenicity	34.62	442	208	14	13	436	8	386	4e-51	196
9815_g	PHI:570	Q9C1R1	XYL4	Fusarium_oxysporum	Vascular Wilt	unaffected_pathogenicity	85.25	183	26	1	1	183	1	182	1e-86	313
9928_g	PHI:4246	I1S3C6	xyl03624	Fusarium_graminearum	Fusarium Head Blight	unaffected_pathogenicity	40.48	42	24	1	795	835	12	53	0.0004	41.6
10151_g	PHI:1748	I1S6Q5	GzZC063	Fusarium_graminearum	Fusarium Ear Blight	unaffected_pathogenicity	39.49	509	237	8	229	734	54	494	3e-92	334
10342_g	PHI:1503	I1S828	GzHMG035	Fusarium_graminearum	Fusarium Ear Blight	unaffected_pathogenicity	28.8	250	152	7	254	483	264	507	3e-23	104
10363_g	PHI:566	Q9C1F9	cel2	Cochliobolus_carbonum	Leaf Spot	unaffected_pathogenicity	27.43	452	264	20	1	429	1	411	2e-30	127
10408_g	PHI:3347	D7UQ40	sol5	Alternaria_solani	Early Blight Of Potato	unaffected_pathogenicity	30.39	487	321	10	45	527	42	514	5e-49	190
10412_g	PHI:4615	P29138	Pr1	Metarhizium_anisopliae	Fungal Keratitis	unaffected_pathogenicity	52.94	391	178	2	1	389	1	387	1e-119	424
10529_g	PHI:3985	I1RX03	FGSG_08844_(Sc_gpi7)	Fusarium_graminearum	Fusarium Head Blight	unaffected_pathogenicity	27.21	577	335	24	478	1026	119	638	5e-08	55.1
10574_g	PHI:2183	A4QUT2	CPXB	Magnaporthe_oryzae	Rice Blast	unaffected_pathogenicity	64.93	787	202	9	1	714	1	786	0	1004
10675_g	PHI:1503	I1S828	GzHMG035	Fusarium_graminearum	Fusarium Ear Blight	unaffected_pathogenicity	30	250	150	6	203	433	264	507	2e-26	114
10696_g	PHI:1613	I1S2J0	GzP53L006	Fusarium_graminearum	Fusarium Ear Blight	unaffected_pathogenicity	33.42	374	170	13	1	359	1	310	3e-19	90.5
10796_g	PHI:181	Q96VZ3	PGX1	Fusarium_oxysporum	Vascular Wilt	unaffected_pathogenicity	96.26	455	17	0	1	455	1	455	0	862
10891_g	PHI:3225	T2C913	Ndo1	Penicillium_digitatum	Green Mould Rot	unaffected_pathogenicity	40.47	383	180	8	43	380	24	403	1e-83	304
10906_g	PHI:1581	I1RPX8	GzOB021	Fusarium_graminearum	Fusarium Ear Blight	unaffected_pathogenicity	46.05	228	115	2	19	241	26	250	4e-57	216
10966_g	PHI:2510	Q6PWQ1	msdS/AfmsdC	Aspergillus_fumigatus	Invasive Pulmonary Aspergillosis	unaffected_pathogenicity	32.92	486	287	13	92	556	32	499	6e-58	219
11094_g	PHI:2032	G4NGA7	VTL1	Magnaporthe_oryzae	Rice Blast	unaffected_pathogenicity	29.85	536	322	18	23	535	23	527	6e-51	196
11148_g	PHI:4010	Q4ZHV5	Plp	Vibrio_anguillarum	Vibriosis	unaffected_pathogenicity	26.14	264	153	9	29	255	144	402	2e-12	67.4
11159_g	PHI:4615	P29138	Pr1	Metarhizium_anisopliae	Fungal Keratitis	unaffected_pathogenicity	46.9	339	153	6	1	316	1	335	2e-77	283
11365_g	PHI:4615	P29138	Pr1	Metarhizium_anisopliae	Fungal Keratitis	unaffected_pathogenicity	41.82	385	188	6	58	438	29	381	5e-73	269
11416_g	PHI:4890	Q5AHZ2	orf19.3060	Candida_albicans	Disseminated Candidiasis	unaffected_pathogenicity	21.94	278	186	12	19	281	14	275	1e-07	51.2
11654_g	PHI:552	Q96WM9	BcLCC2	Botrytis_cinerea	Grey Mould	unaffected_pathogenicity	43.22	583	298	12	1	558	7	581	8e-133	468
11778_g	PHI:1575	I1RIQ3	GzOB015	Fusarium_graminearum	Fusarium Ear Blight	unaffected_pathogenicity	40.74	189	90	6	30	210	66	240	2e-31	130
11798_g	PHI:541	Q5XTQ4	LIP1	Botrytis_cinerea	Grey Mould	unaffected_pathogenicity	32.8	564	291	20	13	521	35	565	4e-61	230
12021_g	PHI:3984	I1RD96	FGSG_01588_(Sc_gpi7)	Fusarium_graminearum	Fusarium Head Blight	unaffected_pathogenicity	35.66	129	40	7	84	170	596	723	2e-05	43.5
12042_g	PHI:3378	G9JLA8	Plegl1	Pyrenochaeta_lycopersici	Corky Root Rot Of Tomato	unaffected_pathogenicity	36.36	231	121	9	17	240	17	228	9e-25	109
12626_g	PHI:2849	Q99174	cutA	Nectria_haematococca_mpV	Storage Rots	unaffected_pathogenicity	76.99	226	51	1	1	226	1	225	3e-98	352
12688_g	PHI:3984	I1RD96	FGSG_01588_(Sc_gpi7)	Fusarium_graminearum	Fusarium Head Blight	unaffected_pathogenicity	46.3	108	47	7	56	162	569	666	2e-11	63.9
12699_g	PHI:541	Q5XTQ4	LIP1	Botrytis_cinerea	Grey Mould	unaffected_pathogenicity	30.83	266	145	10	79	320	127	377	4e-24	107
12748_g	PHI:2032	G4NGA7	VTL1	Magnaporthe_oryzae	Rice Blast	unaffected_pathogenicity	50.29	523	250	5	17	534	19	536	2e-156	547
12806_g	PHI:4246	I1S3C6	xyl03624	Fusarium_graminearum	Fusarium Head Blight	unaffected_pathogenicity	39.47	76	37	1	1	76	1	67	2e-10	62
12870_g	PHI:1727	I1S5Q2	GzZC042	Fusarium_graminearum	Fusarium Ear Blight	unaffected_pathogenicity	26.17	107	79	0	3	109	228	334	2e-05	44.3
12872_g	PHI:541	Q5XTQ4	LIP1	Botrytis_cinerea	Grey Mould	unaffected_pathogenicity	34.51	510	282	15	95	572	56	545	2e-64	241
12874_g	PHI:1575	I1RIQ3	GzOB015	Fusarium_graminearum	Fusarium Ear Blight	unaffected_pathogenicity	84.77	243	36	1	1	242	1	243	3e-116	412
12937_g	PHI:716	Q2VLJ1	ZEB1	Fusarium_graminearum	Fusarium Ear Blight	unaffected_pathogenicity	31.11	585	363	17	10	593	17	562	1e-67	252
12976_g	PHI:716	Q2VLJ1	ZEB1	Fusarium_graminearum	Fusarium Ear Blight	unaffected_pathogenicity	34.45	569	327	11	91	640	21	562	2e-87	317
12991_g	PHI:4615	P29138	Pr1	Metarhizium_anisopliae	Fungal Keratitis	unaffected_pathogenicity	39.71	418	201	7	10	411	5	387	8e-74	271
13017_g	PHI:4076	A4VTH6	BgaC	Streptococcus_suis	Meningitis	unaffected_pathogenicity	28.75	327	191	10	43	351	9	311	2e-26	116
13027_g	PHI:191	Q99324	TOM1	Septoria_lycopersici	Leaf Spot	unaffected_pathogenicity	24.65	710	401	23	133	727	106	796	1e-27	119
13084_g	PHI:115	Q00359	PGX1	Cochliobolus_carbonum	Leaf Spot	unaffected_pathogenicity	35.71	392	233	7	29	403	47	436	3e-57	216
13172_g	PHI:541	Q5XTQ4	LIP1	Botrytis_cinerea	Grey Mould	unaffected_pathogenicity	33.53	516	224	18	39	461	51	540	7e-53	202
13246_g	PHI:2032	G4NGA7	VTL1	Magnaporthe_oryzae	Rice Blast	unaffected_pathogenicity	26.51	464	302	12	53	498	43	485	7e-42	166
13253_g	PHI:2817	Q9C4A0	Aapg1	Alternaria_alternata	Brown Spot	unaffected_pathogenicity	63.58	346	101	4	35	357	35	378	2e-114	406
13289_g	PHI:1662	I1REJ1	GzCCHC002	Fusarium_graminearum	Fusarium Ear Blight	unaffected_pathogenicity	33.05	469	265	10	462	894	657	1112	1e-76	282
13413_g	PHI:2978	G4N5V2	MoCel12A	Magnaporthe_oryzae	Rice Blast	unaffected_pathogenicity	47.28	239	113	5	8	237	28	262	7e-54	204
13427_g	PHI:2043	Q8NJ73	XYL-6	Magnaporthe_oryzae	Rice Blast	unaffected_pathogenicity	42.06	340	162	9	20	353	70	380	2e-64	240
13479_g	PHI:716	Q2VLJ1	ZEB1	Fusarium_graminearum	Fusarium Ear Blight	unaffected_pathogenicity	25.73	241	166	5	91	323	130	365	4e-16	80.9
13489_g	PHI:716	Q2VLJ1	ZEB1	Fusarium_graminearum	Fusarium Ear Blight	unaffected_pathogenicity	33.39	560	313	12	88	611	27	562	5e-82	300
13608_g	PHI:1087	I1RKU0	FGSG_04510	Fusarium_graminearum	Fusarium Ear Blight	unaffected_pathogenicity	32.43	333	182	10	71	402	40	330	2e-35	144
13721_g	PHI:3600	Q8TG07	plb1	Candida_glabrata	Peritonitis	unaffected_pathogenicity	46.5	572	280	9	70	623	27	590	3e-143	503
13810_g	PHI:3214	G4MML4	MoCDIP2	Magnaporthe_oryzae	Rice Blast	unaffected_pathogenicity	31.58	76	47	2	1	71	1	76	0.0003	37.4
13850_g	PHI:1579	I1RM25	GzOB019	Fusarium_graminearum	Fusarium Ear Blight	unaffected_pathogenicity	33.39	617	351	11	15	595	548	1140	2e-87	318
13863_g	PHI:4024	G4N740	MoST1	Magnaporthe_oryzae	Rice Blast	unaffected_pathogenicity	24.27	206	144	5	23	220	44	245	2e-05	45.4
13876_g	PHI:1087	I1RKU0	FGSG_04510	Fusarium_graminearum	Fusarium Ear Blight	unaffected_pathogenicity	26.71	337	202	10	26	356	33	330	3e-21	97.1
13889_g	PHI:1713	I1RGG4	GzZC028	Fusarium_graminearum	Fusarium Ear Blight	unaffected_pathogenicity	35.04	488	284	7	73	549	76	541	1e-75	278
13937_g	PHI:4010	Q4ZHV5	Plp	Vibrio_anguillarum	Vibriosis	unaffected_pathogenicity	25.26	285	184	11	35	310	143	407	5e-14	73.2
13971_g	PHI:716	Q2VLJ1	ZEB1	Fusarium_graminearum	Fusarium Ear Blight	unaffected_pathogenicity	31.14	607	363	16	1	597	3	564	4e-68	253
14003_g	PHI:2451	I1S3N8	FAEB1	Fusarium_graminearum	Fusarium Head Blight	unaffected_pathogenicity	37.99	308	161	9	14	315	11	294	5e-49	189
14160_g	PHI:4024	G4N740	MoST1	Magnaporthe_oryzae	Rice Blast	unaffected_pathogenicity	29.29	239	157	4	31	269	32	258	4e-19	90.1
14308_g	PHI:4010	Q4ZHV5	Plp	Vibrio_anguillarum	Vibriosis	unaffected_pathogenicity	24.5	298	173	11	26	296	143	415	6e-08	52.8
14406_g	PHI:4725	A0A0D2YC96	gbe1	Fusarium_oxysporum	Fusarium Wilt	unaffected_pathogenicity	28.47	137	84	4	80	211	55	182	9e-08	52.8
14435_g	PHI:3600	Q8TG07	plb1	Candida_glabrata	Peritonitis	unaffected_pathogenicity	44.37	586	293	13	38	604	24	595	1e-134	474
14515_g	PHI:191	Q99324	TOM1	Septoria_lycopersici	Leaf Spot	unaffected_pathogenicity	43.11	784	360	20	38	757	33	794	3e-163	570
14536_g	PHI:1087	I1RKU0	FGSG_04510	Fusarium_graminearum	Fusarium Ear Blight	unaffected_pathogenicity	35.2	321	161	11	27	323	33	330	5e-45	176
14554_g	PHI:2166	G4N4F9	CBP1	Magnaporthe_oryzae	Rice Blast	unaffected_pathogenicity	65.96	47	15	1	277	323	405	450	2e-10	61.6
14561_g	PHI:4615	P29138	Pr1	Metarhizium_anisopliae	Fungal Keratitis	unaffected_pathogenicity	37.58	322	185	6	78	391	74	387	5e-57	216
14562_g	PHI:2032	G4NGA7	VTL1	Magnaporthe_oryzae	Rice Blast	unaffected_pathogenicity	31.17	401	228	10	40	406	33	419	4e-48	187
14564_g	PHI:740	Q079H2	BeNEP1	Botrytis_elliptica	Grey Mould	unaffected_pathogenicity	41.63	245	92	5	7	208	8	244	1e-43	170
14567_g	PHI:2166	G4N4F9	CBP1	Magnaporthe_oryzae	Rice Blast	unaffected_pathogenicity	47.5	80	36	1	30	103	143	222	3e-15	74.3
14755_g	PHI:3985	I1RX03	FGSG_08844_(Sc_gpi7)	Fusarium_graminearum	Fusarium Head Blight	unaffected_pathogenicity	46.11	167	59	7	881	1017	448	613	5e-22	101
14793_g	PHI:191	Q99324	TOM1	Septoria_lycopersici	Leaf Spot	unaffected_pathogenicity	24.28	696	383	27	111	698	105	764	1e-23	106
14876_g	PHI:2032	G4NGA7	VTL1	Magnaporthe_oryzae	Rice Blast	unaffected_pathogenicity	28.08	381	230	10	65	431	46	396	1e-36	149
15005_g	PHI:541	Q5XTQ4	LIP1	Botrytis_cinerea	Grey Mould	unaffected_pathogenicity	56.03	580	236	8	5	579	4	569	0	636
15024_g	PHI:3984	I1RD96	FGSG_01588_(Sc_gpi7)	Fusarium_graminearum	Fusarium Head Blight	unaffected_pathogenicity	53.76	599	141	20	128	651	187	724	4e-112	399
15047_g	PHI:2088	G4MR15	Moatg27	Magnaporthe_oryzae	Rice Blast	unaffected_pathogenicity	46.09	345	139	10	6	321	15	341	1e-73	271
15060_g	PHI:69	Q00298	CUTA	Botrytis_cinerea	Grey Mould	unaffected_pathogenicity	56.96	158	68	0	186	343	31	188	7e-42	165
15624_g	PHI:566	Q9C1F9	cel2	Cochliobolus_carbonum	Leaf Spot	unaffected_pathogenicity	36.51	430	221	16	6	429	6	389	1e-63	238
16040_g	PHI:1349	I1RCB1	GzC2H009	Fusarium_graminearum	Fusarium Ear Blight	unaffected_pathogenicity	27.12	354	216	11	5	327	11	353	1e-24	109
16114_g	PHI:4889	Q5AJA4	tos1	Candida_albicans	Disseminated Candidiasis	unaffected_pathogenicity	37.39	468	257	13	1	443	1	457	2e-72	267
